# Supplementary material for: Phosphoglycerate mutase regulates Treg differentiation through control of serine synthesis and one-carbon metabolism
Source: eLife. 2025 Jul 28;14:RP104423. doi: 10.7554/eLife.104423 (PMC12303568; doi:10.7554/eLife.104423)
Supplement: Supplementary file 1. [file elife-104423-supp1.xlsx]

## Sheet: Table S1
Supp File 1	Differential Gene Expression - Pgam ASOs versus Scrambled ASOs
		baseMean	log2FoldChange	lfcSE	stat	pvalue	padj	neg_log
ENSMUSG00000119584		208875	0.407577	0.158698	2.56826	0.010221	0.0489533	1.99051
ENSMUSG00000037742	Eef1a1	189403	-0.11929	0.0853928	-1.39696	0.162426	0.340093	0.789344
ENSMUSG00000064351	mt-Co1	125637	-0.744956	0.100049	-7.44591	9.63e-14	1.59e-11	13.0165
ENSMUSG00000034994	Eef2	82237.8	0.00628478	0.084489	0.0743858	0.940703	0.970801	0.0265473
ENSMUSG00000032294	Pkm	54708.1	0.0427669	0.125763	0.34006	0.733811	0.853808	0.134416
ENSMUSG00000029580	Actb	95207.9	0.300978	0.105797	2.84486	0.00444307	0.0265474	2.35232
ENSMUSG00000032518	Rpsa	51802.3	-0.0439658	0.0818533	-0.537129	0.591178	0.75677	0.228282
ENSMUSG00000067274	Rplp0	46993.5	-0.0494522	0.0825502	-0.599056	0.549135	0.725426	0.260321
ENSMUSG00000023944	Hsp90ab1	51604.8	0.344867	0.122513	2.81494	0.00487863	0.0285497	2.3117
ENSMUSG00000063524	Eno1	47278.9	0.214081	0.118848	1.8013	0.0716559	0.195825	1.14475
ENSMUSG00000032399	Rpl4	43652.4	-0.00176645	0.0916378	-0.0192764	0.984621	0.992328	0.00673108
ENSMUSG00000015656	Hspa8	50438.9	0.349847	0.116333	3.0073	0.00263581	0.0182235	2.57909
ENSMUSG00000049775	Tmsb4x	55232.3	0.105041	0.0882561	1.19019	0.233973	0.432913	0.630833
ENSMUSG00000063229	Ldha	42636.1	0.121298	0.129666	0.935463	0.34955	0.557207	0.456491
ENSMUSG00000060126	Tpt1	30224.6	-0.293808	0.084154	-3.49131	0.000480655	0.00508078	3.31817
ENSMUSG00000044533	Rps2	35242.2	0.234415	0.131173	1.78707	0.0739257	0.200747	1.1312
ENSMUSG00000062070	Pgk1	33367.2	0.00411729	0.1395	0.0295147	0.976454	0.988333	0.0103482
ENSMUSG00000060036	Rpl3	31852.2	0.103158	0.0942887	1.09407	0.273925	0.479616	0.562368
ENSMUSG00000030695	Aldoa	32550.4	-0.0315856	0.118791	-0.265891	0.790323	0.88692	0.102195
ENSMUSG00000026770	Il2ra	39278.3	0.527743	0.130215	4.05287	5.06e-05	0.000909417	4.2959
ENSMUSG00000020372	Rack1	30900.7	-0.0419958	0.0884027	-0.475051	0.63475	0.789012	0.197397
ENSMUSG00000092341	Malat1	31251.6	-0.57315	0.124723	-4.5954	4.32e-06	0.000117649	5.3646
ENSMUSG00000000740	Rpl13	29081.9	0.100908	0.104172	0.968668	0.332711	0.541489	0.477933
ENSMUSG00000043716	Rpl7	28031.7	-0.0764298	0.0863354	-0.885266	0.376013	0.581926	0.424797
ENSMUSG00000026728	Vim	28775.4	0.734875	0.113634	6.46706	9.99e-11	9.9e-09	10.0003
ENSMUSG00000022283	Pabpc1	30592.1	-0.187278	0.0826561	-2.26575	0.0234665	0.0887517	1.62955
ENSMUSG00000007892	Rplp1	26554.7	0.164693	0.118003	1.39567	0.162813	0.340618	0.788312
ENSMUSG00000062825	Actg1	34688.8	0.25402	0.122904	2.06681	0.0387516	0.127756	1.41171
ENSMUSG00000030744	Rps3	25054.8	-0.0360331	0.0906043	-0.397698	0.690853	0.827672	0.160614
ENSMUSG00000031320	Rps4x	26122.5	-0.0265466	0.0851201	-0.311872	0.755138	0.867234	0.121974
ENSMUSG00000058558	Rpl5	23346	0.0255586	0.0928347	0.275313	0.783076	0.883093	0.106196
ENSMUSG00000029614	Rpl6	25398.5	0.0718237	0.0945528	0.759615	0.447485	0.642316	0.349222
ENSMUSG00000028081	Rps3a1	24144.3	0.00669011	0.0918379	0.072847	0.941928	0.971599	0.0259823
ENSMUSG00000093674	Rpl41	23394.3	0.278428	0.12118	2.29764	0.0215825	0.0832941	1.6659
ENSMUSG00000028495	Rps6	23837.8	0.034963	0.0922446	0.379025	0.70467	0.836178	0.152014
ENSMUSG00000003970	Rpl8	25429.9	0.236092	0.120678	1.95639	0.0504194	0.154158	1.2974
ENSMUSG00000001525	Tubb5	34726.6	0.192763	0.0980007	1.96695	0.0491887	0.15155	1.30813
ENSMUSG00000057113	Npm1	19194	0.25781	0.113989	2.26172	0.0237146	0.0895271	1.62498
ENSMUSG00000025362	Rps26	22963.7	0.0607428	0.108592	0.559366	0.575912	0.746555	0.239644
ENSMUSG00000064341	mt-Nd1	36608.5	0.0176682	0.100405	0.175969	0.860318	0.928293	0.0653408
ENSMUSG00000021998	Lcp1	24988.2	0.125713	0.0888788	1.41443	0.157236	0.332459	0.803449
ENSMUSG00000045128	Rpl18a	19394.9	-0.207025	0.0878042	-2.3578	0.0183834	0.0742979	1.73558
ENSMUSG00000025203	Scd2	21610.6	0.493804	0.133428	3.7009	0.000214839	0.00279457	3.66789
ENSMUSG00000008668	Rps18	18498.5	0.106217	0.0982254	1.08136	0.279535	0.485992	0.553564
ENSMUSG00000025290	Rps24	19228.5	-0.133108	0.0820979	-1.62134	0.104945	0.254298	0.979036
ENSMUSG00000064370	mt-Cytb	31335.3	-1.22956	0.110857	-11.0914	1.38e-28	2.31e-25	27.8598
ENSMUSG00000038900	Rpl12	17726.8	-0.039121	0.0837134	-0.467321	0.64027	0.793385	0.193637
ENSMUSG00000026238	Ptma	32264.3	0.152645	0.110583	1.38036	0.167475	0.347153	0.77605
ENSMUSG00000012848	Rps5	19896.8	-0.125397	0.0886535	-1.41446	0.157226	0.332459	0.803477
ENSMUSG00000046364	Rpl27a	18449.7	-0.0141649	0.0953881	-0.148497	0.88195	0.939697	0.0545559
ENSMUSG00000079523	Tmsb10	21972.5	0.101211	0.0946087	1.06979	0.284715	0.4912	0.545589
ENSMUSG00000024608	Rps14	17209.7	-0.100378	0.0826344	-1.21473	0.224471	0.421229	0.64884
ENSMUSG00000071866	Ppia	24004.2	0.303373	0.120405	2.5196	0.0117489	0.0538733	1.93
ENSMUSG00000006333	Rps9	19628.9	0.0762392	0.0972772	0.783731	0.433198	0.63107	0.363314
ENSMUSG00000008682	Rpl10	17436.1	0.0935181	0.110174	0.84882	0.395982	0.598491	0.402325
ENSMUSG00000023456	Tpi1	19526.7	0.159923	0.125571	1.27356	0.202819	0.394762	0.692891
ENSMUSG00000078812	Eif5a	21266.9	0.373656	0.146542	2.54982	0.010778	0.0507656	1.96746
ENSMUSG00000047675	Rps8	18603.4	0.172648	0.111355	1.55044	0.121037	0.280575	0.917084
ENSMUSG00000037805	Rpl10a	17186.7	-0.00387592	0.0885827	-0.0437549	0.9651	0.983427	0.0154278
ENSMUSG00000025393	Atp5b	20292.6	0.438543	0.134256	3.26646	0.00108901	0.00947102	2.96297
ENSMUSG00000071644	Eef1g	18666.2	0.294176	0.125753	2.33932	0.0193188	0.0770029	1.71402
ENSMUSG00000037563	Rps16	15968.4	0.0273596	0.0943216	0.290068	0.771765	0.87594	0.112515
ENSMUSG00000039218	Srrm2	24248.5	-0.262904	0.0953231	-2.75803	0.00581509	0.0324297	2.23544
ENSMUSG00000026234	Ncl	21846.9	0.316115	0.130769	2.41735	0.0156339	0.0660758	1.80593
ENSMUSG00000057841	Rpl32	15683	0.0263264	0.0888668	0.296245	0.767043	0.873514	0.11518
ENSMUSG00000017404	Rpl19	16834.6	0.0254623	0.0873602	0.291463	0.770697	0.875437	0.113116
ENSMUSG00000061232	H2-K1	19749.4	0.0499223	0.0979619	0.509609	0.610326	0.770865	0.214438
ENSMUSG00000059070	Rpl18	15830.3	0.0327639	0.0953539	0.343603	0.731145	0.852431	0.135996
ENSMUSG00000060802	B2m	17097.7	0.112826	0.100874	1.11848	0.263362	0.467951	0.579447
ENSMUSG00000020719	Ddx5	21745.9	-0.169857	0.0862972	-1.96828	0.0490361	0.151182	1.30948
ENSMUSG00000026395	Ptprc	19954.7	-0.371799	0.128818	-2.88624	0.0038988	0.0240781	2.40907
ENSMUSG00000004980	Hnrnpa2b1	22033.1	0.348682	0.0983875	3.54397	0.000394153	0.00438488	3.40433
ENSMUSG00000073411	H2-D1	18959.3	0.0817863	0.0897481	0.911288	0.362144	0.568888	0.441119
ENSMUSG00000021270	Hsp90aa1	19144.8	0.462482	0.148185	3.12099	0.00180246	0.013768	2.74414
ENSMUSG00000064367	mt-Nd5	21610.6	-0.684139	0.108895	-6.28257	3.33e-10	2.95e-08	9.47752
ENSMUSG00000036427	Gpi1	17018.9	-0.147634	0.141597	-1.04264	0.297115	0.505585	0.527076
ENSMUSG00000060938	Rpl26	13221.6	-0.105587	0.0900473	-1.17257	0.240967	0.441139	0.618042
ENSMUSG00000046434	Hnrnpa1	16175.4	0.364815	0.122237	2.98448	0.0028406	0.0192739	2.54659
ENSMUSG00000061477	Rps7	13465.1	-0.113107	0.0831086	-1.36095	0.173529	0.354905	0.760627
ENSMUSG00000063457	Rps15	15612	0.00206931	0.0970475	0.0213226	0.982988	0.991151	0.00745165
ENSMUSG00000049517	Rps23	14608.6	0.0923469	0.100393	0.919855	0.357649	0.564457	0.446543
ENSMUSG00000020914	Top2a	20784.3	0.256113	0.0987576	2.59335	0.00950462	0.0465091	2.02207
ENSMUSG00000031004	Mki67	22756.1	0.00451175	0.0922365	0.0489151	0.960987	0.981579	0.0172825
ENSMUSG00000028234	Rps20	13689.5	-0.00836733	0.0918722	-0.0910757	0.927432	0.963601	0.0327177
ENSMUSG00000030432	Rpl28	15094.1	0.0871848	0.0928533	0.938952	0.347755	0.555428	0.458726
ENSMUSG00000028639	Ybx1	15761.9	0.402494	0.138028	2.91604	0.0035451	0.0226079	2.45037
ENSMUSG00000038274	Fau	13631.8	-0.234563	0.106313	-2.20635	0.0273598	0.0990676	1.56289
ENSMUSG00000012405	Rpl15	13290.8	0.111143	0.110407	1.00667	0.314092	0.522752	0.502944
ENSMUSG00000009927	Rps25	11963.8	0.0712488	0.108334	0.657676	0.510747	0.695352	0.291795
ENSMUSG00000025794	Rpl14	13924.4	0.129882	0.106793	1.21621	0.223904	0.420899	0.649938
ENSMUSG00000056201	Cfl1	17854.8	0.453398	0.123651	3.66676	0.000245648	0.0030758	3.60969
ENSMUSG00000030707	Coro1a	17055.4	0.199839	0.0939446	2.1272	0.0334038	0.11468	1.4762
ENSMUSG00000021356	Irf4	11207.2	0.662718	0.178156	3.71988	0.000199321	0.00264517	3.70045
ENSMUSG00000022443	Myh9	24138	-0.0881128	0.101687	-0.866511	0.38621	0.589845	0.413176
ENSMUSG00000001924	Uba1	16153.4	0.352915	0.116768	3.02235	0.00250818	0.0175561	2.60064
ENSMUSG00000015437	Gzmb	4308	-0.285472	0.394699	-0.723264	0.469518	0.661276	0.328348
ENSMUSG00000059796	Eif4a1	15914.9	0.462117	0.130211	3.54899	0.000386705	0.00432117	3.41262
ENSMUSG00000047215	Rpl9	12046.8	0.00918182	0.092945	0.0987876	0.921307	0.960524	0.0355957
ENSMUSG00000040952	Rps19	13002.8	0.0342477	0.0998619	0.34295	0.731636	0.852726	0.135705
ENSMUSG00000059291	Rpl11	11490.3	0.178352	0.110007	1.62128	0.104958	0.254298	0.978985
ENSMUSG00000064339	mt-Rnr2	12331.7	0.319728	0.119891	2.66681	0.00765745	0.0394474	2.11592
ENSMUSG00000018293	Pfn1	19406.6	0.338576	0.106776	3.17089	0.00151974	0.0121316	2.81823
ENSMUSG00000036371	Serbp1	13435.4	0.348158	0.129087	2.69707	0.00699518	0.0371277	2.1552
ENSMUSG00000008683	Rps15a	11495.2	-0.16917	0.0888403	-1.9042	0.0568841	0.16732	1.24501
ENSMUSG00000021109	Hif1a	8128.27	0.195649	0.110097	1.77706	0.0755588	0.203677	1.12171
ENSMUSG00000029076	Sdf4	8088.51	-0.061518	0.136695	-0.450038	0.652683	0.801317	0.185298
ENSMUSG00000025967	Eef1b2	11618	-0.0138922	0.100762	-0.137871	0.890342	0.944386	0.050443
ENSMUSG00000005610	Eif4g2	16197.9	0.357573	0.11662	3.06613	0.00216848	0.0158485	2.66385
ENSMUSG00000003153	Slc2a3	6424.05	-0.989966	0.449806	-2.20087	0.027745	0.100077	1.55682
ENSMUSG00000025428	Atp5a1	15413.6	0.361388	0.112759	3.20496	0.00135081	0.0110824	2.86941
ENSMUSG00000063870	Chd4	14700.3	-0.108593	0.0900871	-1.20542	0.228042	0.42586	0.641986
ENSMUSG00000039630	Hnrnpu	18548.4	0.232083	0.0937975	2.4743	0.0133498	0.0587804	1.87453
ENSMUSG00000068227	Il2rb	15006.7	0.25282	0.101291	2.49598	0.0125609	0.056378	1.90098
ENSMUSG00000032011	Thy1	17549.3	0.216002	0.0996828	2.1669	0.0302427	0.10681	1.51938
ENSMUSG00000026864	Hspa5	9799.43	0.456084	0.133395	3.41905	0.000628394	0.00621095	3.20177
ENSMUSG00000000184	Ccnd2	16233.5	-0.0672445	0.146792	-0.458093	0.646886	0.797569	0.189172
ENSMUSG00000020460	Rps27a	7242.78	0.659915	0.559493	1.17949	0.238204	0.437944	0.62305
ENSMUSG00000062006	Rpl34	9514.15	-0.14597	0.0913591	-1.59776	0.110096	0.263431	0.958229
ENSMUSG00000064337	mt-Rnr1	9216.17	1.12908	0.12836	8.79621	1.42e-18	6.09e-16	17.8492
ENSMUSG00000071415	Rpl23	10443.2	0.0215745	0.0974025	0.221499	0.824704	0.907813	0.0837018
ENSMUSG00000025508	Rplp2	12070.9	0.0917849	0.109308	0.839689	0.401083	0.60403	0.396766
ENSMUSG00000052837	Junb	11543.8	0.059588	0.12174	0.489469	0.62451	0.782026	0.204461
ENSMUSG00000033220	Rac2	16064.7	-0.0503824	0.0950287	-0.530181	0.595987	0.759955	0.224763
ENSMUSG00000028581	Laptm5	12398.5	-0.264767	0.104818	-2.52596	0.0115384	0.0533138	1.93785
ENSMUSG00000064345	mt-Nd2	16502	-0.362973	0.12161	-2.98474	0.00283823	0.0192739	2.54695
ENSMUSG00000073702	Rpl31	9821.02	0.113732	0.104392	1.08946	0.27595	0.481934	0.55917
ENSMUSG00000025130	P4hb	8241.47	0.178646	0.104869	1.70351	0.0884724	0.226566	1.05319
ENSMUSG00000064363	mt-Nd4	15117.2	-0.739537	0.100841	-7.33368	2.24e-13	3.41e-11	12.6499
ENSMUSG00000063316	Rpl27	11070.5	0.0939784	0.117491	0.799881	0.42378	0.62342	0.37286
ENSMUSG00000022797	Tfrc	17121	0.495874	0.152259	3.25679	0.00112681	0.00969774	2.94815
ENSMUSG00000026011	Ctla4	9019.11	-0.273247	0.103427	-2.64194	0.00824336	0.041808	2.0839
ENSMUSG00000028965	Tnfrsf9	8702.95	-0.275126	0.182186	-1.51014	0.131008	0.295191	0.882704
ENSMUSG00000023004	Tuba1b	17827.6	0.364616	0.134343	2.71406	0.00664631	0.0358059	2.17742
ENSMUSG00000032035	Ets1	10685.7	-0.458895	0.15811	-2.90239	0.00370333	0.0232721	2.43141
ENSMUSG00000033307	Mif	10426.1	-0.0317305	0.129249	-0.2455	0.806069	0.896472	0.0936276
ENSMUSG00000003429	Rps11	11496.3	0.0722403	0.0851011	0.848875	0.395951	0.598491	0.402359
ENSMUSG00000026832	Cytip	9989.54	0.069362	0.0918613	0.755073	0.450205	0.644379	0.346589
ENSMUSG00000021196	Pfkp	9861.99	0.188918	0.11709	1.61344	0.106649	0.257362	0.972042
ENSMUSG00000031207	Msn	14221.8	-0.201913	0.0906389	-2.22766	0.0259031	0.0953282	1.58665
ENSMUSG00000040747	Cd53	6445.38	-0.232709	0.106438	-2.18633	0.0287916	0.102707	1.54073
ENSMUSG00000019505	Ubb	10466.5	0.143639	0.0874578	1.64238	0.100511	0.24693	0.997787
ENSMUSG00000026341	Actr3	12394.6	0.252306	0.0875044	2.88335	0.0039347	0.0242307	2.40509
ENSMUSG00000011752	Pgam1	10619.3	0.19033	0.139125	1.36805	0.171297	0.351902	0.76625
ENSMUSG00000090862	Rps13	9877.03	0.0137906	0.0875968	0.157432	0.874904	0.936447	0.0580395
ENSMUSG00000027639	Samhd1	9528.27	-1.28156	0.19151	-6.69185	2.2e-11	2.44e-09	10.6568
ENSMUSG00000021546	Hnrnpk	13104.5	0.207969	0.0963102	2.15937	0.0308217	0.108215	1.51114
ENSMUSG00000027940	Tpm3	13533.3	0.251802	0.0956943	2.63132	0.00850551	0.0427694	2.0703
ENSMUSG00000075602	Ly6a	1756.38	0.589534	0.108159	5.45062	5.02e-08	2.59e-06	7.29936
ENSMUSG00000025647	Shisa5	15681.1	-0.712281	0.144587	-4.92632	8.38e-07	2.94e-05	6.07679
ENSMUSG00000045962	Wnk1	12872.7	0.0399721	0.0886598	0.450848	0.652099	0.801054	0.185687
ENSMUSG00000023927	Satb1	2675.52	0.0365984	0.185695	0.197089	0.843758	0.919447	0.0737822
ENSMUSG00000061983	Rps12	9903.51	-0.180205	0.13072	-1.37856	0.16803	0.347845	0.774613
ENSMUSG00000039191	Rbpj	14918.7	0.462423	0.142731	3.23981	0.00119609	0.0100909	2.92224
ENSMUSG00000068039	Tcp1	9737.95	0.312877	0.132891	2.35438	0.0185536	0.0747255	1.73157
ENSMUSG00000048758	Rpl29	9438.26	-0.143396	0.127955	-1.12067	0.262428	0.467087	0.58099
ENSMUSG00000001175	Calm1	15931.3	0.553014	0.130963	4.22268	2.41e-05	0.00050088	4.61724
ENSMUSG00000035105	Egln3	6440.58	-0.299498	0.204186	-1.4668	0.142432	0.311884	0.846393
ENSMUSG00000058655	Eif4b	11275.9	0.0148206	0.0873664	0.169637	0.865296	0.931196	0.0628354
ENSMUSG00000025132	Arhgdia	13401.8	0.429778	0.114988	3.73759	0.000185791	0.00250543	3.73098
ENSMUSG00000025982	Sf3b1	11824.8	-0.418366	0.122275	-3.42153	0.000622709	0.00616691	3.20571
ENSMUSG00000032562	Gnai2	11655.5	0.218311	0.0924321	2.36185	0.018184	0.07367	1.74031
ENSMUSG00000021831	Ero1l	6611.12	0.117372	0.194497	0.603468	0.546198	0.723477	0.26265
ENSMUSG00000029430	Ran	12138.7	0.576842	0.142799	4.03953	5.36e-05	0.00095022	4.27118
ENSMUSG00000024393	Prrc2a	13700	0.256223	0.107538	2.38263	0.0171893	0.0708794	1.76474
ENSMUSG00000023175	Bsg	8871.04	0.0215467	0.15472	0.139262	0.889243	0.943818	0.0509795
ENSMUSG00000061787	Rps17	8344.09	0.272286	0.127824	2.13015	0.0331589	0.114243	1.4794
ENSMUSG00000011179	Odc1	11055.3	0.0219922	0.138131	0.159213	0.873501	0.935687	0.0587364
ENSMUSG00000110631	Gm42047	10323.4	-0.152132	0.0978758	-1.55434	0.120103	0.279184	0.920446
ENSMUSG00000032231	Anxa2	7716.77	-0.0762194	0.143607	-0.53075	0.595592	0.759766	0.225051
ENSMUSG00000024991	Eif3a	10717.7	0.286748	0.111915	2.5622	0.0104011	0.0496311	1.98292
ENSMUSG00000046330	Rpl37a	8751.02	-0.043218	0.108832	-0.397108	0.691288	0.827785	0.160341
ENSMUSG00000028163	Nfkb1	10840	-0.00366714	0.0871401	-0.0420833	0.966432	0.984005	0.0148286
ENSMUSG00000020077	Srgn	4986.78	0.197449	0.136948	1.44179	0.149362	0.321008	0.82576
ENSMUSG00000045983	Eif4g1	13936.4	0.44568	0.128564	3.4666	0.000527091	0.00547556	3.27811
ENSMUSG00000034088	Hdlbp	8169.89	0.114048	0.127083	0.897435	0.369487	0.575661	0.432401
ENSMUSG00000001440	Kpnb1	10885.7	0.349823	0.116709	2.99741	0.00272283	0.0186428	2.56498
ENSMUSG00000025261	Huwe1	13270.9	-0.00263728	0.0894984	-0.0294673	0.976492	0.988333	0.0103314
ENSMUSG00000030830	Itgal	12140.9	0.00244291	0.0875483	0.0279036	0.977739	0.988568	0.00977705
ENSMUSG00000069833	Ahnak	14183	-1.01579	0.133705	-7.59726	3.02e-14	5.49e-12	13.5193
ENSMUSG00000026012	Cd28	5904.23	-0.654854	0.09749	-6.71714	1.85e-11	2.07e-09	10.7321
ENSMUSG00000020340	Cyfip2	7578.15	-0.035039	0.0832831	-0.420721	0.673959	0.815657	0.171367
ENSMUSG00000030103	Bhlhe40	7133.2	0.39889	0.138382	2.88253	0.0039449	0.0242516	2.40396
ENSMUSG00000020850	Prpf8	11668	0.22754	0.105221	2.16249	0.0305803	0.107599	1.51456
ENSMUSG00000020358	Hnrnpab	13904.8	0.629987	0.171946	3.66387	0.000248431	0.00309276	3.60479
ENSMUSG00000003814	Calr	11210.2	0.398525	0.137273	2.90315	0.00369425	0.0232441	2.43247
ENSMUSG00000028649	Macf1	14437.7	-0.757083	0.147711	-5.12544	2.97e-07	1.21e-05	6.52748
ENSMUSG00000030530	Furin	4461.67	0.0611003	0.146617	0.416734	0.676873	0.81749	0.169493
ENSMUSG00000061315	Naca	8562.78	0.0568297	0.0897457	0.633231	0.526583	0.707959	0.278533
ENSMUSG00000022961	Son	12029.4	-0.0845711	0.090588	-0.93358	0.35052	0.558069	0.455287
ENSMUSG00000040940	Arhgef1	11670	-0.463594	0.153516	-3.01985	0.00252904	0.0176365	2.59704
ENSMUSG00000037944	Ccr7	8889.69	-1.86038	0.128113	-14.5214	8.87e-48	4.45e-44	47.0523
ENSMUSG00000021660	Btf3	8051.3	0.154547	0.0922708	1.67493	0.0939477	0.236013	1.02711
ENSMUSG00000031805	Jak3	9712.51	-0.220947	0.0994038	-2.22273	0.0262342	0.0961943	1.58113
ENSMUSG00000032688	Malt1	3619.39	-0.227722	0.114622	-1.98672	0.0469532	0.146248	1.32833
ENSMUSG00000055065	Ddx17	11299.8	-0.145489	0.0915139	-1.5898	0.11188	0.266314	0.951248
ENSMUSG00000033685	Ucp2	12886.2	0.112704	0.0925372	1.21794	0.223248	0.420138	0.651212
ENSMUSG00000016319	Slc25a5	9592.75	0.391212	0.129023	3.0321	0.00242855	0.0172141	2.61465
ENSMUSG00000020048	Hsp90b1	8844.24	0.377387	0.123435	3.05738	0.00223284	0.0162014	2.65114
ENSMUSG00000059248	2024-09-09	12334.5	0.174018	0.0856272	2.03228	0.0421258	0.135066	1.37545
ENSMUSG00000028936	Rpl22	6769.77	-0.0871887	0.0943373	-0.924223	0.35537	0.561811	0.449319
ENSMUSG00000015165	Hnrnpl	9806.06	0.289235	0.105666	2.73726	0.00619541	0.0340465	2.20793
ENSMUSG00000031328	Flna	13428.5	0.0965069	0.0921629	1.04713	0.295038	0.502819	0.530123
ENSMUSG00000028465	Tln1	12045.2	-0.0466253	0.100499	-0.46394	0.642691	0.794903	0.191998
ENSMUSG00000057863	Rpl36	7341.19	0.215462	0.126033	1.70957	0.087345	0.22448	1.05876
ENSMUSG00000025980	Hspd1	10492.8	0.518348	0.17017	3.04606	0.00231865	0.016679	2.63477
ENSMUSG00000036698	Ago2	7500.6	-0.168038	0.0915538	-1.8354	0.0664466	0.186038	1.17753
ENSMUSG00000024740	Ddb1	10553	0.309425	0.116543	2.65504	0.00792983	0.0405131	2.10074
ENSMUSG00000022884	Eif4a2	7828.61	0.0398948	0.0862899	0.462335	0.643841	0.79552	0.191221
ENSMUSG00000058546	Rpl23a	7102.25	-0.0684133	0.0894314	-0.764981	0.444283	0.639854	0.352341
ENSMUSG00000007836	Hnrnpa0	10875	0.433762	0.107545	4.03329	5.5e-05	0.000971274	4.25962
ENSMUSG00000022285	Ywhaz	10388.9	0.18565	0.0974186	1.9057	0.0566896	0.166915	1.2465
ENSMUSG00000021957	Tkt	8821.12	0.385079	0.113393	3.39597	0.000683865	0.00661024	3.16503
ENSMUSG00000030748	Il4ra	9235.85	0.928955	0.121408	7.65152	1.99e-14	3.69e-12	13.702
ENSMUSG00000036478	Btg1	7970.49	-1.13047	0.133697	-8.45545	2.78e-17	8.91e-15	16.5559
ENSMUSG00000034024	Cct2	8509.86	0.307184	0.118713	2.58762	0.00966415	0.0470465	2.01484
ENSMUSG00000040225	Prrc2c	11129.9	-0.142628	0.0932346	-1.52978	0.126071	0.288677	0.899384
ENSMUSG00000023274	Cd4	11998.8	-0.202241	0.0884394	-2.28677	0.0222092	0.0851023	1.65347
ENSMUSG00000024661	Fth1	6234.44	-0.161446	0.0960588	-1.6807	0.0928218	0.234358	1.03235
ENSMUSG00000058600	Rpl30	5428.75	-0.573623	0.167274	-3.42923	0.000605287	0.00603404	3.21804
ENSMUSG00000025085	Ablim1	7035.8	-0.817175	0.156292	-5.22852	1.71e-07	7.55e-06	6.76733
ENSMUSG00000006498	Ptbp1	9894.23	0.284834	0.107493	2.64978	0.00805435	0.0410428	2.09397
ENSMUSG00000035242	Oaz1	9444.31	0.295312	0.122341	2.41384	0.0157855	0.0666041	1.80174
ENSMUSG00000024014	Pim1	7977.65	-0.23132	0.108756	-2.12697	0.0334225	0.11468	1.47596
ENSMUSG00000027184	Caprin1	9616.79	0.221532	0.105647	2.09691	0.0360016	0.121237	1.44368
ENSMUSG00000026655	Fam107b	6159.54	0.168432	0.0999006	1.686	0.0917957	0.232781	1.03718
ENSMUSG00000035202	Lars2	7395.34	0.490138	0.165246	2.96611	0.00301597	0.020164	2.52057
ENSMUSG00000054766	Set	10233.1	0.476375	0.132269	3.60155	0.000316328	0.00374889	3.49986
ENSMUSG00000006304	Arpc2	7696.97	0.0262197	0.083906	0.312489	0.754669	0.86704	0.122244
ENSMUSG00000005103	Wdr1	8457.84	0.453524	0.107178	4.23149	2.32e-05	0.000485003	4.63423
ENSMUSG00000031311	Nono	9171.08	0.167141	0.0831453	2.01022	0.0444074	0.140764	1.35254
ENSMUSG00000027248	Pdia3	9655.84	0.00347735	0.0910657	0.0381851	0.96954	0.985407	0.0134342
ENSMUSG00000020849	Ywhae	8802.21	0.256435	0.111787	2.29395	0.0217933	0.0838927	1.66168
ENSMUSG00000033161	Atp1a1	12745.8	0.434351	0.0983896	4.4146	1.01e-05	0.000242341	4.99483
ENSMUSG00000021486	Prelid1	8170.12	0.125642	0.107361	1.17028	0.24189	0.442179	0.616382
ENSMUSG00000021910	Nisch	8262.82	-0.246251	0.0878271	-2.80382	0.00505018	0.0292131	2.29669
ENSMUSG00000034160	Ogt	9236.71	-0.847274	0.163265	-5.18955	2.11e-07	9.07e-06	6.67614
ENSMUSG00000068220	Lgals1	11484.8	0.467387	0.133313	3.50593	0.00045501	0.00489208	3.34198
ENSMUSG00000055805	Fmnl1	8495.85	-0.16129	0.100322	-1.60773	0.107895	0.259628	0.966997
ENSMUSG00000030738	Eif3c	8622.65	0.303349	0.121962	2.48723	0.012874	0.0574583	1.89029
ENSMUSG00000078578	Ube2d3	7585.59	0.0934084	0.089958	1.03836	0.299104	0.507823	0.524177
ENSMUSG00000079641	Rpl39	5811.81	0.0389386	0.100641	0.386905	0.698827	0.831997	0.15563
ENSMUSG00000062997	Rpl35	6239.16	0.0951335	0.115923	0.820659	0.411841	0.613121	0.385271
ENSMUSG00000030057	Cnbp	8682.3	0.274868	0.116507	2.35924	0.0183125	0.074071	1.73725
ENSMUSG00000035697	Arhgap45	9551.84	-0.796199	0.176342	-4.51509	6.33e-06	0.000162962	5.19867
ENSMUSG00000031765	Mt1	2266.29	-0.932655	0.202794	-4.59903	4.24e-06	0.00011667	5.37217
ENSMUSG00000026463	Atp2b4	4052.39	0.323627	0.0937901	3.45054	0.000559461	0.00569788	3.25223
ENSMUSG00000022475	Hdac7	6051.7	-0.34404	0.113553	-3.02978	0.0024473	0.0172821	2.61131
ENSMUSG00000026358	Rgs1	2941.32	0.180615	0.119663	1.50936	0.131207	0.295333	0.882044
ENSMUSG00000058799	Nap1l1	8741.34	0.284543	0.112948	2.51923	0.0117613	0.0538973	1.92954
ENSMUSG00000037012	Hk1	6130.94	0.00851197	0.115757	0.0735332	0.941382	0.971166	0.0262342
ENSMUSG00000027620	Rbm39	7018.23	-0.135394	0.0890077	-1.52114	0.128224	0.291572	0.892032
ENSMUSG00000028270	Gbp2	776.825	-2.40257	0.148948	-16.1302	1.56e-58	2.36e-54	57.8057
ENSMUSG00000004040	Stat3	6321.71	-0.0723638	0.0972372	-0.744199	0.456756	0.649681	0.340316
ENSMUSG00000030091	Nup210	9204.34	0.217683	0.0852722	2.5528	0.0106861	0.0505067	1.97118
ENSMUSG00000026547	Tagln2	8439.54	0.276149	0.11422	2.4177	0.0156191	0.06605	1.80634
ENSMUSG00000021451	Sema4d	6173.05	-0.00347129	0.110701	-0.0313573	0.974985	0.988038	0.0110022
ENSMUSG00000022234	Cct5	7725.73	0.339479	0.128061	2.65091	0.00802754	0.0409574	2.09542
ENSMUSG00000032966	Fkbp1a	6490.63	0.169646	0.127652	1.32897	0.183857	0.368815	0.735521
ENSMUSG00000022463	Srebf2	9077.65	0.179001	0.0987143	1.81332	0.0697819	0.192443	1.15626
ENSMUSG00000030232	Aebp2	7014.78	0.0700744	0.0978749	0.715958	0.474017	0.665001	0.324206
ENSMUSG00000041959	S100a10	6994.65	-0.35102	0.113269	-3.09898	0.00194186	0.0146105	2.71178
ENSMUSG00000048076	Arf1	7173.49	0.234974	0.114152	2.05843	0.0395485	0.129336	1.40287
ENSMUSG00000022312	Eif3h	6505.38	-0.0692765	0.0819891	-0.844947	0.39814	0.600781	0.399964
ENSMUSG00000018340	Anxa6	6831.56	0.247243	0.099573	2.48303	0.0130269	0.0579382	1.88516
ENSMUSG00000000409	Lck	8488.62	0.0755733	0.0883476	0.855409	0.392325	0.595365	0.406354
ENSMUSG00000062328	Rpl17	5891.11	0.342592	0.140369	2.44066	0.0146605	0.0631123	1.83385
ENSMUSG00000016528	Mapkapk2	5111.22	0.708951	0.149098	4.75494	1.99e-06	6.22e-05	5.70223
ENSMUSG00000055447	Cd47	7912.32	0.047479	0.103549	0.458515	0.646582	0.797569	0.189376
ENSMUSG00000022314	Rad21	7613	0.110829	0.0943313	1.17489	0.240038	0.440026	0.619719
ENSMUSG00000018583	G3bp1	9771.63	0.35168	0.123453	2.8487	0.00438977	0.0262835	2.35756
ENSMUSG00000039936	Pik3cd	7240.84	-0.287674	0.11791	-2.43978	0.0146961	0.0632116	1.8328
ENSMUSG00000028820	Sfpq	8991.6	0.0855526	0.10043	0.851865	0.394289	0.597082	0.404185
ENSMUSG00000030007	Cct7	7817.39	0.509654	0.136684	3.72871	0.000192462	0.00258383	3.71565
ENSMUSG00000003847	Nfat5	8751.8	-0.715111	0.0992391	-7.20594	5.76e-13	8.18e-11	12.2392
ENSMUSG00000021218	Gdi2	7851.7	-0.101284	0.0869026	-1.16549	0.243819	0.444351	0.612932
ENSMUSG00000061904	Slc25a3	7717.68	0.215709	0.101797	2.11902	0.0340888	0.116421	1.46739
ENSMUSG00000024576	Csnk1a1	7592.65	0.0753127	0.0910114	0.827508	0.407949	0.609254	0.389394
ENSMUSG00000020368	Canx	7849.15	0.44055	0.119245	3.69448	0.000220336	0.00285131	3.65691
ENSMUSG00000066036	Ubr4	8760.89	-0.0912107	0.0998671	-0.913321	0.361074	0.567908	0.442404
ENSMUSG00000007850	Hnrnph1	9492.13	0.172954	0.0948504	1.82344	0.0682365	0.18943	1.16598
ENSMUSG00000090733	Rps27	4730.46	0.0302974	0.128037	0.23663	0.812944	0.900395	0.0899395
ENSMUSG00000030536	Iqgap1	10139.3	0.0117801	0.0864682	0.136237	0.891634	0.945099	0.0498133
ENSMUSG00000027763	Mbnl1	10453.9	-0.182438	0.110804	-1.64649	0.099663	0.245499	1.00147
ENSMUSG00000054717	Hmgb2	9218.63	0.319873	0.102022	3.13534	0.00171658	0.013294	2.76534
ENSMUSG00000006699	Cdc42	8480.08	0.211263	0.0941108	2.24483	0.0247789	0.0922504	1.60592
ENSMUSG00000025153	Fasn	10407.4	0.630247	0.130153	4.84236	1.28e-06	4.26e-05	5.89175
ENSMUSG00000026219	Trip12	8560.33	0.0146911	0.0850432	0.172749	0.862849	0.929825	0.0640652
ENSMUSG00000051695	Pcbp1	8146.38	0.318044	0.121904	2.60897	0.00908144	0.0448357	2.04185
ENSMUSG00000040945	Rcc2	9927.47	0.361759	0.108065	3.34762	0.000815096	0.00760705	3.08879
ENSMUSG00000018654	Ikzf1	8281.87	-0.20065	0.0959418	-2.09137	0.036495	0.122403	1.43777
ENSMUSG00000034349	Smc4	10320.6	-0.423578	0.14346	-2.95259	0.00315124	0.0208237	2.50152
ENSMUSG00000017707	Serinc3	10216.1	-0.246949	0.122592	-2.01439	0.0439687	0.139696	1.35686
ENSMUSG00000079435	Rpl36a	5185.02	0.105888	0.10828	0.977906	0.328121	0.536818	0.483966
ENSMUSG00000048578	Mlec	8945.65	0.0157767	0.0931267	0.169411	0.865473	0.931222	0.0627463
ENSMUSG00000015937	H2afy	6263.87	-0.20587	0.115361	-1.78457	0.0743313	0.201508	1.12883
ENSMUSG00000020152	Actr2	7799.78	0.396838	0.0932844	4.25407	2.1e-05	0.000442237	4.67795
ENSMUSG00000037894	H2afz	8634.53	0.436837	0.121407	3.59811	0.000320541	0.00378394	3.49412
ENSMUSG00000001847	Rac1	6827.78	0.108579	0.0831067	1.3065	0.191383	0.379317	0.718096
ENSMUSG00000020917	Acly	6773.94	0.538995	0.105794	5.09477	3.49e-07	1.38e-05	6.45696
ENSMUSG00000025613	Cct8	7501.17	0.460276	0.135318	3.40145	0.000670297	0.0065056	3.17373
ENSMUSG00000020612	Prkar1a	8178.84	0.0061483	0.0812249	0.0756948	0.939662	0.970173	0.0270284
ENSMUSG00000004043	Stat5a	3821.04	0.00801426	0.123875	0.0646964	0.948416	0.974953	0.0230012
ENSMUSG00000042079	Hnrnpf	8255.59	0.318558	0.0927095	3.43609	0.000590182	0.00593848	3.22901
ENSMUSG00000071172	Srsf3	7783.82	0.366194	0.115166	3.17971	0.00147422	0.0118433	2.83144
ENSMUSG00000060373	Hnrnpc	6820.34	0.23884	0.113974	2.09557	0.03612	0.1215	1.44225
ENSMUSG00000037331	Larp1	9137.08	0.234952	0.122901	1.91172	0.0559119	0.165241	1.2525
ENSMUSG00000036550	Cnot1	8458.36	0.0276376	0.0903406	0.305926	0.759661	0.869517	0.11938
ENSMUSG00000031029	Eif3f	6602.35	-0.0972196	0.0955294	-1.01769	0.308824	0.517789	0.510289
ENSMUSG00000022565	Plec	9420.83	-0.264945	0.104259	-2.54122	0.0110466	0.0516359	1.95677
ENSMUSG00000028333	Anp32b	8319.38	0.317134	0.0996007	3.18406	0.00145226	0.0117043	2.83796
ENSMUSG00000032637	Atxn2l	6690.21	0.12385	0.0898938	1.37774	0.168283	0.348005	0.77396
ENSMUSG00000028793	Rnf19b	5827.34	1.17727	0.181587	6.48322	8.98e-11	8.96e-09	10.0468
ENSMUSG00000038014	Fam120a	8152.14	0.115952	0.083802	1.38365	0.166467	0.345669	0.778673
ENSMUSG00000024359	Hspa9	6944.53	0.559269	0.150198	3.72354	0.000196452	0.00262569	3.70674
ENSMUSG00000020190	Mknk2	9083.32	-0.0970277	0.088717	-1.09368	0.274097	0.479693	0.562096
ENSMUSG00000024965	Fermt3	6718.52	0.151199	0.0873214	1.73152	0.0833589	0.217351	1.07905
ENSMUSG00000040385	Ppp1ca	7789.81	0.294942	0.0921247	3.20156	0.00136687	0.0111776	2.86427
ENSMUSG00000067212	H2-T23	5374.59	-0.161849	0.0865481	-1.87005	0.0614771	0.176509	1.21129
ENSMUSG00000016559	H3f3b	8520.72	0.0844736	0.0840614	1.0049	0.314944	0.523216	0.501767
ENSMUSG00000017493	Igfbp4	5597.59	-0.398081	0.165787	-2.40116	0.016343	0.068325	1.78667
ENSMUSG00000038612	Mcl1	6471.47	-0.565717	0.0969081	-5.83766	5.29e-09	3.47e-07	8.27623
ENSMUSG00000047126	Cltc	8077.17	0.196406	0.115073	1.70679	0.0878617	0.225424	1.0562
ENSMUSG00000054808	Actn4	8628.99	0.267935	0.101688	2.63489	0.00841654	0.042415	2.07487
ENSMUSG00000024669	Cd5	6352.73	-0.477463	0.122822	-3.88743	0.000101309	0.00156837	3.99435
ENSMUSG00000021242	Npc2	3858.82	-0.482637	0.105649	-4.56831	4.92e-06	0.000131139	5.30832
ENSMUSG00000020437	Myo1g	7844.43	-0.00657037	0.0862933	-0.07614	0.939308	0.970023	0.0271921
ENSMUSG00000041841	Rpl37	5047.63	0.209036	0.139461	1.49889	0.133903	0.299389	0.873209
ENSMUSG00000003226	Ranbp2	6298.27	0.131835	0.104568	1.26076	0.207396	0.400771	0.683199
ENSMUSG00000004099	Dnmt1	9499.82	0.328518	0.0952035	3.4507	0.000559143	0.00569788	3.25248
ENSMUSG00000027863	Cd2	7528.77	0.0330241	0.0998149	0.330854	0.740755	0.858373	0.130325
ENSMUSG00000038437	Mllt6	7590.73	0.0837662	0.095821	0.874195	0.382012	0.586689	0.417923
ENSMUSG00000028656	Cap1	7537.15	0.161255	0.0878203	1.8362	0.0663285	0.185811	1.1783
ENSMUSG00000062647	Rpl7a	5004.81	0.0211071	0.170488	0.123804	0.90147	0.949769	0.0450485
ENSMUSG00000020919	Stat5b	5777.13	-0.252391	0.0978324	-2.57983	0.00988503	0.0478465	2.00502
ENSMUSG00000041235	Chd7	2192.94	1.13861	0.113618	10.0214	1.23e-23	9.73e-21	22.9111
ENSMUSG00000027597	Ahcy	3887.91	0.149883	0.124203	1.20676	0.227524	0.425157	0.642973
ENSMUSG00000022587	Ly6e	10699.8	0.269243	0.121179	2.22186	0.0262931	0.0963867	1.58016
ENSMUSG00000018379	Srsf1	9054.64	0.265651	0.0986708	2.6923	0.00709615	0.037573	2.14898
ENSMUSG00000029075	Tnfrsf4	5351.81	0.0247694	0.129341	0.191505	0.84813	0.921969	0.0715377
ENSMUSG00000038650	Rnh1	2667.78	0.0793294	0.132335	0.599457	0.548868	0.725377	0.260532
ENSMUSG00000034165	Ccnd3	7763.64	0.446356	0.145453	3.06873	0.00214971	0.0157495	2.66762
ENSMUSG00000000787	Ddx3x	8494.77	0.219417	0.120744	1.8172	0.0691858	0.191255	1.15998
ENSMUSG00000032249	Anp32a	6432.58	0.037315	0.0976535	0.382117	0.702375	0.834704	0.153431
ENSMUSG00000007041	Clic1	6559.08	0.136466	0.0888053	1.53669	0.124369	0.286142	0.905287
ENSMUSG00000024858	Grk2	8524.22	0.163455	0.0823985	1.98371	0.0472877	0.147104	1.32525
ENSMUSG00000024073	Birc6	8270.93	-0.146627	0.100729	-1.45565	0.145489	0.316005	0.837171
ENSMUSG00000029622	Arpc1b	6383.94	0.182701	0.094288	1.93769	0.0526606	0.158677	1.27851
ENSMUSG00000030662	Ipo5	6943.79	0.349427	0.133117	2.62497	0.00866572	0.0433641	2.0622
ENSMUSG00000031799	Tpm4	7022.32	0.00908678	0.0923485	0.0983966	0.921617	0.960581	0.0354494
ENSMUSG00000051457	Spn	7778.33	-0.0531712	0.0962496	-0.55243	0.580654	0.74999	0.236083
ENSMUSG00000001472	Tcf25	5905.34	-0.181476	0.095375	-1.90277	0.0570712	0.167772	1.24358
ENSMUSG00000029447	Cct6a	7348.61	0.551555	0.158324	3.48372	0.000494497	0.00519428	3.30584
ENSMUSG00000005566	Trim28	7549.04	0.25766	0.105011	2.45365	0.0141413	0.0614909	1.84951
ENSMUSG00000000290	Itgb2	8063.97	-0.0368506	0.0836313	-0.440632	0.65948	0.805839	0.180799
ENSMUSG00000001588	Acap1	5278.63	-0.305033	0.130301	-2.34098	0.0192331	0.0768254	1.71595
ENSMUSG00000004897	Hdgf	7040.74	0.28156	0.129133	2.18038	0.0292293	0.103987	1.53418
ENSMUSG00000007739	Cct4	5936.31	0.302238	0.120669	2.50469	0.0122559	0.0553885	1.91166
ENSMUSG00000027215	Cd82	6487.16	0.417192	0.128242	3.25317	0.00114126	0.00978732	2.94262
ENSMUSG00000024789	Jak2	5346.55	-0.136513	0.0952823	-1.43272	0.151937	0.324673	0.818337
ENSMUSG00000054823	Nsd3	4654.92	-0.553153	0.133916	-4.1306	3.62e-05	0.000692521	4.4415
ENSMUSG00000043535	Setx	6169.48	-0.321638	0.116909	-2.75118	0.00593819	0.0329454	2.22635
ENSMUSG00000060636	Rpl35a	4803.9	0.154857	0.143363	1.08018	0.280063	0.486528	0.552745
ENSMUSG00000054452	Aes	7665.14	0.311091	0.101552	3.06337	0.00218863	0.0159648	2.65983
ENSMUSG00000026553	Copa	6367.35	0.0322256	0.0878659	0.366759	0.713799	0.842036	0.146424
ENSMUSG00000024949	Sf1	7622.68	0.164455	0.0887842	1.8523	0.0639827	0.18116	1.19394
ENSMUSG00000001131	Timp1	193.339	0.197352	0.541525	0.364437	0.715531	0.842938	0.145371
ENSMUSG00000037820	Tgm2	4492.13	1.2549	0.356218	3.52284	0.000426954	0.00466649	3.36962
ENSMUSG00000023010	Tmbim6	6616.3	0.143311	0.0893045	1.60474	0.10855	0.260831	0.964368
ENSMUSG00000020395	Itk	5564.5	0.0237138	0.107399	0.220802	0.825247	0.908145	0.0834161
ENSMUSG00000021794	Glud1	8423.17	-0.0480057	0.126387	-0.379832	0.70407	0.835806	0.152384
ENSMUSG00000019961	Tmpo	8319.13	0.194101	0.0863435	2.24801	0.0245756	0.0916521	1.6095
ENSMUSG00000007029	Vars	8186.18	0.206086	0.0905092	2.27697	0.0227882	0.0868352	1.64229
ENSMUSG00000070372	Capza1	5973.74	0.0374708	0.104103	0.359938	0.718893	0.844894	0.143336
ENSMUSG00000024402	Lta	9782.6	0.616796	0.210103	2.93568	0.00332817	0.0216707	2.47779
ENSMUSG00000020611	Gna13	5601.74	-0.215462	0.0918032	-2.347	0.0189252	0.0759559	1.72296
ENSMUSG00000113948	Rpl17-ps3	4929.72	-0.236161	0.0988322	-2.38952	0.0168706	0.0699482	1.77287
ENSMUSG00000027067	Ssrp1	6948.68	0.337788	0.11778	2.86796	0.0041313	0.0250926	2.38391
ENSMUSG00000029823	Luc7l2	6632.13	-0.170263	0.120648	-1.41123	0.158176	0.333932	0.80086
ENSMUSG00000001248	Gramd1a	3764.7	-0.447778	0.1555	-2.8796	0.00398175	0.0244306	2.39993
ENSMUSG00000038252	Ncapd2	8079.67	0.0906256	0.0953724	0.950228	0.341996	0.55032	0.465979
ENSMUSG00000031167	Rbm3	5766.22	0.363939	0.105199	3.45951	0.000541149	0.00559076	3.26668
ENSMUSG00000029467	Atp2a2	7565.18	0.412057	0.129221	3.18876	0.00142883	0.0115774	2.84502
ENSMUSG00000056076	Eif3b	7644.69	0.516814	0.145687	3.54743	0.000389012	0.00434372	3.41004
ENSMUSG00000009687	Fxyd5	4935.77	-0.412418	0.0921463	-4.47568	7.62e-06	0.000190266	5.11823
ENSMUSG00000040725	Hnrnpul1	6975.03	0.162633	0.0841335	1.93303	0.0532322	0.159792	1.27383
ENSMUSG00000056851	Pcbp2	5997.32	0.0550508	0.0880725	0.625063	0.53193	0.712472	0.274146
ENSMUSG00000030655	Smg1	6796.73	-0.22058	0.102701	-2.14778	0.031731	0.11041	1.49852
ENSMUSG00000057666	Gapdh	4395.67	-0.0345955	0.965635	-0.0358267	0.971421	0.986417	0.0125927
ENSMUSG00000026355	Mcm6	8112.51	0.175322	0.110133	1.5919	0.111406	0.265566	0.95309
ENSMUSG00000026009	Icos	4380.92	-0.139395	0.118253	-1.17879	0.238483	0.437975	0.622542
ENSMUSG00000020361	Hspa4	7486.48	0.336576	0.13535	2.4867	0.0128933	0.0575103	1.88964
ENSMUSG00000025364	Pa2g4	6615.8	0.495122	0.143454	3.45144	0.0005576	0.00568661	3.25368
ENSMUSG00000027828	Ssr3	3912.12	0.192546	0.103683	1.85707	0.0633014	0.179892	1.19859
ENSMUSG00000025357	Dgka	8402.39	-1.30395	0.180944	-7.2064	5.75e-13	8.18e-11	12.2407
ENSMUSG00000024670	Cd6	5080.1	-0.272094	0.116295	-2.33969	0.0192997	0.0769894	1.71445
ENSMUSG00000025366	Esyt1	7181.72	0.330181	0.0853349	3.86923	0.000109178	0.00167129	3.96187
ENSMUSG00000066232	Ipo7	4893.17	0.493893	0.134867	3.66208	0.000250175	0.00310667	3.60176
ENSMUSG00000066406	Akap13	6027.65	-0.602538	0.12458	-4.83655	1.32e-06	4.36e-05	5.87906
ENSMUSG00000027423	Snx5	4753.91	0.248424	0.114361	2.17227	0.0298353	0.105718	1.52527
ENSMUSG00000030220	Arhgdib	6705.16	0.109964	0.116859	0.940994	0.346708	0.554537	0.460036
ENSMUSG00000048154	Kmt2d	7092.16	-0.299605	0.147208	-2.03526	0.0418251	0.134503	1.37856
ENSMUSG00000022336	Eif3e	4707.64	-0.0173482	0.0965042	-0.179766	0.857336	0.926402	0.066849
ENSMUSG00000030978	Rrm1	8218.52	0.359312	0.110042	3.26522	0.00109378	0.0094809	2.96107
ENSMUSG00000024425	Ndfip1	6782.23	0.2183	0.0948249	2.30214	0.0213274	0.082621	1.67106
ENSMUSG00000076498	Trbc2	6975.93	-0.242316	0.117535	-2.06166	0.0392399	0.128606	1.40627
ENSMUSG00000028452	Vcp	7178.76	0.282003	0.127768	2.20716	0.027303	0.0989218	1.56379
ENSMUSG00000043962	Thrap3	6867.8	0.0894437	0.0908179	0.984869	0.324689	0.532955	0.488533
ENSMUSG00000028788	Ptp4a2	6361.15	-0.0816178	0.0903934	-0.902918	0.36657	0.57304	0.435844
ENSMUSG00000009079	Ewsr1	6941.53	0.209882	0.0905513	2.31782	0.020459	0.0801702	1.68912
ENSMUSG00000029826	Zc3hav1	6904.07	-0.582813	0.121022	-4.81577	1.47e-06	4.78e-05	5.83377
ENSMUSG00000019432	Ddx39b	7182.03	0.216657	0.0926051	2.33957	0.0193057	0.0769928	1.71431
ENSMUSG00000018707	Dync1h1	7805.88	0.0601393	0.0913716	0.658184	0.51042	0.695222	0.292072
ENSMUSG00000063511	Snrnp70	7313.69	-0.0456311	0.0962469	-0.474105	0.635425	0.789524	0.196936
ENSMUSG00000037447	Arid5a	4255.49	0.64541	0.092339	6.98957	2.76e-12	3.52e-10	11.5595
ENSMUSG00000039262	Prrc2b	7292.01	-0.208315	0.110217	-1.89004	0.058752	0.170862	1.23098
ENSMUSG00000031386	Hcfc1	7631.25	0.254972	0.107468	2.37254	0.0176662	0.0723114	1.75286
ENSMUSG00000030654	Arl6ip1	8014.1	0.230391	0.0854479	2.69628	0.00701193	0.0372035	2.15416
ENSMUSG00000022378	Fam49b	3615.04	0.0703781	0.0865974	0.812705	0.416387	0.617631	0.380502
ENSMUSG00000037400	Atp11b	4376.56	-0.386471	0.127534	-3.03034	0.00244275	0.0172747	2.61212
ENSMUSG00000039264	Gimap3	5984.98	-0.786552	0.332021	-2.36898	0.0178371	0.0727736	1.74868
ENSMUSG00000040731	Eif4h	7238	0.355958	0.117691	3.02451	0.00249033	0.0174636	2.60374
ENSMUSG00000041515	Irf8	4140.28	-0.281329	0.149565	-1.88098	0.0599747	0.173264	1.22203
ENSMUSG00000031229	Atrx	8223.41	-0.269382	0.0855764	-3.14786	0.00164473	0.0128632	2.78391
ENSMUSG00000021282	Eif5	6096.56	0.181642	0.0947692	1.91668	0.055279	0.163782	1.25744
ENSMUSG00000032097	Ddx6	6550.78	-0.131596	0.0951187	-1.38349	0.166514	0.345672	0.77855
ENSMUSG00000090841	Myl6	5224.18	0.284222	0.113472	2.50477	0.012253	0.0553885	1.91176
ENSMUSG00000020402	Vdac1	5358.03	0.319596	0.128833	2.4807	0.0131124	0.0581946	1.88232
ENSMUSG00000035247	Hectd1	4692.43	-0.0785776	0.0928305	-0.846464	0.397294	0.600064	0.400888
ENSMUSG00000002748	Baz1b	7225.88	0.0449324	0.0876201	0.512809	0.608085	0.769196	0.216036
ENSMUSG00000020290	Xpo1	6589.37	0.316867	0.10622	2.98313	0.00285319	0.0193418	2.54467
ENSMUSG00000020349	Ppp2ca	5677.33	0.300031	0.109434	2.74166	0.00611301	0.0336802	2.21374
ENSMUSG00000030189	Ybx3	5735.38	0.44413	0.144609	3.07126	0.00213158	0.0156601	2.6713
ENSMUSG00000027342	Pcna	6766.61	0.36376	0.126041	2.88606	0.003901	0.0240781	2.40882
ENSMUSG00000051413	Plagl2	5111.8	-0.296642	0.120497	-2.46182	0.0138232	0.0604235	1.85939
ENSMUSG00000026875	Traf1	3786.74	-0.605489	0.094511	-6.40654	1.49e-10	1.39e-08	9.82723
ENSMUSG00000038467	Chmp4b	3544.28	0.123124	0.105318	1.16907	0.242376	0.442535	0.61551
ENSMUSG00000006005	Tpr	7109.88	-0.062762	0.0975997	-0.643055	0.520188	0.703249	0.283839
ENSMUSG00000037266	Rsrp1	6173.56	-0.767101	0.164517	-4.66276	3.12e-06	8.97e-05	5.50584
ENSMUSG00000059208	Hnrnpm	7436.89	0.317207	0.104833	3.02583	0.00247954	0.0174123	2.60563
ENSMUSG00000060743	H3f3a	6330.75	-0.131666	0.0941643	-1.39826	0.162035	0.339707	0.790392
ENSMUSG00000028530	Jak1	6256.53	-0.383476	0.122627	-3.12718	0.00176493	0.0135707	2.75327
ENSMUSG00000048163	Selplg	6311.59	-0.496531	0.129263	-3.84126	0.000122404	0.00180585	3.9122
ENSMUSG00000041560	Nop53	4415.57	-0.164231	0.103794	-1.58228	0.113586	0.269016	0.944676
ENSMUSG00000025161	Slc16a3	5610.26	0.0710153	0.132087	0.53764	0.590826	0.756641	0.228541
ENSMUSG00000023845	Lnpep	5542.97	-0.441059	0.105722	-4.17189	3.02e-05	0.000599417	4.51986
ENSMUSG00000029472	Anapc5	6525.92	0.207845	0.101433	2.04908	0.0404539	0.131327	1.39304
ENSMUSG00000041642	Kif21b	7080.09	-0.838971	0.194561	-4.31213	1.62e-05	0.000359747	4.79133
ENSMUSG00000055170	Ifng	184.277	1.47832	0.635109	2.32767	0.0199295	0.0787303	1.7005
ENSMUSG00000037487	Ubr5	5686.72	-0.0425442	0.0988712	-0.430299	0.666978	0.810783	0.175888
ENSMUSG00000099764	Rps10-ps2	4424.94	-0.0395643	0.0880444	-0.449368	0.653166	0.801715	0.184976
ENSMUSG00000040479	Dgkz	7823.89	-0.27046	0.104	-2.60057	0.00930683	0.0457207	2.0312
ENSMUSG00000069682	Gm10275	3822.27	0.0444397	0.0913428	0.486516	0.626602	0.783607	0.203008
ENSMUSG00000030795	Fus	7146.27	0.289245	0.0918633	3.14864	0.0016403	0.0128419	2.78508
ENSMUSG00000095597	Gm6472	4165.89	-0.217192	0.0962365	-2.25686	0.0240169	0.0902624	1.61948
ENSMUSG00000040463	Mybbp1a	7063.56	0.54984	0.160077	3.43485	0.000592881	0.00596166	3.22703
ENSMUSG00000051223	Bzw1	6495.62	0.269498	0.115474	2.33385	0.0196035	0.0777481	1.70767
ENSMUSG00000027540	Ptpn1	7178.69	0.352416	0.11782	2.99113	0.00277943	0.0189699	2.55604
ENSMUSG00000028745	Capzb	5542.65	0.247686	0.106664	2.3221	0.0202275	0.079532	1.69406
ENSMUSG00000035530	Eif1	5168.5	0.117932	0.105636	1.1164	0.264252	0.46889	0.577982
ENSMUSG00000057738	Sptan1	6537.28	-0.135683	0.0868498	-1.56227	0.118224	0.276437	0.927295
ENSMUSG00000036752	Tubb4b	8355.98	0.31288	0.120051	2.60624	0.00915432	0.0451659	2.03837
ENSMUSG00000028645	Slc2a1	3438.88	0.0722658	0.135753	0.532332	0.594496	0.759004	0.225851
ENSMUSG00000026074	Map4k4	5316.87	-0.34205	0.0884503	-3.86715	0.000110117	0.00168224	3.95815
ENSMUSG00000042699	Dhx9	6863.06	0.192907	0.104968	1.83776	0.066097	0.185404	1.17982
ENSMUSG00000018501	Ncor1	6268.14	-0.106333	0.0873587	-1.2172	0.223529	0.420509	0.650666
ENSMUSG00000052681	Rap1b	6510.66	0.204438	0.100281	2.03865	0.0414851	0.133809	1.38211
ENSMUSG00000029064	Gnb1	6077.48	0.294191	0.102394	2.87312	0.00406442	0.0248065	2.391
ENSMUSG00000022477	Aco2	6319.96	0.486497	0.13204	3.68448	0.000229173	0.00292781	3.63984
ENSMUSG00000035569	Ankrd11	5587.29	-0.143896	0.119944	-1.1997	0.230256	0.428509	0.637788
ENSMUSG00000028809	Srrm1	5694.85	0.208461	0.0981432	2.12405	0.0336661	0.115305	1.47281
ENSMUSG00000005683	Cs	5509.72	0.487574	0.114013	4.27648	1.9e-05	0.000407995	4.72154
ENSMUSG00000034394	Lif	5471.38	2.25517	0.2026	11.1311	8.85e-29	1.67e-25	28.0529
ENSMUSG00000020075	Ddx21	5917.03	0.459999	0.145735	3.15641	0.00159723	0.0125925	2.79663
ENSMUSG00000010277	2610507B11Rik	6805.56	0.238854	0.0941546	2.53683	0.0111861	0.0521176	1.95132
ENSMUSG00000006998	Psmd2	6030.24	0.395849	0.122971	3.21904	0.00128621	0.0106804	2.89069
ENSMUSG00000064368	mt-Nd6	6391.38	-0.595995	0.117462	-5.07396	3.9e-07	1.52e-05	6.40935
ENSMUSG00000044783	Hjurp	6331.76	-0.0362157	0.115789	-0.312773	0.754453	0.867002	0.122368
ENSMUSG00000004535	Tax1bp1	4060.07	0.0903677	0.0917224	0.985231	0.324511	0.532955	0.488771
ENSMUSG00000005198	Polr2a	6834.56	-0.0059136	0.0963525	-0.0613746	0.951061	0.976275	0.0217917
ENSMUSG00000004455	Ppp1cc	5494.61	0.222018	0.0866947	2.56092	0.0104397	0.0497163	1.98131
ENSMUSG00000001416	Cct3	6152.82	0.488266	0.148254	3.29343	0.000989717	0.00884754	3.00449
ENSMUSG00000041028	Ghitm	4406.27	0.000627462	0.116934	0.00536594	0.995719	0.997584	0.00186337
ENSMUSG00000039361	Picalm	3098.41	0.246776	0.090735	2.71974	0.00653328	0.035336	2.18487
ENSMUSG00000025225	Nfkb2	5876.55	-0.170999	0.157656	-1.08464	0.278082	0.484417	0.555827
ENSMUSG00000063015	Ccni	5254.09	-0.553177	0.134946	-4.09925	4.14e-05	0.000772569	4.38249
ENSMUSG00000067038	Rps12-ps3	4341.13	-0.256719	0.101883	-2.51975	0.0117437	0.0538657	1.9302
ENSMUSG00000052397	Ezr	6950.95	0.272865	0.0977526	2.79138	0.00524835	0.0300707	2.27998
ENSMUSG00000003660	Snrnp200	5749.25	0.0604709	0.0973218	0.621351	0.534369	0.714592	0.272159
ENSMUSG00000020484	Xbp1	7827.85	0.758996	0.139759	5.43074	5.61e-08	2.84e-06	7.25088
ENSMUSG00000037321	Tap1	4776.61	0.0708233	0.0998146	0.709549	0.477984	0.668016	0.320587
ENSMUSG00000034269	Setd5	4360.35	-0.0533251	0.102137	-0.522096	0.601604	0.763691	0.22069
ENSMUSG00000032009	Sesn3	3857.5	-1.24029	0.198957	-6.23397	4.55e-10	3.85e-08	9.34223
ENSMUSG00000020143	Dock2	7197.86	-0.445521	0.112958	-3.94413	8.01e-05	0.00130989	4.09642
ENSMUSG00000028367	Txn1	5318.78	0.420329	0.147991	2.84022	0.0045082	0.0268513	2.346
ENSMUSG00000023067	Cdkn1a	3504.98	0.462517	0.175146	2.64076	0.00827212	0.0419115	2.08238
ENSMUSG00000027288	Zfp106	5662.5	0.0163072	0.0934923	0.174422	0.861534	0.929072	0.0647278
ENSMUSG00000030745	Il21r	3302.2	0.14366	0.135862	1.0574	0.29033	0.497411	0.537108
ENSMUSG00000048865	Arhgap30	5309.84	-0.0995269	0.094688	-1.0511	0.293211	0.50098	0.53282
ENSMUSG00000032525	Nktr	4481.17	-0.0556836	0.105322	-0.528699	0.597015	0.760848	0.224015
ENSMUSG00000029247	Paics	5112.77	0.112164	0.10181	1.1017	0.270592	0.475756	0.567686
ENSMUSG00000024966	Stip1	5685.51	0.478062	0.138038	3.46327	0.000533646	0.00553984	3.27275
ENSMUSG00000022488	Nckap1l	5338.72	-0.166151	0.0927802	-1.7908	0.0733251	0.19944	1.13475
ENSMUSG00000032578	Cish	6817.93	0.364285	0.111437	3.26898	0.00107936	0.00940438	2.96683
ENSMUSG00000041859	Mcm3	6666.53	0.421548	0.121585	3.4671	0.0005261	0.00547112	3.27893
ENSMUSG00000002028	Kmt2a	6615.34	-0.371951	0.122676	-3.03197	0.00242961	0.0172141	2.61446
ENSMUSG00000024853	Sf3b2	6240.38	0.187858	0.0878255	2.139	0.032436	0.112189	1.48897
ENSMUSG00000032555	Topbp1	6254.99	0.198589	0.111057	1.78818	0.0737474	0.200443	1.13225
ENSMUSG00000029328	Hnrnpdl	4946.66	0.220366	0.0974537	2.26124	0.0237444	0.0895948	1.62444
ENSMUSG00000020571	Pdia6	3957.41	0.558345	0.150707	3.70483	0.00021153	0.00275769	3.67463
ENSMUSG00000019179	Mdh2	4885.81	0.387413	0.124512	3.11145	0.00186169	0.0141415	2.73009
ENSMUSG00000038733	Wdr26	5573.35	-0.153806	0.0916943	-1.67737	0.0934695	0.235361	1.02933
ENSMUSG00000041459	Tardbp	6227.4	0.309767	0.104056	2.97692	0.00291162	0.0196144	2.53587
ENSMUSG00000033732	Sf3b3	5998.36	0.22229	0.107562	2.06663	0.0387691	0.127785	1.41151
ENSMUSG00000018965	Ywhah	6026.53	0.24101	0.116491	2.06893	0.038553	0.127341	1.41394
ENSMUSG00000029202	Pds5a	6066.01	0.060537	0.0870777	0.695207	0.486926	0.67637	0.312537
ENSMUSG00000075284	Wipf1	5529.5	0.0281269	0.0867329	0.324293	0.745716	0.861027	0.127426
ENSMUSG00000032096	Arcn1	4999.69	0.31366	0.0927453	3.38195	0.000719737	0.00688287	3.14283
ENSMUSG00000036323	Srp72	4246.23	-0.0701327	0.0850936	-0.824184	0.409835	0.611283	0.387391
ENSMUSG00000020594	Pum2	5587.59	-0.0506826	0.0961977	-0.526859	0.598291	0.761668	0.223087
ENSMUSG00000026615	Eprs	4718.64	0.449717	0.126284	3.56115	0.00036924	0.00419763	3.43269
ENSMUSG00000041133	Smc1a	4868.26	0.158455	0.090821	1.7447	0.0810379	0.213093	1.09131
ENSMUSG00000074656	Eif2s2	4019.48	0.548584	0.117665	4.66226	3.13e-06	8.97e-05	5.50479
ENSMUSG00000031818	Cox4i1	4665.05	0.164516	0.0992733	1.6572	0.0974785	0.241658	1.01109
ENSMUSG00000024360	Etf1	5466.46	0.406257	0.124717	3.25744	0.00112421	0.00968207	2.94915
ENSMUSG00000053332	Gas5	3798.7	0.29661	0.120848	2.45441	0.0141117	0.0614166	1.85042
ENSMUSG00000000563	Atp5f1	4569.2	0.300599	0.10773	2.79031	0.00526575	0.0301352	2.27854
ENSMUSG00000003072	Atp5d	4119.72	0.268429	0.113086	2.37366	0.0176125	0.0721898	1.75418
ENSMUSG00000055436	Srsf11	5364.64	0.0451378	0.0910311	0.49585	0.62	0.778255	0.207608
ENSMUSG00000075415	Fnbp1	5500.78	0.155092	0.0842867	1.84005	0.0657611	0.184737	1.18203
ENSMUSG00000001228	Uhrf1	6894.57	0.383444	0.121994	3.14313	0.00167151	0.0130119	2.77689
ENSMUSG00000030742	Lat	4886.95	0.0540174	0.100605	0.536926	0.591319	0.756886	0.228178
ENSMUSG00000107176	Gm9794	3754.79	0.0996461	0.111465	0.893969	0.371339	0.577221	0.43023
ENSMUSG00000007815	Rhoa	4898.24	0.0518819	0.0886944	0.584951	0.558581	0.733301	0.252914
ENSMUSG00000022185	Acin1	5586.61	-0.0630546	0.110398	-0.571158	0.567893	0.740628	0.245734
ENSMUSG00000029135	Fosl2	1527.61	-0.105925	0.137831	-0.76851	0.442184	0.638296	0.354397
ENSMUSG00000034120	Srsf2	7498.53	0.317742	0.112901	2.81434	0.00488775	0.0285709	2.31089
ENSMUSG00000054387	Mdm4	5867.57	-0.21024	0.107788	-1.9505	0.0511171	0.155708	1.29143
ENSMUSG00000024335	Brd2	5336.63	0.235884	0.100217	2.35373	0.018586	0.0747957	1.73082
ENSMUSG00000068823	Csde1	4475.57	0.0294089	0.100304	0.293198	0.769371	0.874644	0.113864
ENSMUSG00000032580	Rbm5	3094.04	-0.309088	0.0976811	-3.16425	0.00155481	0.0123381	2.80832
ENSMUSG00000058793	Cds2	5344.89	-0.0947292	0.108264	-0.874986	0.381581	0.586329	0.418413
ENSMUSG00000041954	Tnfrsf18	4066.37	-0.0523738	0.139541	-0.37533	0.707415	0.838115	0.150326
ENSMUSG00000022637	Cblb	2161.35	-1.07496	0.150464	-7.1443	9.05e-13	1.26e-10	12.0436
ENSMUSG00000014867	Surf4	4258.62	0.328773	0.105431	3.11836	0.00181858	0.0138771	2.74027
ENSMUSG00000029713	Gnb2	5821.89	0.214767	0.0975054	2.20262	0.0276216	0.0997996	1.55875
ENSMUSG00000021108	Prkch	4362.35	-0.135731	0.0973612	-1.3941	0.163287	0.341421	0.787047
ENSMUSG00000015647	Lama5	5695.16	0.242316	0.151698	1.59735	0.110187	0.263549	0.957871
ENSMUSG00000056737	Capg	7610.24	0.0381363	0.106979	0.356484	0.721478	0.846539	0.141777
ENSMUSG00000020326	Ccng1	4530.58	0.0926122	0.0882078	1.04993	0.293749	0.501672	0.532023
ENSMUSG00000030678	Maz	5961.16	0.00695143	0.0860375	0.0807953	0.935605	0.968126	0.0289076
ENSMUSG00000045817	Zfp36l2	4552.96	-0.620149	0.159795	-3.88092	0.000104064	0.00160442	3.9827
ENSMUSG00000027642	Rpn2	4885.6	0.372666	0.118984	3.13208	0.00173571	0.0134008	2.76052
ENSMUSG00000015749	Anp32e	7433.01	0.438178	0.119558	3.66499	0.000247347	0.00309276	3.60669
ENSMUSG00000029169	Dhx15	5342.95	0.191194	0.0981388	1.9482	0.0513916	0.156329	1.28911
ENSMUSG00000008475	Arpc5	5483.37	0.0153595	0.091253	0.168318	0.866333	0.931514	0.0623151
ENSMUSG00000039001	Rps21	3772.77	-0.107566	0.118218	-0.909892	0.36288	0.569499	0.440238
ENSMUSG00000045482	Trrap	5554.16	-0.0458048	0.105233	-0.435271	0.663366	0.808384	0.178247
ENSMUSG00000018362	Kpna2	6609.43	0.372898	0.118623	3.14355	0.00166914	0.0130119	2.77751
ENSMUSG00000005125	Ndrg1	2539.11	-1.26025	0.586766	-2.14779	0.0317301	0.11041	1.49853
ENSMUSG00000028034	Fubp1	4786.96	0.174593	0.106623	1.63749	0.101529	0.248834	0.99341
ENSMUSG00000007880	Arid1a	6151.23	0.0668661	0.106349	0.628739	0.52952	0.710508	0.276118
ENSMUSG00000086503	Xist	1164.12	0.870502	0.146973	5.92288	3.16e-09	2.19e-07	8.49982
ENSMUSG00000021134	Srsf5	4972.49	-0.00339379	0.0828637	-0.0409563	0.967331	0.984434	0.014425
ENSMUSG00000031101	Sash3	5012.62	-0.477154	0.142681	-3.34421	0.000825166	0.00767553	3.08346
ENSMUSG00000030104	Edem1	4030.12	-0.00223323	0.0892921	-0.0250104	0.980047	0.989639	0.00875323
ENSMUSG00000019471	Cdc37	5168.29	0.344458	0.107519	3.20368	0.00135683	0.0111136	2.86747
ENSMUSG00000029552	Tes	3766.78	0.0572345	0.0945462	0.605361	0.544939	0.722445	0.263652
ENSMUSG00000039158	Akna	5133.97	-0.48065	0.134441	-3.57519	0.000349979	0.00404274	3.45596
ENSMUSG00000036707	Cab39	5047.95	0.214823	0.0974732	2.20392	0.0275303	0.0995652	1.56019
ENSMUSG00000036438	Calm2	3663.33	0.227377	0.115169	1.9743	0.0483475	0.149671	1.31563
ENSMUSG00000040481	Bptf	4179.06	-0.100528	0.090286	-1.11344	0.265518	0.470068	0.575906
ENSMUSG00000047867	Gimap6	2739.73	-1.21171	0.211023	-5.74206	9.35e-09	5.73e-07	8.02904
ENSMUSG00000022051	Bnip3l	3146.32	-0.511174	0.179795	-2.8431	0.00446776	0.0266526	2.34991
ENSMUSG00000026581	Sell	2160.12	-2.61997	0.603271	-4.34294	1.41e-05	0.000320868	4.85204
ENSMUSG00000028790	Khdrbs1	5104.92	0.0926587	0.0883295	1.04901	0.294172	0.501996	0.531398
ENSMUSG00000027593	Raly	5183.62	0.14875	0.105505	1.40989	0.158573	0.334583	0.799771
ENSMUSG00000018209	Stk4	5101.88	-0.518593	0.116348	-4.45726	8.3e-06	0.000205662	5.08085
ENSMUSG00000049109	Themis	3931.19	0.435198	0.144604	3.00959	0.00261603	0.0181194	2.58236
ENSMUSG00000044147	Arf6	4192.2	0.264327	0.12993	2.03437	0.0419139	0.134626	1.37764
ENSMUSG00000026159	Agfg1	4540.21	0.0135331	0.0949177	0.142577	0.886624	0.941922	0.0522604
ENSMUSG00000022346	Myc	4620.24	-0.122895	0.120799	-1.01735	0.308986	0.517888	0.510061
ENSMUSG00000118642		3266.75	-0.674579	0.124603	-5.4138	6.17e-08	3.09e-06	7.20971
ENSMUSG00000033228	Scaf11	4610.24	0.0100749	0.0856404	0.117642	0.906352	0.95258	0.0427033
ENSMUSG00000025016	Tm9sf3	4746.34	0.135044	0.0984826	1.37125	0.170298	0.350676	0.768792
ENSMUSG00000021670	Hmgcr	4614.82	0.388686	0.114527	3.39385	0.000689173	0.00665449	3.16167
ENSMUSG00000042406	Atf4	3089.72	0.415408	0.125201	3.31794	0.00090685	0.00823877	3.04246
ENSMUSG00000017485	Top2b	4425.9	-0.0921252	0.103747	-0.88798	0.374551	0.580379	0.426489
ENSMUSG00000001424	Snd1	3633.14	0.291901	0.104559	2.79172	0.00524291	0.0300707	2.28043
ENSMUSG00000050708	Ftl1	3787.05	0.289513	0.129429	2.23684	0.0252965	0.0938064	1.59694
ENSMUSG00000020277	Pfkl	4897.71	0.133002	0.101366	1.3121	0.189488	0.37665	0.722419
ENSMUSG00000029068	Ccnl2	4507.35	-0.281177	0.0925071	-3.03952	0.00236959	0.0169725	2.62533
ENSMUSG00000016921	Srsf6	6325.43	0.0637489	0.0865395	0.736645	0.461338	0.653656	0.335981
ENSMUSG00000057322	Rpl38	3364.07	0.106983	0.106733	1.00234	0.31618	0.52457	0.500066
ENSMUSG00000003316	Glg1	4033.79	-0.272927	0.0907912	-3.0061	0.00264624	0.0182761	2.57737
ENSMUSG00000032803	Cdv3	4822.8	0.416143	0.134455	3.09503	0.00196793	0.0147257	2.70599
ENSMUSG00000033047	Eif3l	4673.22	0.309932	0.121296	2.55517	0.0106137	0.0502592	1.97413
ENSMUSG00000081895	Rpl17-ps10	3632.03	-0.861171	0.148858	-5.7852	7.24e-09	4.6e-07	8.14011
ENSMUSG00000037533	Rapgef6	4079.76	-0.328459	0.117054	-2.80604	0.00501552	0.0290754	2.29968
ENSMUSG00000000346	Dazap2	4423.03	-0.0999112	0.0978204	-1.02137	0.307077	0.516009	0.512753
ENSMUSG00000012443	Kif11	5492.56	0.196628	0.0981932	2.00246	0.0452349	0.142628	1.34453
ENSMUSG00000005410	Mcm5	6247.79	0.433292	0.129835	3.33724	0.000846143	0.0078241	3.07256
ENSMUSG00000028692	Akr1a1	4326.71	0.243784	0.108798	2.24071	0.025045	0.0930342	1.60128
ENSMUSG00000040274	Cdk6	2861.79	0.799723	0.126256	6.33416	2.39e-10	2.18e-08	9.62226
ENSMUSG00000021595	Nsun2	4217.03	0.348038	0.134191	2.5936	0.0094977	0.0464946	2.02238
ENSMUSG00000029505	Ep400	5050.19	0.046943	0.0904415	0.519043	0.60373	0.765605	0.219157
ENSMUSG00000055204	Ankrd17	4481.71	-0.0125993	0.0966983	-0.130295	0.896333	0.947537	0.0475307
ENSMUSG00000022462	Slc38a2	3051.97	-0.151383	0.0954205	-1.58648	0.11263	0.267499	0.948346
ENSMUSG00000040010	Slc7a5	3928.09	1.22408	0.156122	7.84052	4.49e-15	9.66e-13	14.3481
ENSMUSG00000066306	Numa1	5278.17	-0.230433	0.101585	-2.26837	0.0233064	0.0884069	1.63253
ENSMUSG00000042548	Asxl1	4522.62	-0.298659	0.112761	-2.6486	0.00808259	0.0411589	2.09245
ENSMUSG00000000628	Hk2	3875.18	0.439745	0.14659	2.99983	0.00270126	0.0185625	2.56843
ENSMUSG00000024392	Bag6	5181.88	0.169124	0.0924831	1.8287	0.0674444	0.187993	1.17105
ENSMUSG00000017548	Suz12	5170.58	0.295118	0.0967672	3.04977	0.00229016	0.0164977	2.64013
ENSMUSG00000028798	Eif3i	3678.82	0.247094	0.116018	2.1298	0.0331882	0.114299	1.47902
ENSMUSG00000031353	Rbbp7	6223.27	0.391416	0.114691	3.41279	0.000643007	0.00631808	3.19178
ENSMUSG00000071646	Mta2	4867.37	0.255934	0.0904079	2.83088	0.00464202	0.0274207	2.33329
ENSMUSG00000011257	Pabpc4	4332.2	0.349225	0.134786	2.59096	0.00957079	0.0467461	2.01905
ENSMUSG00000024677	Ms4a6b	3271.78	-1.52181	0.488694	-3.11403	0.0018455	0.0140469	2.73389
ENSMUSG00000092274	Neat1	4045.87	-0.491556	0.182611	-2.69182	0.0071063	0.037573	2.14836
ENSMUSG00000071068	Treml2	3938.49	0.590474	0.104925	5.62757	1.83e-08	1.05e-06	7.73809
ENSMUSG00000028211	Trp53inp1	3045.95	-1.84959	0.42408	-4.36142	1.29e-05	0.000298865	4.88866
ENSMUSG00000009585	Apobec3	5481.69	-0.143639	0.106224	-1.35223	0.1763	0.358623	0.753747
ENSMUSG00000024399	Ltb	5555.38	-0.381394	0.167199	-2.28107	0.0225441	0.0861189	1.64697
ENSMUSG00000028382	Ptbp3	4434.01	-0.272054	0.100206	-2.71493	0.00662892	0.035756	2.17856
ENSMUSG00000038172	Ttc39b	3737.02	-0.214573	0.10481	-2.04726	0.0406321	0.13165	1.39113
ENSMUSG00000057236	Rbbp4	5330.12	0.198429	0.0919488	2.15803	0.0309252	0.108433	1.50969
ENSMUSG00000022391	Rangap1	5430.83	0.506011	0.125922	4.01845	5.86e-05	0.00101781	4.23223
ENSMUSG00000009470	Tnpo1	4869.44	0.223475	0.112153	1.99258	0.0463071	0.145029	1.33435
ENSMUSG00000031948	Kars	4255.9	0.34628	0.123953	2.79363	0.00521201	0.0299422	2.28299
ENSMUSG00000029104	Htt	4124.28	-0.250992	0.090886	-2.76161	0.00575172	0.0321477	2.2402
ENSMUSG00000024640	Psat1	4267.21	0.890476	0.151067	5.89457	3.76e-09	2.55e-07	8.42521
ENSMUSG00000028931	Kcnab2	4801.47	0.322339	0.0933326	3.45366	0.000553033	0.00565582	3.25725
ENSMUSG00000017421	Zfp207	4717.11	-0.0469662	0.0891115	-0.527049	0.598159	0.761586	0.223183
ENSMUSG00000070493	Chchd2	4408.08	0.233964	0.127498	1.83503	0.0665005	0.186096	1.17717
ENSMUSG00000043131	Mob1a	4834.24	0.0295604	0.0869221	0.340079	0.733797	0.853808	0.134424
ENSMUSG00000041453	Rpl21	3372.43	0.30309	0.366267	0.827512	0.407947	0.609254	0.389397
ENSMUSG00000029777	Gars	4487.74	0.658037	0.128974	5.10207	3.36e-07	1.35e-05	6.47372
ENSMUSG00000041168	Lonp1	3569.96	0.185238	0.132212	1.40107	0.161194	0.338643	0.792651
ENSMUSG00000015120	Ube2i	4676.91	0.115763	0.0918256	1.26068	0.207423	0.400772	0.683142
ENSMUSG00000042520	Ubap2l	5445.41	0.0800634	0.0973189	0.822691	0.410684	0.612064	0.386492
ENSMUSG00000007670	Khsrp	5688.66	0.280585	0.114673	2.44683	0.014412	0.0623456	1.84128
ENSMUSG00000042650	Alkbh5	3813.19	0.127066	0.0986943	1.28747	0.197931	0.38836	0.703486
ENSMUSG00000037652	Phc3	8049.56	-0.00516069	0.109815	-0.0469944	0.962518	0.98241	0.0165913
ENSMUSG00000057193	Slc44a2	4440.32	-0.163951	0.112211	-1.46109	0.143989	0.314265	0.841669
ENSMUSG00000071659	Hnrnpul2	5162.34	0.155904	0.085343	1.8268	0.0677303	0.188546	1.16922
ENSMUSG00000032187	Smarca4	5526.61	0.282719	0.105024	2.69195	0.00710361	0.037573	2.14852
ENSMUSG00000018341	Il12rb2	432.352	-0.0996527	0.22015	-0.452658	0.650795	0.800304	0.186556
ENSMUSG00000001833	2024-09-07	4726.09	0.0284182	0.095866	0.296436	0.766897	0.873488	0.115263
ENSMUSG00000029730	Mcm7	6272.36	0.292998	0.110067	2.66201	0.00776767	0.0399196	2.10971
ENSMUSG00000076490	Trbc1	4958.55	-0.297591	0.11075	-2.68704	0.00720879	0.0379539	2.14214
ENSMUSG00000019132	BC005537	5145.29	-0.340646	0.105425	-3.23117	0.00123283	0.0103053	2.9091
ENSMUSG00000022403	St13	4178.04	0.244739	0.120608	2.02921	0.0424367	0.135861	1.37226
ENSMUSG00000037608	Bclaf1	4387.46	-0.0221187	0.103831	-0.213025	0.831308	0.912059	0.0802382
ENSMUSG00000071650	Ganab	4843.37	0.107942	0.0963596	1.1202	0.262627	0.467313	0.58066
ENSMUSG00000036943	Rab8b	5629.21	0.0926965	0.100075	0.926268	0.354307	0.560966	0.45062
ENSMUSG00000028759	Hp1bp3	5257.15	-0.139286	0.117672	-1.18368	0.23654	0.435841	0.626095
ENSMUSG00000010608	Rbm25	4754.59	0.0838767	0.0887318	0.945283	0.344514	0.552682	0.462793
ENSMUSG00000054435	Gimap4	3481.22	-1.05929	0.193214	-5.48248	4.19e-08	2.2e-06	7.37736
ENSMUSG00000040699	Limd2	5267.8	-0.410193	0.149235	-2.74863	0.00598448	0.0331412	2.22297
ENSMUSG00000025220	Mgea5	4020.75	-0.386131	0.101642	-3.79892	0.000145329	0.00206713	3.83765
ENSMUSG00000027405	Nop56	5764.16	0.515531	0.1653	3.11875	0.00181617	0.0138657	2.74084
ENSMUSG00000028480	Glipr2	3307.25	0.675705	0.0996213	6.78273	1.18e-11	1.36e-09	10.9284
ENSMUSG00000006932	Ctnnb1	5165.07	-0.273703	0.0832596	-3.28734	0.00101137	0.00897189	2.99509
ENSMUSG00000019843	Fyn	3674.11	-0.287865	0.10915	-2.63732	0.0083563	0.0421819	2.07799
ENSMUSG00000026117	Zap70	3875.03	-0.0600724	0.0959853	-0.62585	0.531413	0.712073	0.274568
ENSMUSG00000001794	Capns1	4699.9	0.0750051	0.0966381	0.776145	0.437663	0.634996	0.35886
ENSMUSG00000024338	Psmb8	5432.66	0.435896	0.127655	3.41464	0.000638665	0.00629595	3.19473
ENSMUSG00000062933	Gm10123	3585.88	0.530806	0.685501	0.774333	0.438734	0.635997	0.357799
ENSMUSG00000053398	Phgdh	5265	0.568014	0.132132	4.29883	1.72e-05	0.000376465	4.76523
ENSMUSG00000005442	Cic	4934.24	-0.176534	0.106228	-1.66184	0.0965457	0.240216	1.01527
ENSMUSG00000002603	Tgfb1	4799.73	0.271217	0.114364	2.37151	0.0177155	0.072466	1.75165
ENSMUSG00000038393	Txnip	5527.06	-1.67009	0.429512	-3.88835	0.000100929	0.0015657	3.99598
ENSMUSG00000063358	Mapk1	4984	0.0522614	0.0909511	0.57461	0.565555	0.739621	0.247525
ENSMUSG00000032504	Pdcd6ip	4360.16	0.106934	0.0868963	1.23059	0.218476	0.415255	0.660597
ENSMUSG00000002699	Lcp2	4828.81	0.109324	0.122527	0.892246	0.372261	0.578088	0.429152
ENSMUSG00000076928	Trac	4986.85	-0.293698	0.100262	-2.92932	0.00339705	0.0219049	2.4689
ENSMUSG00000007817	Zmiz1	4631.03	0.00420325	0.0947749	0.0443498	0.964626	0.983362	0.0156412
ENSMUSG00000020315	Sptbn1	6044.17	-0.348699	0.106262	-3.28151	0.00103255	0.00911602	2.98609
ENSMUSG00000039367	Sec24c	4443.71	0.0854295	0.089555	0.953933	0.340117	0.548874	0.468371
ENSMUSG00000034342	Cbl	5269.39	-0.00525416	0.103196	-0.0509145	0.959394	0.980683	0.0180032
ENSMUSG00000007564	Ppp2r1a	4771.18	0.275288	0.101437	2.71389	0.00664975	0.0358116	2.17719
ENSMUSG00000030124	Lag3	934.914	-0.412036	0.192125	-2.14462	0.031983	0.11103	1.49508
ENSMUSG00000038324	Trpc4ap	5262.44	-0.307471	0.120614	-2.54922	0.0107965	0.050837	1.96672
ENSMUSG00000040549	Ckap5	4737.36	0.0869986	0.102257	0.850787	0.394888	0.597658	0.403526
ENSMUSG00000020788	Atp2a3	5093.09	0.139653	0.114407	1.22067	0.222212	0.41907	0.653232
ENSMUSG00000034892	Rps29	3200.68	0.283029	0.137144	2.06374	0.0390422	0.128209	1.40847
ENSMUSG00000028426	Rad23b	4291.66	0.325076	0.111044	2.92745	0.00341754	0.0220181	2.46629
ENSMUSG00000068739	Sars	3289.23	0.405907	0.0991638	4.0933	4.25e-05	0.000785997	4.37133
ENSMUSG00000019850	Tnfaip3	1599.56	-0.574241	0.122143	-4.70136	2.58e-06	7.71e-05	5.58765
ENSMUSG00000022673	Mcm4	5452.16	0.305105	0.118929	2.56543	0.0103048	0.0493077	1.98696
ENSMUSG00000024590	Lmnb1	6093.23	0.230189	0.0864345	2.66317	0.00774088	0.0398091	2.11121
ENSMUSG00000025781	Atp5c1	3772.7	0.182307	0.103797	1.75639	0.0790222	0.209525	1.10225
ENSMUSG00000026558	Uck2	3837.55	0.229128	0.106422	2.15301	0.0313181	0.109377	1.5042
ENSMUSG00000032312	Csk	5072.78	0.217509	0.0922808	2.35704	0.0184213	0.0744315	1.73468
ENSMUSG00000042688	Mapk6	1867.8	0.0919545	0.127173	0.723064	0.46964	0.661387	0.328235
ENSMUSG00000000682	Cd52	4858.33	-0.268117	0.100864	-2.65821	0.00785565	0.0402072	2.10482
ENSMUSG00000028602	Tnfrsf8	1618.15	1.90798	0.219845	8.67875	4e-18	1.55e-15	17.3978
ENSMUSG00000027170	Eif3m	3362.27	0.11571	0.0909585	1.27212	0.203331	0.395356	0.691796
ENSMUSG00000032604	Qars	3630.7	0.0321257	0.105481	0.304562	0.7607	0.870171	0.118787
ENSMUSG00000031987	Egln1	3333.87	-0.0547582	0.14868	-0.368296	0.712652	0.841297	0.147122
ENSMUSG00000004207	Psap	4774.69	-0.238208	0.101762	-2.34083	0.0192407	0.0768322	1.71578
ENSMUSG00000038482	Tfdp1	5670.51	0.505589	0.111307	4.54231	5.56e-06	0.000146267	5.25461
ENSMUSG00000031827	Cotl1	5180.78	0.0739697	0.0824291	0.897374	0.369519	0.575661	0.432363
ENSMUSG00000027333	Smox	1170.48	-0.360538	0.158455	-2.27533	0.0228864	0.0871432	1.64042
ENSMUSG00000017843	Ppp2r5c	4084.83	-0.234209	0.109795	-2.13315	0.0329126	0.113499	1.48264
ENSMUSG00000026923	Notch1	3563.12	0.219624	0.12355	1.7776	0.075469	0.203507	1.12223
ENSMUSG00000030403	Vasp	4150.88	0.189885	0.0966094	1.9655	0.0493569	0.15182	1.30665
ENSMUSG00000021357	Exoc2	2263.62	-0.079464	0.10501	-0.756725	0.449215	0.643757	0.347546
ENSMUSG00000052142	Rasal3	4644.35	0.127579	0.130653	0.976473	0.32883	0.537513	0.483028
ENSMUSG00000021771	Vdac2	4037.54	0.343571	0.115105	2.98484	0.00283724	0.0192739	2.5471
ENSMUSG00000004865	Srpk1	3510.65	-0.131293	0.0880156	-1.4917	0.135778	0.302548	0.86717
ENSMUSG00000024054	Smchd1	3981.69	0.0857497	0.0905581	0.946903	0.343688	0.551921	0.463835
ENSMUSG00000030082	Sec61a1	3554.6	0.257391	0.11715	2.19711	0.0280124	0.100632	1.55265
ENSMUSG00000008690	Ncaph2	4476.16	0.0967223	0.111184	0.869932	0.384338	0.588102	0.415287
ENSMUSG00000001211	Agpat3	3741.82	0.471745	0.10508	4.48937	7.14e-06	0.000179932	5.1461
ENSMUSG00000054342	Kcnn4	4465.56	-0.393367	0.0936134	-4.20204	2.65e-05	0.000541362	4.57755
ENSMUSG00000023830	Igf2r	5514.58	-0.801021	0.0844035	-9.49038	2.3e-21	1.39e-18	20.6379
ENSMUSG00000038608	Dock10	4011.26	0.139562	0.0871469	1.60145	0.109276	0.261974	0.961473
ENSMUSG00000014769	Psmb1	3630.43	0.166595	0.0958302	1.73844	0.0821342	0.214891	1.08548
ENSMUSG00000039157	Fam102a	3751.04	-0.37761	0.184114	-2.05096	0.0402708	0.130817	1.39501
ENSMUSG00000022781	Pak2	4620.38	0.086846	0.0894974	0.970374	0.33186	0.540528	0.479045
ENSMUSG00000032280	Tle3	3368	0.114433	0.0999237	1.1452	0.252126	0.4539	0.598382
ENSMUSG00000052296	Ppp6r1	5026.7	-0.0481357	0.0851344	-0.565408	0.571796	0.743675	0.242759
ENSMUSG00000022108	Itm2b	4633.08	-0.369351	0.124727	-2.96127	0.00306373	0.0203748	2.51375
ENSMUSG00000009575	Cbx5	5434.05	0.315716	0.108854	2.90036	0.00372739	0.0234038	2.42859
ENSMUSG00000026979	Psd4	5086.55	0.0716486	0.0844155	0.848761	0.396014	0.598491	0.402289
ENSMUSG00000018474	Chd3	6200.58	-0.426148	0.163841	-2.60098	0.00929585	0.045693	2.03171
ENSMUSG00000046711	Hmga1	3337.5	0.194894	0.153853	1.26676	0.205243	0.397673	0.687732
ENSMUSG00000028800	Hdac1	5126.51	0.26978	0.101505	2.6578	0.00786523	0.0402425	2.10429
ENSMUSG00000028943	Espn	3339.77	-0.134794	0.20074	-0.671487	0.50191	0.689177	0.299374
ENSMUSG00000031304	Il2rg	4758.55	-0.182799	0.0881949	-2.07267	0.0382031	0.126473	1.4179
ENSMUSG00000057406	Nsd2	4995.66	0.320288	0.102506	3.12459	0.00178051	0.0136484	2.74945
ENSMUSG00000019370	Calm3	4821.27	0.227746	0.111684	2.03919	0.0414307	0.133663	1.38268
ENSMUSG00000061032	Rrp1	4323.83	0.322332	0.111642	2.8872	0.00388689	0.0240282	2.4104
ENSMUSG00000004677	Myo9b	4302.24	0.0666261	0.0929486	0.716806	0.473494	0.664875	0.324686
ENSMUSG00000030062	Rpn1	4003.5	0.493002	0.132733	3.71424	0.000203814	0.00268361	3.69077
ENSMUSG00000068240	Gm11808	3697.39	-0.154939	0.0973113	-1.5922	0.111341	0.26552	0.953345
ENSMUSG00000020577	Tspan13	1562.74	0.0349301	0.11669	0.29934	0.764681	0.872436	0.11652
ENSMUSG00000015733	Capza2	3999.97	0.341512	0.112631	3.03213	0.00242838	0.0172141	2.61468
ENSMUSG00000019428	Fkbp8	4413.6	0.136845	0.0913444	1.49812	0.134101	0.299743	0.872567
ENSMUSG00000054408	Spcs3	3775.78	0.205718	0.10025	2.05206	0.0401642	0.130696	1.39616
ENSMUSG00000021374	Nup153	4458.69	0.0675084	0.0929587	0.726219	0.467704	0.659928	0.330029
ENSMUSG00000021025	Nfkbia	3342.49	-0.125537	0.0869223	-1.44425	0.14867	0.320208	0.827777
ENSMUSG00000062203	Gspt1	4595.73	0.410386	0.135609	3.02624	0.00247615	0.0173994	2.60622
ENSMUSG00000058355	Abce1	4277.47	0.419761	0.14237	2.94838	0.00319442	0.0210212	2.49561
ENSMUSG00000101188	Eif4a-ps4	3777.49	0.348106	0.144894	2.40248	0.0162842	0.0681547	1.78823
ENSMUSG00000037270	4932438A13Rik	3502.53	-0.381468	0.120399	-3.16837	0.00153294	0.0122107	2.81447
ENSMUSG00000032116	Stt3a	3728.16	0.197577	0.101781	1.9412	0.0522344	0.15793	1.28204
ENSMUSG00000021488	Nsd1	4645.48	-0.0322351	0.0951553	-0.338763	0.734788	0.854465	0.133838
ENSMUSG00000000001	Gnai3	3612.72	0.130989	0.0936455	1.39877	0.161881	0.339564	0.790805
ENSMUSG00000022216	Psme1	4024.63	-0.0269892	0.0996954	-0.270717	0.786609	0.885156	0.104241
ENSMUSG00000005161	Prdx2	4130.73	0.0703519	0.113953	0.617375	0.536987	0.717014	0.270036
ENSMUSG00000022710	Usp7	4224.18	0.173301	0.0863809	2.00624	0.0448303	0.141776	1.34843
ENSMUSG00000001918	Slc1a5	4844.89	0.265581	0.121594	2.18415	0.0289511	0.103095	1.53833
ENSMUSG00000029687	Ezh2	4796.69	0.0818877	0.106308	0.770284	0.441131	0.637502	0.355432
ENSMUSG00000028868	Wasf2	4270.31	-0.230604	0.0951401	-2.42384	0.0153574	0.0654025	1.81368
ENSMUSG00000031715	Smarca5	4684.14	0.289019	0.114257	2.52954	0.0114211	0.052918	1.94229
ENSMUSG00000023118	Sympk	4186.43	0.110007	0.0875541	1.25644	0.208956	0.403009	0.679945
ENSMUSG00000024002	Brd4	3956.12	-0.0110202	0.0867158	-0.127084	0.898874	0.948304	0.046301
ENSMUSG00000022175	Lrp10	3926.21	-0.0842132	0.0892359	-0.943715	0.345315	0.553383	0.461784
ENSMUSG00000019820	Utrn	3736.06	-1.16095	0.159891	-7.26086	3.85e-13	5.68e-11	12.4149
ENSMUSG00000026103	Gls	3970.29	0.094052	0.0989713	0.950296	0.341962	0.55032	0.466022
ENSMUSG00000078853	Igtp	3200.7	-0.351693	0.0973365	-3.61317	0.000302474	0.00361598	3.51931
ENSMUSG00000023150	Ivns1abp	4580.67	0.0247512	0.0951173	0.260217	0.794696	0.889664	0.0997989
ENSMUSG00000002147	Stat6	4218.58	-0.11661	0.0875217	-1.33236	0.182743	0.367167	0.73816
ENSMUSG00000056342	Usp34	4202.96	-0.123248	0.0925094	-1.33228	0.182769	0.367171	0.738098
ENSMUSG00000038518	Jarid2	1810.3	-0.270567	0.104479	-2.58969	0.00960627	0.0468737	2.01745
ENSMUSG00000063550	Nup98	2890.36	0.058051	0.125133	0.463914	0.642709	0.794903	0.191986
ENSMUSG00000067288	Rps28	3052	0.0967698	0.118705	0.815212	0.414951	0.616408	0.382003
ENSMUSG00000021939	Ctsb	3677.67	-0.0351718	0.0904839	-0.388708	0.697493	0.831513	0.15646
ENSMUSG00000036986	Pml	3920	0.0111567	0.0905145	0.123259	0.901902	0.949986	0.0448407
ENSMUSG00000022841	Ap2m1	4129.62	0.29624	0.119833	2.47211	0.0134318	0.0590723	1.87187
ENSMUSG00000032050	Rdx	4793.99	0.217942	0.110626	1.97008	0.048829	0.150689	1.31132
ENSMUSG00000000782	Tcf7	4957.86	-1.1795	0.329013	-3.58497	0.000337121	0.00393648	3.47221
ENSMUSG00000024097	Srsf7	4552.74	0.319308	0.109645	2.91221	0.00358885	0.0228096	2.44504
ENSMUSG00000024644	Cndp2	3478.27	0.611575	0.156045	3.91921	8.88e-05	0.00142085	4.0514
ENSMUSG00000004665	Cnn2	3563.84	-0.068079	0.107364	-0.634096	0.526018	0.707448	0.278999
ENSMUSG00000015755	Tab2	4537.91	0.131186	0.0899695	1.45812	0.144808	0.3153	0.839207
ENSMUSG00000029106	Add1	5008.61	-0.357886	0.107283	-3.33591	0.0008502	0.00783961	3.07048
ENSMUSG00000031309	Rps6ka3	2684.96	-0.314025	0.11254	-2.79035	0.00526508	0.0301352	2.2786
ENSMUSG00000031672	Got2	4246.9	0.330309	0.124389	2.65545	0.00792016	0.0404894	2.10127
ENSMUSG00000030275	Etnk1	3955.07	-0.0318652	0.0962091	-0.331208	0.740487	0.858327	0.130482
ENSMUSG00000024811	Tnks2	3965.5	-0.0963513	0.0957105	-1.00669	0.314081	0.522752	0.502958
ENSMUSG00000036529	Sbf1	5029.54	-0.168303	0.116174	-1.44872	0.147416	0.318721	0.831455
ENSMUSG00000040204	Pclaf	5316.77	0.344959	0.106368	3.24307	0.00118249	0.0100011	2.9272
ENSMUSG00000032479	Map4	4543.17	0.257228	0.0972588	2.64478	0.00817438	0.0415421	2.08754
ENSMUSG00000062867	Impdh2	3830.78	0.343364	0.126218	2.7204	0.00652039	0.0353297	2.18573
ENSMUSG00000027678	Ncoa3	4426.39	0.171822	0.0925589	1.85635	0.0634032	0.180061	1.19789
ENSMUSG00000018819	Lsp1	7002.27	-0.514061	0.101905	-5.04453	4.55e-07	1.74e-05	6.34234
ENSMUSG00000038127	Ccdc50	5504.73	-0.0298696	0.0988855	-0.302062	0.762604	0.87116	0.117701
ENSMUSG00000019907	Ppp1r12a	2730.66	-0.265738	0.105288	-2.52391	0.0116057	0.053526	1.93533
ENSMUSG00000029767	Calu	2882.63	0.168286	0.120446	1.39719	0.162355	0.340086	0.789534
ENSMUSG00000021111	Papola	4459.51	0.0701841	0.10056	0.697934	0.485218	0.674745	0.314063
ENSMUSG00000006728	Cdk4	4267.22	0.337303	0.112976	2.98562	0.00283004	0.0192369	2.54821
ENSMUSG00000021427	Ssr1	3448.95	0.273533	0.10208	2.67958	0.00737137	0.0385271	2.13245
ENSMUSG00000033335	Dnm2	4208.27	-0.0692227	0.0979708	-0.706565	0.479837	0.669735	0.318906
ENSMUSG00000014355	Anapc1	4628.26	0.0413207	0.0982696	0.420483	0.674133	0.815657	0.171255
ENSMUSG00000071076	Jund	5998.97	0.187257	0.103963	1.80118	0.0716739	0.195832	1.14464
ENSMUSG00000061136	Prpf40a	3969.25	0.119905	0.107171	1.11882	0.263216	0.467771	0.579687
ENSMUSG00000020869	Lrrc59	3767.5	0.444053	0.173174	2.5642	0.0103413	0.0494513	1.98542
ENSMUSG00000004264	Phb2	4132.29	0.429405	0.143352	2.99545	0.0027404	0.018747	2.56219
ENSMUSG00000024758	Rtn3	4597.07	0.0366318	0.0988551	0.37056	0.710965	0.839907	0.148152
ENSMUSG00000021728	Emb	2181.56	-0.890464	0.159428	-5.58537	2.33e-08	1.3e-06	7.63226
ENSMUSG00000057110	Cntrl	4263	-0.0651846	0.0961168	-0.678181	0.497657	0.685399	0.30307
ENSMUSG00000030002	Dusp11	3766.84	-0.146205	0.0928565	-1.57452	0.115367	0.271696	0.93792
ENSMUSG00000021577	Sdha	4242.76	0.235859	0.0891589	2.64538	0.00815989	0.0414964	2.08832
ENSMUSG00000046721	Rpl14-ps1	3118.15	0.173453	0.142383	1.21821	0.223144	0.419994	0.651415
ENSMUSG00000013629	Cad	5149.23	0.68034	0.167124	4.07087	4.68e-05	0.000851033	4.32941
ENSMUSG00000038759	Nup205	4102.39	0.25109	0.125099	2.00713	0.0447357	0.141557	1.34935
ENSMUSG00000002052	Supt6	4331.07	0.0942627	0.10484	0.899111	0.368593	0.574695	0.433452
ENSMUSG00000047810	Ccdc88b	4291.07	0.0758177	0.0949576	0.798438	0.424616	0.624141	0.372003
ENSMUSG00000029390	Tmed2	3431.08	0.364189	0.111845	3.25619	0.00112918	0.00970273	2.94724
ENSMUSG00000021484	Lman2	3730.75	0.249768	0.105341	2.37105	0.0177378	0.0725183	1.7511
ENSMUSG00000022982	Sod1	3342.93	0.279267	0.0972347	2.87209	0.00407761	0.0248571	2.38959
ENSMUSG00000022661	Cd200	3013.96	0.575738	0.197258	2.9187	0.00351492	0.0224725	2.45408
ENSMUSG00000041638	Gcn1l1	4465.75	0.352084	0.126613	2.78079	0.0054227	0.0308002	2.26578
ENSMUSG00000029840	Mtpn	4175.81	0.172439	0.0976097	1.76662	0.0772917	0.2065	1.11187
ENSMUSG00000030591	Psmd8	2962.42	0.245921	0.114808	2.14202	0.0321921	0.111627	1.49225
ENSMUSG00000021377	Dek	5153.66	0.241514	0.112985	2.13759	0.0325504	0.112456	1.48744
ENSMUSG00000039981	Zc3h12d	2505.92	-1.01801	0.119472	-8.52092	1.58e-17	5.42e-15	16.8005
ENSMUSG00000000486	2024-09-01	4268.84	-0.169523	0.133831	-1.26669	0.205265	0.397673	0.687685
ENSMUSG00000028832	Stmn1	5684.05	-0.0333483	0.110124	-0.302826	0.762022	0.870888	0.118032
ENSMUSG00000021182	Ccdc88c	3327.33	-0.127449	0.104831	-1.21576	0.224076	0.420988	0.649604
ENSMUSG00000021500	Ddx46	4134.45	0.172511	0.0978224	1.76351	0.0778142	0.207271	1.10894
ENSMUSG00000020745	Pafah1b1	3736.32	0.0726591	0.0867416	0.83765	0.402228	0.604886	0.395528
ENSMUSG00000013787	Ehmt2	4319.82	-0.0512119	0.0981705	-0.521663	0.601905	0.763791	0.220472
ENSMUSG00000027580	Helz2	6163.13	-0.0376413	0.108524	-0.346849	0.728705	0.85122	0.137448
ENSMUSG00000055762	Eef1d	4011.19	0.356915	0.123557	2.88866	0.00386887	0.0239723	2.41242
ENSMUSG00000026305	Lrrfip1	4281.36	0.14145	0.096164	1.47093	0.141311	0.310242	0.849824
ENSMUSG00000041164	Zmiz2	5093.78	-0.0704724	0.0989402	-0.712273	0.476296	0.666894	0.322123
ENSMUSG00000056211	R3hdm1	2409.25	-0.155943	0.119014	-1.31029	0.190097	0.377536	0.721025
ENSMUSG00000004056	Akt2	2766.43	0.183624	0.103096	1.7811	0.0748954	0.202613	1.12554
ENSMUSG00000019188	H13	3842.61	-0.136182	0.094073	-1.44762	0.147724	0.319047	0.830549
ENSMUSG00000060739	Nsa2	2674.57	-0.234871	0.0894792	-2.62487	0.00866822	0.0433641	2.06207
ENSMUSG00000041408	Wapl	3715.43	0.0572711	0.0877541	0.652632	0.513994	0.698321	0.289042
ENSMUSG00000027479	Mapre1	4116.81	0.29413	0.101999	2.88366	0.00393079	0.024222	2.40552
ENSMUSG00000040990	Sh3kbp1	3607.36	-0.481274	0.125883	-3.8232	0.000131731	0.00190245	3.88031
ENSMUSG00000105987	AI506816	4141.26	0.178152	0.145275	1.22631	0.220081	0.416696	0.657418
ENSMUSG00000005779	Psmb4	3717.68	0.361102	0.127492	2.83234	0.00462082	0.0273169	2.33528
ENSMUSG00000032423	Syncrip	4597.12	0.314981	0.120148	2.62161	0.00875167	0.0436222	2.05791
ENSMUSG00000003955	Fam162a	2830.91	-0.0553476	0.173717	-0.318609	0.750023	0.863905	0.124925
ENSMUSG00000025862	Stag2	3980.82	-0.113488	0.0936992	-1.2112	0.22582	0.422864	0.646239
ENSMUSG00000022752	Tomm70a	3871.6	0.330879	0.123641	2.67613	0.00744777	0.0387649	2.12797
ENSMUSG00000035545	Leng8	4161.76	-0.278104	0.130441	-2.13202	0.0330048	0.113765	1.48142
ENSMUSG00000028691	Prdx1	4056.27	0.444591	0.124714	3.5649	0.000363993	0.00416312	3.43891
ENSMUSG00000028312	Smc2	4710.15	0.274883	0.110729	2.48249	0.0130468	0.058006	1.8845
ENSMUSG00000024948	Map4k2	4629.71	-0.392311	0.142262	-2.75767	0.00582146	0.0324532	2.23497
ENSMUSG00000031633	Slc25a4	3514.56	0.366371	0.116558	3.14325	0.00167082	0.0130119	2.77707
ENSMUSG00000025162	Csnk1d	3176.72	-0.0780346	0.0932124	-0.83717	0.402497	0.605124	0.395237
ENSMUSG00000016933	Plcg1	3637.11	-0.27545	0.121831	-2.26091	0.0237647	0.0896487	1.62407
ENSMUSG00000024163	Mapk8ip3	3291.53	-0.165882	0.109538	-1.51438	0.12993	0.293952	0.886292
ENSMUSG00000079017	Ifi27l2a	5761.41	0.169978	0.139878	1.21519	0.224293	0.421	0.649185
ENSMUSG00000035150	Eif2s3x	3133.75	0.35831	0.128795	2.78201	0.00540237	0.0307543	2.26742
ENSMUSG00000025223	Ldb1	4481.47	-0.241947	0.108581	-2.22826	0.0258632	0.0952514	1.58732
ENSMUSG00000022858	Tra2b	4342.74	0.225804	0.116507	1.93811	0.0526101	0.158588	1.27893
ENSMUSG00000070000	Fcho1	4303.97	-0.177231	0.100282	-1.76732	0.0771749	0.20639	1.11252
ENSMUSG00000081051	Gm15427	2634.54	-0.346627	0.0903396	-3.83694	0.000124579	0.00182442	3.90456
ENSMUSG00000041697	Cox6a1	3532.01	0.397934	0.149091	2.66907	0.00760622	0.0392775	2.11883
ENSMUSG00000013236	Ptprs	5420.65	-0.404064	0.0928435	-4.35209	1.35e-05	0.000309628	4.87017
ENSMUSG00000029177	Cenpa	4047.98	-0.114985	0.102901	-1.11743	0.263808	0.468491	0.578711
ENSMUSG00000001441	Npepps	3286.31	-0.255727	0.0969472	-2.63779	0.00834473	0.0421519	2.07859
ENSMUSG00000022372	Sla	3687.19	-0.356391	0.116232	-3.0662	0.00216797	0.0158485	2.66395
ENSMUSG00000022205	Sub1	2707.07	0.239575	0.103541	2.31383	0.0206771	0.0806889	1.68451
ENSMUSG00000005506	Celf1	3767.95	0.249145	0.102228	2.43714	0.0148038	0.0635298	1.82963
ENSMUSG00000029465	Arpc3	3052.63	0.152512	0.0967544	1.57628	0.114961	0.270996	0.939448
ENSMUSG00000001467	Cyp51	3499.12	0.550378	0.147944	3.72019	0.000199077	0.00264517	3.70098
ENSMUSG00000001729	Akt1	4602.14	0.370271	0.101066	3.66367	0.000248631	0.00309276	3.60444
ENSMUSG00000057329	Bcl2	3542.76	0.598145	0.166756	3.58695	0.000334566	0.00391272	3.47552
ENSMUSG00000025234	Arih1	3322.32	0.102254	0.09117	1.12157	0.262045	0.466735	0.581625
ENSMUSG00000001281	Itgb7	4710.29	-0.717429	0.195826	-3.6636	0.000248695	0.00309276	3.60433
ENSMUSG00000040054	Baz2a	3993.68	-0.29869	0.130127	-2.29537	0.021712	0.0837081	1.6633
ENSMUSG00000051853	Arf3	4175.99	0.0975621	0.0997282	0.97828	0.327936	0.536632	0.484211
ENSMUSG00000034681	Rnps1	3841.88	0.31304	0.111874	2.79815	0.00513965	0.0296169	2.28907
ENSMUSG00000030224	Strap	3357.88	0.352081	0.129432	2.7202	0.00652433	0.035336	2.18546
ENSMUSG00000105504	Gbp5	847.535	-1.61549	0.190138	-8.49641	1.96e-17	6.55e-15	16.7088
ENSMUSG00000018770	Atp5g3	3948.81	0.408743	0.144764	2.82351	0.00475009	0.0279386	2.3233
ENSMUSG00000030435	U2af2	4743.58	0.439486	0.114506	3.83811	0.000123983	0.00181846	3.90664
ENSMUSG00000028410	Dnaja1	4504.16	0.303729	0.115607	2.62726	0.00860756	0.043161	2.06512
ENSMUSG00000032458	Copb2	3284.27	0.157342	0.114777	1.37085	0.170422	0.350739	0.768473
ENSMUSG00000035152	Ap2b1	3875.54	0.0684988	0.0871775	0.78574	0.43202	0.630007	0.364496
ENSMUSG00000020321	Mdh1	3131.36	0.00537084	0.111544	0.0481501	0.961597	0.981736	0.0170071
ENSMUSG00000023169	Slc38a1	4275.24	0.177533	0.106304	1.67005	0.0949085	0.237628	1.02269
ENSMUSG00000068882	Ssb	3883.81	0.194163	0.107472	1.80663	0.0708196	0.19438	1.14985
ENSMUSG00000020538	Srebf1	3512.2	0.143812	0.111959	1.28451	0.198964	0.389541	0.701226
ENSMUSG00000042351	Grap2	4452.22	0.037242	0.127215	0.292749	0.769714	0.874836	0.113671
ENSMUSG00000038095	Sbno1	3540.21	0.0262771	0.087163	0.301471	0.763056	0.871431	0.117444
ENSMUSG00000032094	Cd3d	3411.34	-0.261719	0.111667	-2.34375	0.0190908	0.0764189	1.71918
ENSMUSG00000030779	Rbbp6	3434.64	-0.099682	0.0895043	-1.11371	0.265403	0.470046	0.576094
ENSMUSG00000025809	Itgb1	5073.68	-0.0441738	0.11873	-0.372052	0.709854	0.83942	0.148831
ENSMUSG00000021585	Cast	3451.46	-0.438898	0.113878	-3.8541	0.000116155	0.00174084	3.93496
ENSMUSG00000073676	Hspe1	3042.92	0.52777	0.166873	3.1627	0.00156314	0.0123614	2.806
ENSMUSG00000027404	Snrpb	4376.38	0.531883	0.140949	3.77359	0.000160916	0.00225058	3.7934
ENSMUSG00000020114	Cand1	3819.18	0.15956	0.115701	1.37907	0.167872	0.347637	0.775022
ENSMUSG00000084106	Gm6136	2727.89	-0.0826534	0.105006	-0.787134	0.431203	0.629382	0.365318
ENSMUSG00000056394	Lig1	5229.47	0.38297	0.107218	3.57187	0.00035444	0.00407863	3.45046
ENSMUSG00000060261	Gtf2i	3585.77	-0.245857	0.108083	-2.27472	0.022923	0.0872603	1.63973
ENSMUSG00000022831	Hcls1	4917.67	0.265471	0.0834468	3.18133	0.00146603	0.0117901	2.83386
ENSMUSG00000024805	Pcgf5	2674.87	-0.240848	0.142126	-1.69461	0.0901492	0.229961	1.04504
ENSMUSG00000031278	Acsl4	4584.34	0.381678	0.120984	3.15479	0.00160614	0.0126402	2.79422
ENSMUSG00000074886	Grk6	4045.18	0.0653217	0.112914	0.578506	0.562922	0.737246	0.249552
ENSMUSG00000027808	Serp1	2338.31	0.225349	0.109453	2.05887	0.0395064	0.129267	1.40333
ENSMUSG00000024556	Me2	3664.93	-0.0716723	0.144238	-0.496902	0.619258	0.777842	0.208128
ENSMUSG00000037364	Srrt	4492.76	0.14332	0.0843924	1.69826	0.0894586	0.228508	1.04838
ENSMUSG00000027368	Dusp2	2468.42	-0.295373	0.120197	-2.45741	0.0139941	0.0610111	1.85405
ENSMUSG00000002107	Celf2	5796.83	0.0047991	0.091534	0.0524297	0.958186	0.979781	0.01855
ENSMUSG00000030096	Slc6a6	4221.4	0.0131116	0.102076	0.128449	0.897793	0.948083	0.0468236
ENSMUSG00000022280	Rnf19a	1695.81	-0.268477	0.130403	-2.05882	0.0395119	0.129267	1.40327
ENSMUSG00000095567	Noc2l	4394.22	0.475325	0.140109	3.39252	0.000692516	0.00667409	3.15957
ENSMUSG00000027469	Tpx2	4159.06	0.300838	0.109813	2.73955	0.00615236	0.0338717	2.21096
ENSMUSG00000020108	Ddit4	3698.53	-0.106407	0.157228	-0.676767	0.498554	0.685868	0.302288
ENSMUSG00000028760	Eif4g3	4263.18	0.0695564	0.100462	0.692364	0.488709	0.67791	0.31095
ENSMUSG00000024456	Diaph1	4769.7	0.137404	0.0844976	1.62612	0.103923	0.252932	0.983287
ENSMUSG00000004266	Ptpn6	3110.4	0.0342591	0.108775	0.314953	0.752797	0.865734	0.123322
ENSMUSG00000000826	Dnajc5	3026.57	-0.0171258	0.0887493	-0.192968	0.846984	0.92143	0.0721249
ENSMUSG00000026721	Rabgap1l	3550.89	0.259208	0.0909467	2.85011	0.00437037	0.0261961	2.35948
ENSMUSG00000026222	Sp100	4775.37	-0.52828	0.152849	-3.45622	0.000547813	0.00562489	3.26137
ENSMUSG00000022885	St6gal1	5360.86	-0.080231	0.155241	-0.516817	0.605284	0.766863	0.218041
ENSMUSG00000052997	Uba2	4001.25	0.346738	0.10099	3.43338	0.000596103	0.00598207	3.22468
ENSMUSG00000018909	Arrb1	3141.93	-0.888243	0.358036	-2.48088	0.0131059	0.0581946	1.88253
ENSMUSG00000031146	Plp2	4006.43	-0.243982	0.0873521	-2.79309	0.00522068	0.0299767	2.28227
ENSMUSG00000053510	Nrd1	3448.97	0.00940807	0.0873701	0.107681	0.914249	0.956515	0.0389355
ENSMUSG00000059119	Nap1l4	3214.35	0.140478	0.0993932	1.41336	0.15755	0.332983	0.802583
ENSMUSG00000037373	Ctbp1	4017.49	0.183558	0.0902201	2.03456	0.0418954	0.134614	1.37783
ENSMUSG00000006731	B4galnt1	3446.05	-0.324381	0.11145	-2.91054	0.003608	0.0228846	2.44273
ENSMUSG00000022533	Atp13a3	4299.01	0.333805	0.106156	3.14447	0.00166387	0.0129792	2.77888
ENSMUSG00000023977	Ubr2	3562.47	-0.226846	0.108446	-2.09178	0.0364584	0.122365	1.4382
ENSMUSG00000038462	Uqcrfs1	2965.6	0.327963	0.135447	2.42133	0.0154637	0.0656511	1.81069
ENSMUSG00000000131	Xpo6	4550.64	-0.0351861	0.106346	-0.330866	0.740745	0.858373	0.130331
ENSMUSG00000040687	Madd	2703.42	-0.460883	0.181356	-2.54132	0.0110434	0.0516359	1.9569
ENSMUSG00000037926	Ssh2	2437.26	-0.119477	0.121602	-0.982523	0.325842	0.534299	0.486992
ENSMUSG00000018326	Ywhab	4335.23	0.319092	0.10157	3.1416	0.00168029	0.0130459	2.77461
ENSMUSG00000035673	Sbno2	1606.73	-0.141196	0.108359	-1.30304	0.192562	0.381052	0.715429
ENSMUSG00000029405	G3bp2	3770.46	0.369337	0.0969788	3.80843	0.000139853	0.00199678	3.85433
ENSMUSG00000051391	Ywhag	3906.63	0.511612	0.142479	3.59078	0.000329687	0.00387068	3.4819
ENSMUSG00000028413	B4galt1	5383.64	-0.294442	0.127827	-2.30345	0.0212537	0.0824153	1.67256
ENSMUSG00000015671	Psma2	3360.41	0.391571	0.119318	3.28173	0.00103172	0.0091148	2.98644
ENSMUSG00000048251	Rit1	3531.07	-0.179358	0.134566	-1.33287	0.182576	0.367028	0.738556
ENSMUSG00000053113	Socs3	1111.62	-0.624645	0.176776	-3.53354	0.000410032	0.00452146	3.38718
ENSMUSG00000004880	Lbr	4134.98	0.156576	0.120325	1.30128	0.193164	0.381942	0.714073
ENSMUSG00000040675	Mthfd1l	3190.51	0.214515	0.104341	2.0559	0.0397918	0.129877	1.40021
ENSMUSG00000000078	Klf6	2609.95	0.0251376	0.118282	0.212522	0.8317	0.912248	0.0800333
ENSMUSG00000031902	Nfatc3	3528.33	-0.350436	0.110509	-3.17112	0.00151855	0.0121316	2.81857
ENSMUSG00000022141	Nipbl	3526.34	-0.446266	0.121816	-3.66344	0.00024885	0.00309276	3.60406
ENSMUSG00000069094	Pde7a	5020.48	0.0603292	0.0896539	0.672912	0.501003	0.688395	0.30016
ENSMUSG00000037280	Galnt6	3306.3	-0.431706	0.109345	-3.94811	7.88e-05	0.0012911	4.10364
ENSMUSG00000002870	Mcm2	4543.38	0.445508	0.134228	3.31903	0.00090331	0.00821653	3.04416
ENSMUSG00000022018	Rgcc	1143	0.0948083	0.118798	0.798065	0.424833	0.624153	0.371782
ENSMUSG00000026944	Abca2	4165.67	0.0198155	0.112475	0.176177	0.860155	0.928234	0.0654234
ENSMUSG00000020091	Eif4ebp2	4642.96	-0.0322356	0.104727	-0.307804	0.758231	0.869086	0.120198
ENSMUSG00000030754	Copb1	2863.19	0.0300636	0.0881244	0.34115	0.732991	0.853381	0.134901
ENSMUSG00000078566	Bnip3	2905.45	-0.166753	0.199339	-0.836529	0.402857	0.60531	0.394849
ENSMUSG00000060860	Ube2s	3755.57	0.441628	0.133296	3.31314	0.000922557	0.00835125	3.03501
ENSMUSG00000024587	Nars	3190.07	0.707324	0.128279	5.51396	3.51e-08	1.87e-06	7.45488
ENSMUSG00000021116	Eif2s1	3343.12	0.41071	0.138535	2.96466	0.00303019	0.0202142	2.51853
ENSMUSG00000008730	Hipk1	2576.89	-0.11935	0.108188	-1.10317	0.269951	0.475005	0.568714
ENSMUSG00000027193	Api5	3826.27	0.245676	0.102763	2.39071	0.0168159	0.0698132	1.77428
ENSMUSG00000027715	Ccna2	4353.2	0.349006	0.0977506	3.57037	0.000356477	0.00409581	3.44797
ENSMUSG00000002602	Axl	4513.46	-0.642337	0.10947	-5.8677	4.42e-09	2.93e-07	8.3547
ENSMUSG00000028149	Rap1gds1	2789.44	0.272013	0.0943735	2.8823	0.00394778	0.0242516	2.40365
ENSMUSG00000055024	Ep300	3295.38	-0.270905	0.105873	-2.55878	0.0105041	0.0499284	1.97864
ENSMUSG00000031010	Usp9x	3512.94	-0.0724541	0.0942647	-0.768624	0.442116	0.638259	0.354463
ENSMUSG00000017221	Psmd3	3632.34	0.453202	0.129109	3.51024	0.000447702	0.00484464	3.34901
ENSMUSG00000027881	Prpf38b	3601.82	-0.0911744	0.0939519	-0.970436	0.331829	0.540528	0.479086
ENSMUSG00000021264	Yy1	3229.62	0.0391032	0.0918833	0.425575	0.670418	0.813411	0.173654
ENSMUSG00000020649	Rrm2	5312.93	0.538349	0.11588	4.64576	3.39e-06	9.59e-05	5.47001
ENSMUSG00000020929	Eftud2	4193.64	0.356821	0.125026	2.85398	0.00431758	0.0259624	2.36476
ENSMUSG00000041740	Rnf10	3567.26	0.0831749	0.0930835	0.893552	0.371562	0.57747	0.429969
ENSMUSG00000031701	Dnaja2	3253.67	0.211716	0.0970791	2.18087	0.0291933	0.103883	1.53472
ENSMUSG00000038664	Herc1	3817.58	0.0292117	0.100323	0.291176	0.770917	0.875476	0.112993
ENSMUSG00000079487	Med12	3678.18	-0.202905	0.115118	-1.76259	0.0779694	0.207611	1.10808
ENSMUSG00000032328	Tmem30a	3013.78	-0.0302049	0.102395	-0.294984	0.768006	0.874082	0.114635
ENSMUSG00000024613	Tcof1	4268.12	0.519366	0.110307	4.70839	2.5e-06	7.55e-05	5.60261
ENSMUSG00000031506	Ptpn7	5162.65	0.0716587	0.0924545	0.77507	0.438299	0.635611	0.35823
ENSMUSG00000050912	Tmem123	3447.48	-0.463647	0.107816	-4.30034	1.71e-05	0.000374458	4.76818
ENSMUSG00000024527	Afg3l2	2550.69	0.0841692	0.114488	0.735182	0.462229	0.654129	0.335143
ENSMUSG00000030357	Fkbp4	3668.11	0.562986	0.160088	3.51673	0.000436906	0.00474828	3.35961
ENSMUSG00000034135	Sik3	2018.66	-0.189398	0.110154	-1.71939	0.0855439	0.221476	1.06781
ENSMUSG00000031960	Aars	3166.41	0.742074	0.14622	5.07505	3.87e-07	1.51e-05	6.41185
ENSMUSG00000032412	Atp1b3	4386.02	-0.204613	0.0984132	-2.07912	0.0376066	0.124938	1.42474
ENSMUSG00000037242	Clic4	2950.8	0.759091	0.13438	5.64884	1.62e-08	9.5e-07	7.79174
ENSMUSG00000037503	Fam168b	4119.52	-0.230119	0.0929515	-2.47569	0.0132978	0.058702	1.87622
ENSMUSG00000027566	Psma7	2880.03	0.292344	0.131281	2.22686	0.0259567	0.0954556	1.58575
ENSMUSG00000031422	Morf4l2	2913.85	0.149868	0.138776	1.07993	0.280176	0.486552	0.55257
ENSMUSG00000078652	Psme3	4192.45	0.388349	0.131713	2.94845	0.00319369	0.0210212	2.49571
ENSMUSG00000032115	Hyou1	2907.23	0.574301	0.147727	3.88758	0.000101249	0.00156837	3.99461
ENSMUSG00000001783	Rtcb	2803	0.229446	0.12037	1.90616	0.056629	0.166797	1.24696
ENSMUSG00000028634	Hivep3	4247.51	-0.275336	0.15608	-1.76407	0.0777208	0.207168	1.10946
ENSMUSG00000027544	Nfatc2	3250.36	0.272947	0.0926511	2.94597	0.00321945	0.0211489	2.49222
ENSMUSG00000038762	Abcf1	4051.05	0.293537	0.131349	2.23479	0.0254313	0.0942135	1.59463
ENSMUSG00000022974	Paxbp1	2958.78	0.144963	0.0998868	1.45127	0.146704	0.317832	0.833559
ENSMUSG00000031628	Casp3	3157.61	-0.131968	0.134468	-0.981411	0.32639	0.534954	0.486263
ENSMUSG00000014956	Ppp1cb	3892.1	-0.0431613	0.110206	-0.391642	0.695323	0.830187	0.157814
ENSMUSG00000007458	M6pr	3461.15	0.148452	0.0995338	1.49147	0.135838	0.302548	0.866978
ENSMUSG00000005846	Rsl1d1	3380.71	0.384364	0.141588	2.71466	0.0066343	0.0357668	2.1782
ENSMUSG00000000627	Sema4f	573.109	-0.031685	0.168102	-0.188486	0.850495	0.92325	0.070328
ENSMUSG00000024816	Frmd8	3226.93	-0.416922	0.137493	-3.03232	0.00242684	0.0172141	2.61496
ENSMUSG00000026094	Stk17b	2489.9	-0.41073	0.145598	-2.82098	0.00478769	0.0281158	2.31987
ENSMUSG00000026434	Nucks1	4186.6	0.0588407	0.11272	0.522005	0.601667	0.763707	0.220644
ENSMUSG00000000568	Hnrnpd	4163.64	0.473329	0.0968094	4.88929	1.01e-06	3.46e-05	5.99481
ENSMUSG00000109324	Prmt1	3477.47	0.507253	0.156358	3.24417	0.00117793	0.00998491	2.92888
ENSMUSG00000047676	Rpsa-ps10	2513.29	0.0929293	0.0919152	1.01103	0.312	0.521027	0.505845
ENSMUSG00000006169	Clint1	3676.43	-0.0299536	0.108314	-0.276543	0.782131	0.882524	0.10672
ENSMUSG00000026003	Acadl	1642.2	0.067774	0.105659	0.64144	0.521237	0.703749	0.282965
ENSMUSG00000020400	Tnip1	3219.32	-0.444518	0.0882054	-5.03958	4.67e-07	1.78e-05	6.33109
ENSMUSG00000026083	Eif5b	3277	0.266618	0.115279	2.3128	0.0207337	0.0808261	1.68332
ENSMUSG00000037876	Jmjd1c	3999.74	-0.239397	0.0963007	-2.48593	0.0129214	0.0575956	1.88869
ENSMUSG00000000751	Rpa1	4575.39	0.316126	0.0938341	3.36898	0.00075446	0.0071295	3.12236
ENSMUSG00000028676	Srsf10	4045.87	0.200583	0.0971493	2.06469	0.0389527	0.128082	1.40946
ENSMUSG00000063273	Naa15	3906.26	0.316427	0.123475	2.56269	0.0103866	0.0496045	1.98353
ENSMUSG00000025332	Kdm5c	3225.52	-0.0284835	0.105628	-0.26966	0.787422	0.885309	0.103792
ENSMUSG00000035885	Cox8a	2676.55	0.363903	0.144208	2.52346	0.0116205	0.053548	1.93478
ENSMUSG00000041313	Slc7a1	3423.53	0.366702	0.126234	2.90494	0.00367322	0.0231699	2.43495
ENSMUSG00000032437	Stt3b	3908.39	0.00535985	0.0913176	0.0586946	0.953195	0.977332	0.0208181
ENSMUSG00000000791	Il12rb1	3106.11	0.567704	0.16045	3.5382	0.000402858	0.00446524	3.39485
ENSMUSG00000030199	Etv6	1342.75	0.291199	0.155642	1.87096	0.0613507	0.176259	1.21218
ENSMUSG00000030884	Uqcrc2	2708.2	0.164201	0.104526	1.57091	0.116204	0.273197	0.93478
ENSMUSG00000024248	Cox7a2l	2346.07	-0.317609	0.119975	-2.6473	0.00811382	0.04129	2.09077
ENSMUSG00000045763	Basp1	2518.33	-0.13908	0.170973	-0.81346	0.415954	0.617133	0.380954
ENSMUSG00000097415	AU020206	2468.53	0.0311341	0.0906544	0.343437	0.73127	0.852431	0.135922
ENSMUSG00000043091	Tuba1c	4556.46	0.267385	0.131361	2.03551	0.0418	0.134476	1.37882
ENSMUSG00000021413	Prpf4b	3532.3	-0.0860872	0.0883244	-0.974671	0.329724	0.538505	0.48185
ENSMUSG00000027893	Ahcyl1	2749.61	-0.0146297	0.0873523	-0.167479	0.866993	0.931824	0.0619845
ENSMUSG00000019916	P4ha1	2349.84	-0.466852	0.157222	-2.96939	0.00298395	0.020021	2.52521
ENSMUSG00000061589	Dot1l	3660.81	0.226697	0.128454	1.76481	0.0775963	0.206983	1.11016
ENSMUSG00000001910	Nacc1	3800.62	0.356916	0.0995041	3.58695	0.000334567	0.00391272	3.47552
ENSMUSG00000093904	Tomm20	2639.28	0.277984	0.119586	2.32456	0.0200957	0.0791693	1.6969
ENSMUSG00000026356	Dars	2471.66	0.225642	0.118797	1.8994	0.0575124	0.168619	1.24024
ENSMUSG00000050812	AI314180	3282.76	0.127003	0.0999367	1.27084	0.203786	0.395877	0.690825
ENSMUSG00000024378	Stard4	3523.09	0.36232	0.134666	2.69051	0.00713423	0.0376666	2.14665
ENSMUSG00000075010	AW112010	1454.84	-0.439473	0.101208	-4.34228	1.41e-05	0.000321338	4.85075
ENSMUSG00000032777	Gtf3c1	3688.96	0.0402967	0.103686	0.38864	0.697543	0.831513	0.156429
ENSMUSG00000022272	Myo10	953.8	0.365728	0.167283	2.18629	0.0287946	0.102707	1.54069
ENSMUSG00000049354	Dcaf7	3684.81	0.27643	0.0957836	2.88598	0.00390193	0.0240781	2.40872
ENSMUSG00000070691	Runx3	1382.79	0.107515	0.13349	0.805414	0.420581	0.620673	0.376151
ENSMUSG00000025403	Shmt2	3530.89	0.739332	0.136033	5.43494	5.48e-08	2.79e-06	7.2611
ENSMUSG00000020766	Galk1	2325.31	0.21509	0.140543	1.53043	0.125911	0.28857	0.899937
ENSMUSG00000072620	Slfn2	3763.7	0.0339496	0.123521	0.274849	0.783432	0.883231	0.105998
ENSMUSG00000031924	Cyb5b	3477.1	0.432005	0.132712	3.25521	0.00113309	0.00973079	2.94573
ENSMUSG00000037851	Iars	3133.59	0.678212	0.114174	5.94013	2.85e-09	2.01e-07	8.54548
ENSMUSG00000120992		5441.83	-0.195091	0.0961735	-2.02853	0.0425063	0.135997	1.37155
ENSMUSG00000034163	Zfc3h1	3477.58	-0.332178	0.101729	-3.26531	0.00109345	0.0094809	2.9612
ENSMUSG00000001403	Ube2c	3777.14	0.284784	0.122618	2.32254	0.020204	0.0794603	1.69456
ENSMUSG00000003435	Supt5	3478.58	0.0553332	0.0918988	0.60211	0.547101	0.72397	0.261933
ENSMUSG00000036112	Metap2	3871.99	0.358189	0.115913	3.09014	0.00200059	0.0148962	2.69884
ENSMUSG00000006494	Pdk1	3648.54	-0.884021	0.360233	-2.45403	0.0141267	0.0614469	1.84996
ENSMUSG00000003348	Mob3a	4146.46	-0.0850787	0.0904401	-0.940719	0.346849	0.554627	0.45986
ENSMUSG00000056429	Tgoln1	2577.5	-0.00507494	0.0964938	-0.0525935	0.958056	0.979715	0.0186092
ENSMUSG00000056116	H2-T22	2114.99	0.092353	0.0998841	0.924601	0.355173	0.561559	0.44956
ENSMUSG00000003644	Rps6ka1	3498.49	-0.0611686	0.0864126	-0.707868	0.479028	0.668978	0.31964
ENSMUSG00000033004	Mycbp2	3853.24	-0.338773	0.111881	-3.02797	0.00246201	0.0173457	2.60871
ENSMUSG00000039844	Rapgef1	3464.9	0.121898	0.119254	1.02218	0.306698	0.515605	0.51329
ENSMUSG00000046562	Unc119b	2641.51	0.00489308	0.101026	0.0484339	0.96137	0.981644	0.0171092
ENSMUSG00000024349	Tmem173	3125.44	0.0473838	0.0957902	0.494662	0.620839	0.779113	0.207021
ENSMUSG00000039621	Prex1	2406.44	-0.136083	0.118635	-1.14707	0.251353	0.45309	0.599716
ENSMUSG00000027164	Traf6	3221.33	0.147818	0.10473	1.41142	0.15812	0.33386	0.801014
ENSMUSG00000027206	Cops2	2609.95	-0.026522	0.105849	-0.250565	0.802151	0.893962	0.0957441
ENSMUSG00000037553	Zdhhc18	3258.27	-0.137462	0.104023	-1.32146	0.18635	0.372374	0.729672
ENSMUSG00000078671	Chd2	2438.94	-0.311074	0.135543	-2.29503	0.0217316	0.0837622	1.66291
ENSMUSG00000030122	Ptms	3273.93	-0.387766	0.100663	-3.85213	0.000117095	0.00175155	3.93146
ENSMUSG00000037470	Uggt1	3105.23	0.166702	0.103249	1.61455	0.106407	0.256984	0.973029
ENSMUSG00000093930	Hmgcs1	3307.5	0.550548	0.146086	3.76865	0.00016413	0.00228493	3.78481
ENSMUSG00000021248	Tmed10	3306.64	0.347245	0.104286	3.32976	0.000869223	0.0079663	3.06087
ENSMUSG00000005312	Ubqln1	3257.68	0.213428	0.116924	1.82535	0.0679479	0.189012	1.16782
ENSMUSG00000031154	Otud5	3186.57	-0.26536	0.0938512	-2.82745	0.00469203	0.0276572	2.32864
ENSMUSG00000006740	Kif5b	3476.57	0.138607	0.104012	1.33261	0.182661	0.367062	0.738355
ENSMUSG00000026020	Nop58	3589.68	0.385956	0.137957	2.79766	0.0051474	0.0296502	2.28841
ENSMUSG00000053565	Eif3k	2732.08	-0.0268387	0.0945044	-0.283994	0.776415	0.879334	0.109906
ENSMUSG00000002033	Cd3g	3654.43	-0.332702	0.134253	-2.47816	0.013206	0.058455	1.87923
ENSMUSG00000021709	Erbin	3057.02	-0.33197	0.11567	-2.86997	0.00410512	0.024984	2.38667
ENSMUSG00000034595	Ppp1r18	3271.15	-0.0113849	0.103585	-0.109909	0.912481	0.955424	0.039776
ENSMUSG00000053754	Chd8	3584.75	0.00224036	0.0933214	0.0240069	0.980847	0.990052	0.00839868
ENSMUSG00000059923	Grb2	2595.24	0.120173	0.0898139	1.33802	0.18089	0.364418	0.742585
ENSMUSG00000035227	Spcs2	3440.77	0.230784	0.109682	2.10412	0.0353679	0.119584	1.45139
ENSMUSG00000079227	Ccr5	37.6695	-0.447999	0.367142	-1.22023	0.222376	0.419178	0.652912
ENSMUSG00000025935	Tram1	2883.21	-0.0830927	0.0973481	-0.853563	0.393347	0.596108	0.405224
ENSMUSG00000026031	Cflar	1630.57	-0.0142108	0.125375	-0.113347	0.909755	0.954153	0.0410753
ENSMUSG00000058013	2024-09-11	3075.27	0.494724	0.138108	3.58216	0.000340766	0.00396062	3.46754
ENSMUSG00000006676	Usp19	3658.93	-0.287087	0.100606	-2.85359	0.00432287	0.0259838	2.36423
ENSMUSG00000037965	Zc3h7a	3041.48	-0.174565	0.106911	-1.63282	0.102508	0.250658	0.989243
ENSMUSG00000052707	Tnrc6a	3559.44	-0.0909871	0.101097	-0.899995	0.368123	0.574406	0.434007
ENSMUSG00000026775	Yme1l1	2981	0.0594291	0.1	0.594288	0.552319	0.727873	0.25781
ENSMUSG00000006307	Kmt2b	3468.19	-0.0788837	0.111894	-0.704986	0.480819	0.670456	0.318018
ENSMUSG00000037058	Paip2	2084.35	-0.511877	0.114124	-4.48527	7.28e-06	0.000182513	5.13774
ENSMUSG00000021144	Mta1	2881.22	0.0537318	0.09258	0.580382	0.561657	0.735993	0.250529
ENSMUSG00000025494	Sigirr	2202.94	-0.458678	0.0908038	-5.0513	4.39e-07	1.69e-05	6.35773
ENSMUSG00000020863	Luc7l3	3241.33	-0.0819738	0.0947898	-0.864795	0.387151	0.590967	0.412119
ENSMUSG00000056917	Sipa1	3769.37	0.0137799	0.0954766	0.144327	0.885242	0.94151	0.052938
ENSMUSG00000029657	Hsph1	3306.47	0.381299	0.164329	2.32033	0.0203228	0.0798024	1.69202
ENSMUSG00000068798	Rap1a	3141.86	0.334577	0.114059	2.93337	0.00335308	0.021733	2.47456
ENSMUSG00000021990	Spata13	2449.78	-0.955016	0.147834	-6.46005	1.05e-10	1.03e-08	9.98018
ENSMUSG00000028071	Sh2d2a	2844.05	-0.150048	0.130633	-1.14862	0.250714	0.452547	0.600821
ENSMUSG00000008200	Fnbp4	3000.22	-0.147485	0.100576	-1.4664	0.142539	0.312022	0.846067
ENSMUSG00000031530	Dusp4	4298.22	-0.216598	0.166182	-1.30338	0.192446	0.380972	0.715691
ENSMUSG00000025791	Pgm2	2086.75	0.15865	0.164851	0.962388	0.335855	0.544386	0.473849
ENSMUSG00000028964	Park7	2314.24	0.292987	0.133938	2.18748	0.0287077	0.102495	1.542
ENSMUSG00000026192	Atic	3754.16	0.524043	0.122822	4.26668	1.98e-05	0.000423316	4.70244
ENSMUSG00000066979	Bub3	3109.37	0.327745	0.103509	3.16634	0.00154371	0.0122706	2.81144
ENSMUSG00000062270	Morf4l1	2835.94	-0.128244	0.110066	-1.16516	0.243954	0.444381	0.612692
ENSMUSG00000050379	2024-09-06	3528.5	-0.254635	0.132251	-1.92539	0.0541802	0.161808	1.26616
ENSMUSG00000001270	Ckb	2732.85	-0.302457	0.120142	-2.51749	0.0118195	0.0540651	1.9274
ENSMUSG00000003746	Man1a	1264.71	-0.481218	0.117731	-4.08743	4.36e-05	0.000803135	4.36033
ENSMUSG00000026867	Gapvd1	3332.85	-0.0547797	0.0964902	-0.567723	0.570223	0.742246	0.243955
ENSMUSG00000025630	Hprt	2835.3	0.284571	0.108474	2.62341	0.0087054	0.0434565	2.06021
ENSMUSG00000027466	Rbck1	3513.43	0.000268984	0.0983537	0.00273487	0.997818	0.998481	0.000948712
ENSMUSG00000026496	Parp1	3795.05	0.0454457	0.10437	0.435427	0.663253	0.808364	0.178321
ENSMUSG00000024759	Atl3	4147.34	-0.246703	0.0945263	-2.60989	0.00905714	0.0447304	2.04301
ENSMUSG00000003882	Il7r	3543.37	-1.08067	0.1778	-6.078	1.22e-09	9.4e-08	8.91475
ENSMUSG00000056692	D17Wsu92e	3019.55	0.196443	0.103376	1.90027	0.0573979	0.168473	1.2411
ENSMUSG00000026977	2024-03-07	1904.94	-0.28791	0.112902	-2.5501	0.0107693	0.0507568	1.96781
ENSMUSG00000004319	Clcn3	2521.82	0.040972	0.104523	0.391991	0.695065	0.830169	0.157974
ENSMUSG00000026667	Uhmk1	3356.97	0.163257	0.0933259	1.74933	0.0802346	0.211945	1.09564
ENSMUSG00000010095	Slc3a2	2267.23	0.791789	0.124665	6.35134	2.13e-10	1.97e-08	9.67072
ENSMUSG00000027878	Notch2	4939.97	0.0856928	0.114003	0.751671	0.452249	0.645892	0.344622
ENSMUSG00000055531	Cpsf6	3401.67	0.15921	0.0914959	1.74008	0.0818452	0.214555	1.08701
ENSMUSG00000029004	Kmt2e	3012.3	-0.484257	0.122392	-3.9566	7.6e-05	0.00125566	4.11904
ENSMUSG00000029147	Ppm1g	3661.77	0.50319	0.132676	3.79262	0.000149064	0.00210831	3.82663
ENSMUSG00000028059	Arhgef2	3301.42	0.0874816	0.106359	0.82251	0.410787	0.612096	0.386384
ENSMUSG00000020737	Hn1	3988.44	0.143759	0.0901057	1.59545	0.110612	0.264383	0.956199
ENSMUSG00000083596	Rpl21-ps15	2353.45	0.163163	0.114193	1.42883	0.153054	0.32632	0.815155
ENSMUSG00000048271	Rbm33	3044.43	-0.421622	0.145166	-2.90441	0.00367942	0.0231799	2.43422
ENSMUSG00000038766	Gabpb2	3344.66	-0.0833716	0.107816	-0.773275	0.43936	0.636222	0.35718
ENSMUSG00000028478	Clta	2909.99	0.219858	0.0963116	2.28278	0.0224435	0.0858036	1.64891
ENSMUSG00000028843	Sh3bgrl3	3495.72	0.0990001	0.0896046	1.10485	0.269223	0.474044	0.569889
ENSMUSG00000038855	Itpkb	2249.77	-0.0746323	0.115279	-0.647405	0.51737	0.700886	0.286199
ENSMUSG00000035325	Sec31a	2782.64	0.100854	0.106237	0.949336	0.34245	0.550691	0.465403
ENSMUSG00000034908	Sidt2	3653.8	-0.574436	0.106907	-5.37321	7.73e-08	3.77e-06	7.11155
ENSMUSG00000037940	Inpp4b	5344.27	0.0279764	0.151568	0.184579	0.853559	0.924705	0.0687665
ENSMUSG00000024660	Incenp	3909.46	0.316622	0.0876165	3.61372	0.00030183	0.00361598	3.52024
ENSMUSG00000022148	Fyb	4851.55	-1.07796	0.360464	-2.99049	0.00278534	0.0190016	2.55512
ENSMUSG00000015961	Adss	2559.66	0.0603177	0.0991178	0.608546	0.542825	0.7212	0.26534
ENSMUSG00000024404	Riok3	2440.1	0.141759	0.102021	1.38951	0.164678	0.343043	0.783364
ENSMUSG00000020362	Cnot6	3815.19	-0.0241685	0.0896975	-0.269444	0.787588	0.885397	0.103701
ENSMUSG00000063286	Gm8995	4953.8	-0.881975	0.191674	-4.60142	4.2e-06	0.000115551	5.37715
ENSMUSG00000028757	Ddost	3142.84	0.28921	0.117121	2.46932	0.0135372	0.0594317	1.86847
ENSMUSG00000030058	Copg1	3038.93	0.118218	0.0898705	1.31543	0.188367	0.375214	0.724996
ENSMUSG00000069565	Dazap1	3143.27	0.38242	0.1305	2.93042	0.00338508	0.0218557	2.47043
ENSMUSG00000067851	Arfgef1	3244.06	-0.101105	0.0960414	-1.05272	0.292469	0.500109	0.53392
ENSMUSG00000055675	Kbtbd11	3360.23	-0.0896562	0.336779	-0.266217	0.790072	0.886734	0.102333
ENSMUSG00000034354	Mtmr3	3030.16	-0.220965	0.125038	-1.76719	0.0771972	0.20639	1.1124
ENSMUSG00000020572	Nampt	2346.33	0.312149	0.120197	2.59698	0.00940483	0.0460999	2.02665
ENSMUSG00000015176	Nolc1	3843.5	0.498076	0.15625	3.18768	0.00143419	0.0116084	2.84339
ENSMUSG00000026107	Nabp1	1939.04	-0.122331	0.110644	-1.10563	0.268887	0.473713	0.57043
ENSMUSG00000079477	Rab7	3435.83	0.166457	0.104986	1.58551	0.11285	0.267864	0.947497
ENSMUSG00000005763	Cd247	2146.1	0.130763	0.120705	1.08333	0.278661	0.484921	0.554924
ENSMUSG00000027030	Stk39	3625.76	0.557796	0.143076	3.89859	9.68e-05	0.00152451	4.01432
ENSMUSG00000019189	Rnf145	3068.72	-0.0612632	0.0917483	-0.667731	0.504305	0.690954	0.297306
ENSMUSG00000025278	Flnb	4366.14	0.0496283	0.110396	0.449547	0.653037	0.801622	0.185062
ENSMUSG00000028937	Acot7	2897.28	0.458391	0.132063	3.471	0.000518531	0.00541652	3.28523
ENSMUSG00000032959	Pebp1	2705.05	0.314367	0.122834	2.55928	0.010489	0.0498726	1.97926
ENSMUSG00000027433	Xrn2	3389.68	0.00311301	0.0945224	0.0329341	0.973727	0.987694	0.0115627
ENSMUSG00000041763	Tpp2	3007.42	0.0930836	0.0944932	0.985083	0.324583	0.532955	0.488674
ENSMUSG00000066568	Lsm14a	3198.15	-0.0422562	0.0940958	-0.449077	0.653376	0.801833	0.184837
ENSMUSG00000052085	Dock8	4207.96	-0.145689	0.118939	-1.2249	0.220611	0.417418	0.656373
ENSMUSG00000002812	Flii	3348.27	0.143086	0.0909244	1.57368	0.115562	0.271943	0.937185
ENSMUSG00000005481	Ddx39	3353.56	0.551144	0.146493	3.76225	0.000168391	0.00232917	3.77368
ENSMUSG00000074698	Csnk2a1	2931	0.0922768	0.0971877	0.94947	0.342382	0.55064	0.46549
ENSMUSG00000086583	Gm15500	2122.13	0.00139673	0.126714	0.0110227	0.991205	0.995568	0.00383637
ENSMUSG00000018446	C1qbp	2766.91	0.515539	0.156742	3.28909	0.00100512	0.0089428	2.99778
ENSMUSG00000026605	Cenpf	3736.65	-0.106386	0.101682	-1.04627	0.295438	0.503244	0.529533
ENSMUSG00000020923	Ubtf	4354.61	0.181194	0.112799	1.60635	0.108197	0.260138	0.965787
ENSMUSG00000024974	Smc3	3125.24	0.200299	0.0936207	2.13948	0.0323969	0.112156	1.4895
ENSMUSG00000028248	Pnisr	2986.4	-0.371324	0.122927	-3.02069	0.00252201	0.0176249	2.59825
ENSMUSG00000039159	Ube2h	2239.13	-1.32981	0.338832	-3.9247	8.68e-05	0.00139898	4.06129
ENSMUSG00000003402	Prkcsh	2687.59	0.147038	0.118508	1.24074	0.2147	0.410462	0.668168
ENSMUSG00000021832	Psmc6	2469.76	0.261936	0.0994493	2.63386	0.00844196	0.0425004	2.07356
ENSMUSG00000060671	Atp8b2	3867.03	-0.0440292	0.0949572	-0.463675	0.642881	0.794985	0.191869
ENSMUSG00000028423	Nfx1	3261.19	0.0981093	0.0967205	1.01436	0.310411	0.519525	0.508062
ENSMUSG00000017781	Pitpna	3154.24	0.292048	0.100845	2.896	0.0037795	0.0235738	2.42257
ENSMUSG00000030751	Psma1	2866.14	0.280506	0.110157	2.54642	0.0108834	0.0511341	1.96324
ENSMUSG00000020134	Peli1	1930.29	-0.117975	0.100049	-1.17918	0.238327	0.437975	0.622827
ENSMUSG00000041431	Ccnb1	3595.41	0.414789	0.134317	3.08814	0.00201415	0.0149749	2.69591
ENSMUSG00000038366	Lasp1	3549.61	0.100617	0.0971013	1.03621	0.300105	0.509121	0.522726
ENSMUSG00000022360	Atad2	4214.51	0.103126	0.10472	0.984777	0.324734	0.532955	0.488473
ENSMUSG00000027422	Rrbp1	1812.05	0.369509	0.102336	3.61075	0.00030531	0.00363836	3.51526
ENSMUSG00000027843	Ptpn22	2255.74	-0.446972	0.143985	-3.1043	0.00190729	0.0143941	2.71958
ENSMUSG00000056749	Nfil3	650.429	0.532875	0.149623	3.56145	0.000368818	0.00419601	3.43319
ENSMUSG00000010097	Nxf1	3382.96	-0.0339459	0.0907352	-0.37412	0.708315	0.838475	0.149774
ENSMUSG00000031659	Adcy7	4979.74	-0.209289	0.103822	-2.01585	0.043816	0.139329	1.35837
ENSMUSG00000092086	Gm6793	3169.87	0.456922	0.126421	3.6143	0.000301158	0.00361352	3.52121
ENSMUSG00000020272	Stk10	4157.33	-0.361417	0.116685	-3.09737	0.00195247	0.0146723	2.70942
ENSMUSG00000020456	Ogdh	3794.32	0.208818	0.0884096	2.36194	0.0181795	0.07367	1.74042
ENSMUSG00000026229	Psmd1	3093.63	0.337008	0.149715	2.251	0.0243854	0.0911671	1.61287
ENSMUSG00000024498	Tcerg1	3117.6	0.298929	0.114222	2.61708	0.0088686	0.0440448	2.05214
ENSMUSG00000060419	Rps16-ps2	2123.34	-0.0839167	0.106656	-0.786799	0.4314	0.629485	0.36512
ENSMUSG00000027997	Casp6	543.681	0.364763	0.132547	2.75197	0.00592388	0.0329146	2.22739
ENSMUSG00000020440	Arf5	2413.32	0.095413	0.101667	0.938486	0.347995	0.555701	0.458428
ENSMUSG00000024908	Ppp6r3	3103.2	0.00980711	0.0949705	0.103265	0.917753	0.958211	0.0372743
ENSMUSG00000015291	Gdi1	3121.53	-0.174387	0.0920856	-1.89375	0.0582578	0.170003	1.23465
ENSMUSG00000025369	Smarcc2	4095.54	0.0680074	0.0862328	0.788649	0.430317	0.628678	0.366211
ENSMUSG00000020994	Pnn	3255.41	0.211244	0.0867819	2.43419	0.0149252	0.0639413	1.82608
ENSMUSG00000041609	Bicdl1	1293.52	0.148806	0.10799	1.37796	0.168214	0.348005	0.774137
ENSMUSG00000073982	Rhog	2895.76	-0.239986	0.104176	-2.30366	0.0212417	0.0824011	1.67281
ENSMUSG00000031696	Vps35	2683.99	0.126576	0.103276	1.22561	0.220346	0.41697	0.656894
ENSMUSG00000075706	Gpx4	2546.22	0.0685508	0.116216	0.589855	0.555288	0.730394	0.255482
ENSMUSG00000028433	Ubap2	3732.04	0.215352	0.105862	2.03428	0.0419237	0.134626	1.37754
ENSMUSG00000005698	Ctcf	3375.28	-0.183768	0.107142	-1.71519	0.0863109	0.222964	1.06393
ENSMUSG00000020167	Tcf3	4127.79	0.0328918	0.101732	0.323318	0.746454	0.861531	0.126997
ENSMUSG00000058587	Tmod3	2578.5	-5.3e-05	0.0926796	-0.000571842	0.999544	0.999652	0.000198198
ENSMUSG00000024290	Rock1	2713.75	0.00145883	0.0974994	0.0149625	0.988062	0.994267	0.00521575
ENSMUSG00000095041	AC149090.1	2916.28	-0.619108	0.133121	-4.65071	3.31e-06	9.4e-05	5.48044
ENSMUSG00000027829	Ccnl1	2225.02	-0.259339	0.10796	-2.40217	0.0162983	0.0681949	1.78786
ENSMUSG00000002129	Sf3a1	3228.09	0.278988	0.11001	2.53602	0.0112122	0.0522068	1.95031
ENSMUSG00000039515	Ptpa	3411.82	0.212651	0.10672	1.9926	0.0463054	0.145029	1.33437
ENSMUSG00000052040	Klf13	2751.83	-0.658969	0.143806	-4.58236	4.6e-06	0.000123448	5.33746
ENSMUSG00000062683	Atp5g2	2305.36	0.156719	0.108582	1.44332	0.148932	0.320571	0.827013
ENSMUSG00000031532	Saraf	2471.75	-0.578656	0.15794	-3.66376	0.000248542	0.00309276	3.6046
ENSMUSG00000016554	Eif3d	2717.49	0.355281	0.117883	3.01386	0.0025795	0.0179303	2.58846
ENSMUSG00000029860	Zyx	3208.81	-0.301397	0.112247	-2.68512	0.00725043	0.0381065	2.13964
ENSMUSG00000023015	Racgap1	3691.87	0.118703	0.0945721	1.25516	0.209421	0.403699	0.678981
ENSMUSG00000041645	Ddx24	3549.29	0.198088	0.0993567	1.99371	0.0461838	0.144912	1.33551
ENSMUSG00000028108	Ecm1	915.486	-0.495314	0.162046	-3.05663	0.00223841	0.0162102	2.65006
ENSMUSG00000022255	Mtdh	3216.3	0.158541	0.104582	1.51595	0.129532	0.29336	0.887624
ENSMUSG00000054611	Kdm2a	2753.96	-0.185612	0.116647	-1.59123	0.111558	0.265844	0.952499
ENSMUSG00000031155	Pim2	1672.75	-1.00575	0.099378	-10.1205	4.48e-24	3.97e-21	23.3485
ENSMUSG00000024981	Acsl5	3480.63	0.238704	0.11348	2.1035	0.0354225	0.119715	1.45072
ENSMUSG00000032481	Smarcc1	3651.03	0.189283	0.106988	1.76919	0.0768615	0.206045	1.11429
ENSMUSG00000030697	Ppp4c	2967.24	0.319701	0.0945981	3.37957	0.000725989	0.00692125	3.13907
ENSMUSG00000033059	Pygb	2273.21	0.289543	0.104349	2.77475	0.00552441	0.0311664	2.25771
ENSMUSG00000013846	St3gal1	1757.17	0.0727224	0.111048	0.654874	0.512549	0.69705	0.290265
ENSMUSG00000037236	Matr3	2330.93	0.106102	0.0955658	1.11025	0.26689	0.471298	0.573667
ENSMUSG00000028906	Epb41	1744.23	0.0245842	0.0967827	0.254014	0.799485	0.892245	0.0971899
ENSMUSG00000035011	Zbtb7a	2461.15	0.0507077	0.116636	0.434752	0.663743	0.808504	0.178
ENSMUSG00000032515	Csrnp1	1479.48	0.195576	0.131934	1.48237	0.138241	0.305908	0.859364
ENSMUSG00000026034	Clk1	1647.25	-0.552069	0.147049	-3.75432	0.000173815	0.002378	3.75991
ENSMUSG00000025025	Mxi1	2461.79	-0.160005	0.15034	-1.06429	0.287198	0.4939	0.541818
ENSMUSG00000021131	Erh	2890.19	0.367164	0.140439	2.61441	0.00893808	0.044283	2.04876
ENSMUSG00000026478	Lamc1	1242.81	-0.206565	0.108796	-1.89865	0.0576109	0.168634	1.2395
ENSMUSG00000041870	Ankrd13a	3354.05	0.00035664	0.0912148	0.00390989	0.99688	0.998009	0.00135696
ENSMUSG00000020530	Ggnbp2	2904.1	0.0914407	0.0883801	1.03463	0.300842	0.509819	0.521662
ENSMUSG00000021733	Slc4a7	2813.6	0.112866	0.123157	0.916435	0.359439	0.566284	0.444375
ENSMUSG00000024308	Tapbp	3862.1	-0.174975	0.102112	-1.71356	0.0866105	0.223278	1.06243
ENSMUSG00000052833	Sae1	3575.56	0.329446	0.116383	2.83069	0.00464474	0.027426	2.33304
ENSMUSG00000020671	Rab10	2856.99	0.069347	0.0892405	0.77708	0.437112	0.634623	0.359407
ENSMUSG00000020149	Rab1	2325.4	0.19229	0.106716	1.80189	0.0715635	0.195708	1.14531
ENSMUSG00000046062	Ppp1r15b	2797.45	0.254309	0.102493	2.48122	0.0130932	0.0581778	1.88295
ENSMUSG00000038644	Pold1	3529.21	0.327163	0.124898	2.61945	0.00880709	0.0438694	2.05517
ENSMUSG00000020267	Hint1	2749.69	0.461822	0.130299	3.54432	0.000393633	0.00438233	3.40491
ENSMUSG00000047153	Khnyn	3097.79	-0.762511	0.18451	-4.13262	3.59e-05	0.000688214	4.44532
ENSMUSG00000020088	Sar1a	2785.82	0.149564	0.0977417	1.53019	0.125969	0.288632	0.899737
ENSMUSG00000020827	Mink1	2885.71	0.130259	0.0923785	1.41006	0.158522	0.334569	0.799909
ENSMUSG00000021807	Rtraf	2195.5	0.0149947	0.101249	0.148098	0.882266	0.939723	0.0544006
ENSMUSG00000019818	Cd164	2673.21	-0.137125	0.11763	-1.16573	0.243724	0.444351	0.613102
ENSMUSG00000035726	Supt16	3623.35	0.119981	0.106994	1.12138	0.262126	0.466825	0.58149
ENSMUSG00000031068	Glrx3	2360.6	0.216317	0.114072	1.89632	0.0579173	0.169367	1.23719
ENSMUSG00000025757	Hspa4l	1508.38	-0.317347	0.108267	-2.93116	0.003377	0.0218129	2.47147
ENSMUSG00000032434	Cmtm6	3987.61	0.15326	0.0947343	1.61779	0.105709	0.255667	0.975888
ENSMUSG00000001280	Sp1	2949.37	0.0452062	0.0936556	0.482685	0.629319	0.785449	0.201129
ENSMUSG00000037172	E330009J07Rik	1031.34	-0.0697244	0.121861	-0.572163	0.567212	0.740628	0.246255
ENSMUSG00000028792	Ak2	3184.96	0.890507	0.149266	5.9659	2.43e-09	1.75e-07	8.61387
ENSMUSG00000029547	Ints1	3277.19	0.130127	0.102474	1.26984	0.20414	0.396105	0.690072
ENSMUSG00000027091	Zc3h15	2554.49	0.219289	0.129768	1.68985	0.0910565	0.231533	1.04069
ENSMUSG00000029401	Rilpl2	2313.43	-0.0790349	0.128883	-0.61323	0.539724	0.719203	0.267828
ENSMUSG00000004936	Map2k1	2624.84	0.0665476	0.107872	0.616911	0.537294	0.717314	0.269788
ENSMUSG00000037072	Selenof	2291.92	0.0591722	0.119596	0.494766	0.620765	0.779086	0.207072
ENSMUSG00000023852	Chd1	2897.63	0.231355	0.105113	2.20102	0.0277349	0.100077	1.55697
ENSMUSG00000001156	Mxd1	1579.11	-1.4431	0.188258	-7.66553	1.78e-14	3.35e-12	13.7493
ENSMUSG00000086841	2410006H16Rik	1093.17	-0.209	0.110066	-1.89886	0.0575832	0.168619	1.2397
ENSMUSG00000005087	Cd44	3845.28	0.385822	0.12344	3.12557	0.00177458	0.0136102	2.7509
ENSMUSG00000024725	Ostf1	2401.05	-0.0219097	0.106579	-0.205573	0.837125	0.916002	0.0772098
ENSMUSG00000027782	Kpna4	2799.57	0.113261	0.118934	0.952296	0.340947	0.549565	0.467313
ENSMUSG00000036737	Oxsr1	2083.53	0.148517	0.106901	1.38929	0.164745	0.343128	0.783188
ENSMUSG00000085442	Gm3362	1991.16	-0.0862759	0.100771	-0.856155	0.391912	0.595007	0.406811
ENSMUSG00000042524	Sun2	3900.07	-0.499478	0.157854	-3.16419	0.00155518	0.0123381	2.80822
ENSMUSG00000052331	Ankrd44	3518.05	-0.16819	0.121212	-1.38756	0.16527	0.343754	0.781805
ENSMUSG00000071054	Safb	2943.27	0.0882097	0.0925752	0.952844	0.340669	0.549294	0.467667
ENSMUSG00000026430	Rassf5	3814.81	0.00374459	0.115202	0.0325045	0.97407	0.987907	0.0114099
ENSMUSG00000074151	Nlrc5	2592.27	0.0844751	0.130412	0.647757	0.517142	0.700703	0.28639
ENSMUSG00000026457	Adipor1	2204.71	-0.00965149	0.0967164	-0.0997917	0.92051	0.960091	0.0359716
ENSMUSG00000053907	Mat2a	4193.09	0.344547	0.128089	2.6899	0.00714732	0.0377093	2.14586
ENSMUSG00000041736	Tspo	1992.97	0.0439525	0.139075	0.316035	0.751976	0.865356	0.123796
ENSMUSG00000002524	Puf60	2942.15	0.25623	0.107454	2.38456	0.0170994	0.0706634	1.76702
ENSMUSG00000032301	Psma4	2813.28	0.345602	0.118145	2.92522	0.00344209	0.022129	2.46318
ENSMUSG00000025228	Actr1a	2942.27	0.277987	0.118847	2.33904	0.0193335	0.0770029	1.71369
ENSMUSG00000070733	Fryl	3059.91	-0.664653	0.149535	-4.44481	8.8e-06	0.00021511	5.05567
ENSMUSG00000029817	Tra2a	2811.39	0.048182	0.0985764	0.488778	0.624999	0.782313	0.204121
ENSMUSG00000025745	Hadha	2763.6	0.0362801	0.0896622	0.404631	0.685749	0.824376	0.163835
ENSMUSG00000058006	Mdn1	3242.53	0.208883	0.140091	1.49104	0.13595	0.302664	0.866621
ENSMUSG00000035021	Baz1a	2897.04	0.433042	0.134767	3.21326	0.00131237	0.0108617	2.88194
ENSMUSG00000031093	Dock11	2277.36	-0.203152	0.113226	-1.79422	0.0727787	0.198291	1.138
ENSMUSG00000084349	Rpl3-ps1	1877.27	0.119574	0.119315	1.00217	0.316261	0.52457	0.499954
ENSMUSG00000021877	Arf4	2458.66	0.27857	0.122018	2.28303	0.0224288	0.0857694	1.64919
ENSMUSG00000031939	Taf1d	2204.38	0.307229	0.116998	2.62593	0.0086412	0.0432864	2.06343
ENSMUSG00000020733	Slc9a3r1	3750	0.322674	0.0954551	3.38037	0.000723882	0.00690991	3.14033
ENSMUSG00000013593	Ndufs2	2595.09	0.0845626	0.10471	0.807591	0.419326	0.619854	0.377448
ENSMUSG00000031933	Izumo1r	4040.74	0.128039	0.0926071	1.3826	0.166786	0.346142	0.77784
ENSMUSG00000006418	Rnf114	2798	-0.195474	0.122683	-1.59333	0.111086	0.265156	0.954342
ENSMUSG00000003161	Sri	2982.71	-0.0296907	0.0957253	-0.310166	0.756435	0.867863	0.121228
ENSMUSG00000004530	Coro1c	3181.83	0.485239	0.116196	4.17605	2.97e-05	0.000593644	4.5278
ENSMUSG00000029723	Tsc22d4	2805.16	-0.206143	0.117959	-1.74759	0.0805358	0.212268	1.09401
ENSMUSG00000109511	Nup62	2856.05	0.358137	0.130328	2.74796	0.0059968	0.0331729	2.22208
ENSMUSG00000028560	Usp1	3337.37	0.307423	0.100748	3.05142	0.00227764	0.0164311	2.64251
ENSMUSG00000020250	Txnrd1	3042.81	0.575651	0.146935	3.91773	8.94e-05	0.00142779	4.04873
ENSMUSG00000020196	Cabin1	2712.52	0.234082	0.100542	2.32819	0.0199022	0.0786637	1.7011
ENSMUSG00000025651	Uqcrc1	2990.06	0.301597	0.113764	2.65109	0.00802333	0.0409541	2.09565
ENSMUSG00000032093	Cd3e	3005.85	-0.363601	0.129789	-2.80147	0.00508703	0.0293811	2.29354
ENSMUSG00000052013	Btla	2565.26	0.483468	0.118289	4.08716	4.37e-05	0.000803135	4.35984
ENSMUSG00000034724	Cnot6l	3533.1	-0.274969	0.0951019	-2.89131	0.00383642	0.0238498	2.41607
ENSMUSG00000014313	Cox6c	2161.31	0.0554951	0.117318	0.473031	0.636191	0.790281	0.196412
ENSMUSG00000058301	Upf1	3311.31	0.224772	0.112238	2.00265	0.0452153	0.142604	1.34471
ENSMUSG00000063410	Stk24	2979.58	-0.248376	0.103871	-2.39119	0.0167937	0.0698021	1.77485
ENSMUSG00000031557	Plekha2	2542.95	0.156766	0.101172	1.54951	0.12126	0.28092	0.916282
ENSMUSG00000050628	Ubald2	1093.64	-0.0490462	0.134289	-0.365229	0.714941	0.84256	0.14573
ENSMUSG00000018076	Med13l	1404.85	0.239519	0.141897	1.68798	0.0914147	0.23201	1.03898
ENSMUSG00000066621	Tecpr1	3455.43	-1.18036	0.191931	-6.1499	7.75e-10	6.21e-08	9.11052
ENSMUSG00000040848	Sft2d2	2708.41	-0.232233	0.126929	-1.82962	0.0673068	0.187679	1.17194
ENSMUSG00000038406	Scaf1	3213.03	0.0846323	0.0899871	0.940494	0.346964	0.554657	0.459715
ENSMUSG00000031708	Tecr	3077.42	0.178136	0.09526	1.86999	0.0614847	0.176509	1.21123
ENSMUSG00000025283	Sat1	1784.91	-0.778479	0.101054	-7.70358	1.32e-14	2.55e-12	13.8784
ENSMUSG00000048277	Syngr2	3118.02	0.0645205	0.141262	0.456743	0.647856	0.798131	0.188522
ENSMUSG00000045328	Cenpe	3233.87	0.0141793	0.0926641	0.153018	0.878384	0.937894	0.0563157
ENSMUSG00000055839	Elob	2722.75	0.172196	0.139228	1.23679	0.216164	0.412311	0.665217
ENSMUSG00000046865	Fbl	2764.52	0.496695	0.132767	3.7411	0.000183217	0.0024796	3.73704
ENSMUSG00000052337	Immt	2785.33	0.207253	0.119313	1.73705	0.0823777	0.215389	1.08419
ENSMUSG00000055302	Mrfap1	3071.9	0.183586	0.120803	1.51972	0.128582	0.292088	0.890819
ENSMUSG00000020454	Eif4enif1	3339.32	0.545858	0.134606	4.05524	5.01e-05	0.000902486	4.30031
ENSMUSG00000038690	Atp5j2	2286.83	0.192844	0.121939	1.58147	0.11377	0.269325	0.943972
ENSMUSG00000037149	Ddx1	3186.91	0.189402	0.118381	1.59994	0.109611	0.262409	0.960144
ENSMUSG00000034832	Tet3	2965.88	-0.296269	0.118476	-2.50067	0.0123959	0.0557855	1.90672
ENSMUSG00000020841	Cpd	5789.61	0.267721	0.123285	2.17156	0.0298887	0.105858	1.52449
ENSMUSG00000026123	Plekhb2	2345.89	-0.335276	0.116327	-2.88218	0.00394936	0.0242516	2.40347
ENSMUSG00000111394	AC160637.1	1534.62	-0.0587055	0.13288	-0.441794	0.658638	0.805172	0.181353
ENSMUSG00000002489	Tiam1	2052.69	-0.201506	0.124683	-1.61615	0.106062	0.256316	0.974439
ENSMUSG00000079363	Gbp4	1111.81	-0.376785	0.183106	-2.05774	0.0396154	0.129467	1.40214
ENSMUSG00000030718	Ppme1	1850.84	0.0732299	0.132076	0.554453	0.579269	0.748651	0.23712
ENSMUSG00000033545	Znrf1	2956.16	-0.0709639	0.10082	-0.703867	0.481516	0.671022	0.317389
ENSMUSG00000023048	Prr13	3402.04	-0.181375	0.100514	-1.80448	0.0711566	0.194984	1.14778
ENSMUSG00000019866	Crybg1	1390.44	0.354773	0.134467	2.63838	0.00833043	0.042122	2.07933
ENSMUSG00000027087	Itgav	2319.82	0.15957	0.107351	1.48643	0.137166	0.304385	0.862754
ENSMUSG00000020458	Rtn4	2885.09	0.0503684	0.126452	0.398322	0.690393	0.827495	0.160904
ENSMUSG00000030168	Adipor2	2912.65	-0.110318	0.0950747	-1.16033	0.245915	0.446453	0.609214
ENSMUSG00000019804	Snx3	3132.41	0.363956	0.118222	3.07859	0.00207984	0.0153647	2.68197
ENSMUSG00000037754	Ppp1r16b	2273.46	-0.158945	0.0988302	-1.60826	0.107777	0.259461	0.967472
ENSMUSG00000121093		1676.83	-1.51983	0.14967	-10.1545	3.16e-24	2.98e-21	23.4999
ENSMUSG00000039168	Dap	2367.29	-0.365121	0.113698	-3.21131	0.0013213	0.0109236	2.879
ENSMUSG00000028514	Usp24	3057.95	0.17993	0.110533	1.62783	0.103561	0.252274	0.984805
ENSMUSG00000053841	Txlna	3058.44	0.310832	0.11494	2.7043	0.00684476	0.0366002	2.16464
ENSMUSG00000057948	Unc13d	2968.67	0.133158	0.0938363	1.41905	0.155885	0.330473	0.807196
ENSMUSG00000014498	Ankrd52	3460.86	0.248467	0.108169	2.29704	0.0216166	0.0834044	1.66521
ENSMUSG00000020640	Itsn2	2609.42	-0.0911353	0.106464	-0.856017	0.391988	0.595034	0.406727
ENSMUSG00000032000	Birc3	2055.15	-0.274566	0.0942355	-2.91361	0.00357273	0.0227456	2.447
ENSMUSG00000007659	Bcl2l1	2798.19	0.262189	0.172467	1.52023	0.128453	0.291882	0.891256
ENSMUSG00000036461	Elf1	2964.11	-0.0619938	0.104681	-0.592217	0.553705	0.72938	0.256721
ENSMUSG00000027177	Hipk3	2319.34	0.0350646	0.0999845	0.3507	0.725813	0.849701	0.139175
ENSMUSG00000033184	Tmed7	2272.11	0.0548405	0.0998327	0.549324	0.582783	0.751465	0.234493
ENSMUSG00000035621	Midn	2162.58	-0.0611909	0.100541	-0.608619	0.542777	0.7212	0.265379
ENSMUSG00000072235	Tuba1a	3003.14	0.35164	0.110517	3.18176	0.00146381	0.0117785	2.83452
ENSMUSG00000020074	Ccar1	3061.64	0.0658866	0.100925	0.652826	0.513868	0.698214	0.289148
ENSMUSG00000002897	Il17ra	1499.2	-0.634617	0.180457	-3.51673	0.000436904	0.00474828	3.35961
ENSMUSG00000026116	Tmem131	2618.32	-0.523471	0.120862	-4.33115	1.48e-05	0.000335986	4.82877
ENSMUSG00000033596	Rfwd3	3296.45	0.179915	0.0968943	1.85682	0.0633369	0.179906	1.19834
ENSMUSG00000024513	Mbd2	2912.64	-0.0539273	0.0956839	-0.563598	0.573028	0.744289	0.241824
ENSMUSG00000034243	Golgb1	2212.76	-0.264541	0.10965	-2.41261	0.0158389	0.0667546	1.80028
ENSMUSG00000020476	Dbnl	2998.15	0.262621	0.0932916	2.81506	0.00487688	0.0285497	2.31186
ENSMUSG00000040242	Fgfr1op2	2451.05	0.0297176	0.0986876	0.301128	0.763317	0.871431	0.117295
ENSMUSG00000037062	Sh3glb1	1879.87	-0.0666467	0.100715	-0.661732	0.508143	0.693688	0.294014
ENSMUSG00000035199	Arl6ip5	2259.41	-0.154022	0.118903	-1.29536	0.195197	0.384095	0.709528
ENSMUSG00000021298	Gpr132	2232.88	-0.390267	0.132565	-2.94397	0.00324036	0.0212308	2.48941
ENSMUSG00000025348	Itga7	1477.68	-1.77075	0.773981	-2.28785	0.0221465	0.0849485	1.65469
ENSMUSG00000031751	Amfr	2612.48	-0.0280394	0.0942771	-0.297415	0.76615	0.873091	0.115686
ENSMUSG00000057672	Pkn1	3039.18	-0.0391419	0.131045	-0.29869	0.765177	0.872642	0.116238
ENSMUSG00000041057	Wdr43	2771.39	0.419479	0.143054	2.93231	0.00336451	0.0217677	2.47308
ENSMUSG00000002718	Cse1l	3215.08	0.334464	0.123254	2.71363	0.00665513	0.0358278	2.17684
ENSMUSG00000038264	Sema7a	1329.98	0.288011	0.16654	1.72938	0.0837407	0.217856	1.07706
ENSMUSG00000028249	Sdcbp	2236.17	-0.107892	0.102585	-1.05173	0.292924	0.500717	0.533245
ENSMUSG00000024735	Prpf19	2988.94	0.547201	0.137678	3.97451	7.05e-05	0.00118551	4.15166
ENSMUSG00000032575	Manf	2123.16	0.67074	0.171455	3.91203	9.15e-05	0.00145883	4.03847
ENSMUSG00000036093	Arl5a	2175.37	0.0711282	0.103443	0.68761	0.491699	0.680678	0.308301
ENSMUSG00000027306	Nusap1	2862.23	-0.0221959	0.115364	-0.192399	0.84743	0.921649	0.0718963
ENSMUSG00000020027	Socs2	5771.84	0.239587	0.141556	1.69253	0.090545	0.230647	1.04314
ENSMUSG00000079426	Arpc4	2935.42	0.269606	0.106521	2.53101	0.0113735	0.0527624	1.9441
ENSMUSG00000020390	Ube2b	2339.2	-0.574575	0.117155	-4.90439	9.37e-07	3.24e-05	6.02817
ENSMUSG00000016619	Nup50	2455.66	0.236856	0.106175	2.23081	0.0256939	0.094848	1.59017
ENSMUSG00000039671	Zmynd8	2762.4	-0.166864	0.109182	-1.52831	0.126436	0.289262	0.898131
ENSMUSG00000014859	E2f4	2721.09	0.363154	0.119925	3.02816	0.00246044	0.0173428	2.60899
ENSMUSG00000030180	Kdm5a	2186.58	-0.413596	0.118236	-3.49804	0.000468687	0.00499634	3.32912
ENSMUSG00000038179	Slamf7	403.115	-0.472263	0.27304	-1.72965	0.0836931	0.21777	1.07731
ENSMUSG00000042207	Kdm5b	1810.51	-1.09369	0.167497	-6.52958	6.6e-11	6.76e-09	10.1807
ENSMUSG00000025823	Pdia4	2759.98	0.309094	0.119841	2.57919	0.00990311	0.0479032	2.00423
ENSMUSG00000015889	Lta4h	3310.62	0.342503	0.102425	3.34393	0.000826	0.00767553	3.08302
ENSMUSG00000032407	U2surp	2820.2	0.0527004	0.110479	0.477017	0.63335	0.788038	0.198356
ENSMUSG00000030216	Wbp11	2908.96	0.291831	0.110581	2.63908	0.00831316	0.042077	2.08023
ENSMUSG00000028156	Eif4e	2674.71	0.447765	0.138217	3.23957	0.00119709	0.0100909	2.92187
ENSMUSG00000030120	Mlf2	2843.86	0.310755	0.121563	2.55633	0.0105784	0.0501549	1.97558
ENSMUSG00000026778	Prkcq	2754.78	-0.251351	0.134196	-1.87301	0.0610667	0.175711	1.2142
ENSMUSG00000031885	Cbfb	2808.98	0.211892	0.100587	2.10655	0.0351568	0.119171	1.45399
ENSMUSG00000041571	Selenow	2607.41	0.0980734	0.124643	0.786832	0.43138	0.629485	0.36514
ENSMUSG00000015837	Sqstm1	1993.69	-0.366359	0.10304	-3.55552	0.000377234	0.00425958	3.42339
ENSMUSG00000076432	Ywhaq	3219.79	0.203298	0.121894	1.66783	0.0953491	0.238266	1.02068
ENSMUSG00000024851	Pitpnm1	2896.66	-0.379985	0.109876	-3.45831	0.000543585	0.00559467	3.26473
ENSMUSG00000021453	Gadd45g	666.826	0.171996	0.225779	0.761792	0.446184	0.641256	0.350486
ENSMUSG00000002102	Psmc3	2788.29	0.365199	0.109198	3.34438	0.000824669	0.00767553	3.08372
ENSMUSG00000060657	Marf1	2448.22	-0.413886	0.108115	-3.8282	0.000129081	0.00187498	3.88914
ENSMUSG00000014349	Ube2z	2662.28	0.0675329	0.108841	0.620473	0.534946	0.71505	0.27169
ENSMUSG00000038546	Ranbp9	1867.29	0.0206347	0.105454	0.195675	0.844864	0.920115	0.0732131
ENSMUSG00000032322	Pstpip1	1611.72	-0.150776	0.102319	-1.47359	0.140593	0.309161	0.852036
ENSMUSG00000033943	Mga	2670.76	-0.15504	0.0888117	-1.74572	0.0808598	0.212785	1.09227
ENSMUSG00000024045	Akap8	3164.73	0.0658641	0.0999196	0.659172	0.509786	0.69486	0.292612
ENSMUSG00000069769	Msi2	2274.25	-0.187717	0.0942095	-1.99254	0.0463113	0.145029	1.33431
ENSMUSG00000023025	Larp4	2911.9	0.218294	0.12923	1.68918	0.091184	0.231678	1.04008
ENSMUSG00000043411	Usp48	2464.58	0.059354	0.0991098	0.598871	0.549259	0.725426	0.260223
ENSMUSG00000003345	Csnk1g2	2752.66	0.0356636	0.10213	0.349197	0.726941	0.850083	0.138501
ENSMUSG00000029649	Pomp	2105.21	0.435744	0.166386	2.61888	0.00882194	0.0439016	2.05444
ENSMUSG00000024583	Txnl1	2129.67	0.355604	0.113861	3.12313	0.00178937	0.0136888	2.7473
ENSMUSG00000020015	Cdk17	2437.76	0.0119855	0.0922728	0.129892	0.896652	0.947609	0.047376
ENSMUSG00000019173	Rab5c	2917.53	0.352446	0.107408	3.28136	0.00103306	0.00911602	2.98587
ENSMUSG00000048874	Phf3	2470.99	-0.296457	0.095764	-3.0957	0.00196349	0.0147085	2.70697
ENSMUSG00000032199	Polr2m	2601.12	0.057449	0.0953159	0.602722	0.546694	0.723811	0.262256
ENSMUSG00000020936	Nmt1	2342.12	0.371098	0.103355	3.59054	0.000329997	0.00387129	3.48149
ENSMUSG00000033499	Larp4b	3106.16	0.0750957	0.0901921	0.83262	0.405059	0.607097	0.392482
ENSMUSG00000020705	Ddx42	2671.5	0.0497788	0.0890883	0.558759	0.576326	0.746925	0.239331
ENSMUSG00000059552	Trp53	2952.57	0.0774721	0.0890429	0.870054	0.384271	0.588068	0.415362
ENSMUSG00000028822	Tmem50a	2340.43	-0.0238584	0.0919325	-0.259521	0.795233	0.889708	0.0995054
ENSMUSG00000022200	Golph3	2543.99	-0.113361	0.0972467	-1.1657	0.243735	0.444351	0.613082
ENSMUSG00000040270	Bach2	2284.19	-0.998589	0.14114	-7.07518	1.49e-12	2.01e-10	11.8261
ENSMUSG00000047898	Ccr4	4787.28	-0.0828322	0.128004	-0.647107	0.517562	0.701065	0.286037
ENSMUSG00000004364	Cul3	2558.99	-0.0153451	0.0995028	-0.154218	0.877438	0.937698	0.0567835
ENSMUSG00000057230	Aak1	3005.06	-0.310548	0.14347	-2.16454	0.0304226	0.107194	1.5168
ENSMUSG00000029385	Ccng2	1526.02	-0.696181	0.358588	-1.94145	0.0522039	0.15791	1.2823
ENSMUSG00000019877	Serinc1	1977.47	-0.0855986	0.103415	-0.827721	0.407828	0.609254	0.389522
ENSMUSG00000058569	Tmed9	2142.11	0.265094	0.14145	1.87412	0.060914	0.175372	1.21528
ENSMUSG00000059273	Zc3h4	2967.3	0.00145615	0.100633	0.0144699	0.988455	0.994441	0.00504307
ENSMUSG00000032178	Ilf3	2564.79	0.256177	0.115138	2.22495	0.0260844	0.09573	1.58362
ENSMUSG00000018567	Gabarap	2167.98	-0.108745	0.0967993	-1.12341	0.261263	0.465563	0.582922
ENSMUSG00000001017	Chtop	2890.52	0.301503	0.0927235	3.25164	0.00114742	0.00982021	2.94028
ENSMUSG00000029014	Dnajc2	2304.23	0.339683	0.126776	2.6794	0.0073754	0.0385348	2.13221
ENSMUSG00000030824	Nucb1	2789.88	0.149556	0.0939147	1.59246	0.111281	0.265435	0.95358
ENSMUSG00000062234	Gak	2795.26	0.0186703	0.0877012	0.212886	0.831416	0.912069	0.0801816
ENSMUSG00000027006	Dnajc10	3464.25	-0.0615717	0.112854	-0.545588	0.585349	0.75257	0.232585
ENSMUSG00000021840	Mapk1ip1l	2552.8	0.230866	0.103304	2.23481	0.0254295	0.0942135	1.59466
ENSMUSG00000014444	Piezo1	2839.65	0.390078	0.142246	2.74228	0.00610142	0.0336528	2.21457
ENSMUSG00000070738	Dgkd	3161.43	-0.246633	0.128317	-1.92205	0.0545991	0.162503	1.26281
ENSMUSG00000026924	Sec16a	2528.71	-0.0615378	0.094787	-0.649222	0.516195	0.700112	0.287186
ENSMUSG00000040345	Arhgap9	3129.71	-0.331942	0.143134	-2.3191	0.0203894	0.0799599	1.69059
ENSMUSG00000032042	Srpr	2324.43	0.220886	0.129052	1.71161	0.0869691	0.223884	1.06064
ENSMUSG00000028522	Mier1	2296.08	0.0672141	0.0890549	0.754749	0.450399	0.644534	0.346402
ENSMUSG00000034765	Dusp5	1788.63	0.569881	0.152186	3.74464	0.00018065	0.00245368	3.74316
ENSMUSG00000002844	Adprh	2716.72	0.234319	0.107919	2.17126	0.0299117	0.105889	1.52416
ENSMUSG00000022698	Naa50	3125.09	0.37939	0.121292	3.12791	0.00176053	0.0135508	2.75436
ENSMUSG00000027510	Rbm38	3533.01	-0.422718	0.107788	-3.92174	8.79e-05	0.00140916	4.05596
ENSMUSG00000027203	Dut	3084.58	0.528449	0.131134	4.02985	5.58e-05	0.000982132	4.25327
ENSMUSG00000000420	Galnt1	3399.21	-0.163487	0.108822	-1.50233	0.133012	0.298192	0.876111
ENSMUSG00000016831	Tox4	2270.99	0.070856	0.0954867	0.742051	0.458056	0.650609	0.339081
ENSMUSG00000063882	Uqcrh	2047.69	-0.0473984	0.0940095	-0.504188	0.61413	0.773658	0.21174
ENSMUSG00000042625	Safb2	2765.46	0.0936213	0.0942837	0.992974	0.320723	0.52885	0.49387
ENSMUSG00000094483	Purb	2510.54	0.162446	0.0973356	1.66892	0.0951327	0.237958	1.02167
ENSMUSG00000040462	Os9	2636.3	-0.0447027	0.0929254	-0.48106	0.630474	0.786031	0.200333
ENSMUSG00000022536	Glyr1	2870.27	0.0805895	0.0981777	0.820853	0.41173	0.613077	0.385388
ENSMUSG00000051495	Irf2bp2	2929.15	-0.0426063	0.0952893	-0.447126	0.654784	0.802665	0.183902
ENSMUSG00000040824	Snrpd2	2130.38	0.33855	0.149833	2.25952	0.023851	0.0897946	1.62249
ENSMUSG00000037475	Thoc2	2579.86	-0.143167	0.106787	-1.34068	0.180026	0.363258	0.744666
ENSMUSG00000033016	Nfatc1	3373.04	-0.0636445	0.10459	-0.608516	0.542845	0.7212	0.265324
ENSMUSG00000026626	Ppp2r5a	2351.94	-0.386096	0.10951	-3.52567	0.000422417	0.00463429	3.37426
ENSMUSG00000098112	Bin2	2875.05	-0.202568	0.109271	-1.85381	0.0637668	0.180719	1.19541
ENSMUSG00000028961	Pgd	2499.03	0.393341	0.110344	3.56467	0.000364309	0.00416357	3.43853
ENSMUSG00000048170	Mcmbp	2897.12	0.0765454	0.0987757	0.774942	0.438374	0.635659	0.358155
ENSMUSG00000028484	Psip1	2608.07	0.134933	0.0919599	1.46731	0.142293	0.311716	0.846817
ENSMUSG00000042744	Hectd4	2657.28	-0.366622	0.145737	-2.51564	0.0118816	0.0542816	1.92513
ENSMUSG00000031314	Taf1	2767.52	-0.0296109	0.0881095	-0.336069	0.736819	0.85598	0.132639
ENSMUSG00000024283	Wac	2269.92	-0.0800467	0.0966264	-0.828415	0.407436	0.609129	0.389941
ENSMUSG00000027347	Rasgrp1	3402.8	-0.0921214	0.13721	-0.671392	0.501971	0.689198	0.299321
ENSMUSG00000053293	Pom121	3028.14	0.177771	0.119226	1.49104	0.135951	0.302664	0.866619
ENSMUSG00000040111	Gramd1b	3495.46	0.198934	0.166655	1.19369	0.232601	0.431274	0.633389
ENSMUSG00000023088	Abcc1	2153.31	0.392162	0.119972	3.26879	0.0010801	0.00940438	2.96654
ENSMUSG00000017778	Cox7c	1888.55	0.10338	0.117016	0.883467	0.376984	0.582717	0.423677
ENSMUSG00000028851	Nudc	2976.47	0.526177	0.150287	3.50116	0.000463246	0.0049594	3.33419
ENSMUSG00000034667	Xpot	2364.69	0.348444	0.135738	2.56703	0.0102573	0.0490961	1.98897
ENSMUSG00000031133	Arhgef6	2511.33	-0.0190775	0.124454	-0.15329	0.87817	0.937894	0.0564214
ENSMUSG00000052752	Traf7	2425.88	0.147208	0.0929046	1.58451	0.113078	0.268324	0.946623
ENSMUSG00000035722	Abca7	3353.02	-0.426653	0.127775	-3.3391	0.000840506	0.00778153	3.07546
ENSMUSG00000041720	Pi4ka	2445.68	0.0943805	0.0884516	1.06703	0.285958	0.492611	0.543697
ENSMUSG00000017670	Elmo2	1811.83	0.691735	0.11671	5.92695	3.09e-09	2.15e-07	8.51059
ENSMUSG00000052459	Atp6v1a	2386.02	0.319305	0.119871	2.66373	0.00772796	0.0397659	2.11194
ENSMUSG00000029642	Polr1d	2026.79	0.136991	0.127378	1.07547	0.282164	0.488701	0.549498
ENSMUSG00000025060	Slk	2375.27	0.122524	0.0987724	1.24047	0.214801	0.410551	0.667963
ENSMUSG00000027718	Il21	101.39	2.53837	0.423329	5.9962	2.02e-09	1.49e-07	8.69469
ENSMUSG00000022186	Oxct1	3200.2	0.0173043	0.109853	0.157523	0.874833	0.936441	0.0580751
ENSMUSG00000020184	Mdm2	1972.54	0.0288708	0.101088	0.285602	0.775183	0.878665	0.110596
ENSMUSG00000039967	Zfp292	2311.68	-0.514405	0.129808	-3.96282	7.41e-05	0.00122873	4.13037
ENSMUSG00000003778	Brd8	2152.93	0.0481761	0.0954331	0.504815	0.613689	0.773404	0.212052
ENSMUSG00000069539	Scyl2	1853.49	-0.285075	0.0979097	-2.91161	0.0035957	0.0228435	2.44422
ENSMUSG00000024835	Coro1b	2780.66	-0.0285583	0.0929136	-0.307364	0.758566	0.869086	0.120006
ENSMUSG00000034926	Dhcr24	3307.19	0.581642	0.139412	4.1721	3.02e-05	0.000599417	4.52028
ENSMUSG00000026491	Ahctf1	2776.85	0.161961	0.111896	1.44742	0.147779	0.319093	0.830388
ENSMUSG00000036333	Kidins220	2408.22	-0.238392	0.102218	-2.33218	0.019691	0.0780748	1.70573
ENSMUSG00000044791	Setd2	2456.27	-0.206715	0.0972639	-2.12529	0.033562	0.115047	1.47415
ENSMUSG00000028693	Nasp	2792.77	0.33439	0.127978	2.61287	0.00897851	0.0444295	2.0468
ENSMUSG00000040723	Rcsd1	4299.25	-0.149359	0.120047	-1.24417	0.213437	0.408924	0.67073
ENSMUSG00000070327	Rnf213	4233.65	0.00582197	0.149011	0.0390707	0.968834	0.985159	0.0137506
ENSMUSG00000037013	Ss18	2253.21	-0.157702	0.0982837	-1.60456	0.108591	0.260879	0.964205
ENSMUSG00000042423	Fbrs	2890.93	-0.379932	0.116816	-3.2524	0.00114435	0.00980512	2.94144
ENSMUSG00000022241	Tars	2308.57	0.622612	0.135278	4.60248	4.17e-06	0.000115386	5.37936
ENSMUSG00000005667	Mthfd2	2079.96	0.634491	0.11208	5.66106	1.5e-08	8.92e-07	7.82264
ENSMUSG00000021686	Ap3b1	2493.75	-0.27709	0.0992776	-2.79107	0.00525349	0.0300887	2.27955
ENSMUSG00000002257	Def6	2359.22	-0.0311551	0.0943983	-0.330039	0.741371	0.858492	0.129965
ENSMUSG00000046722	Cdc42se1	2990.36	0.187115	0.0927234	2.01799	0.0435924	0.138831	1.36059
ENSMUSG00000042349	Ikbke	3113.33	-1.00123	0.187884	-5.32898	9.88e-08	4.69e-06	7.00539
ENSMUSG00000029478	Ncor2	2865.06	0.180038	0.118338	1.52139	0.128163	0.29154	0.892239
ENSMUSG00000020780	Srp68	1923.64	0.251448	0.125877	1.99757	0.0457629	0.14382	1.33949
ENSMUSG00000071072	Ptges3	2444.8	0.555733	0.168405	3.29997	0.000966949	0.0086749	3.0146
ENSMUSG00000041112	Elmo1	2539.97	0.393243	0.107757	3.64934	0.000262911	0.00323812	3.58019
ENSMUSG00000024525	Impa2	2346.91	-0.302504	0.16414	-1.84296	0.0653344	0.18395	1.18486
ENSMUSG00000049470	Aff4	2573.7	-0.0887155	0.0939814	-0.943969	0.345186	0.553263	0.461947
ENSMUSG00000025007	Aldh18a1	2335.28	0.703856	0.116143	6.06025	1.36e-09	1.04e-07	8.86674
ENSMUSG00000027475	Kif3b	2320.61	-0.193427	0.112825	-1.7144	0.0864544	0.223219	1.06321
ENSMUSG00000032612	Usp4	2651.62	0.13415	0.102944	1.30314	0.192527	0.381052	0.715507
ENSMUSG00000039275	Foxk2	2276.16	0.561511	0.144048	3.89809	9.7e-05	0.00152605	4.01343
ENSMUSG00000069744	Psmb3	2227.25	0.471994	0.130157	3.62633	0.000287474	0.00348149	3.5414
ENSMUSG00000053470	Kdm3a	2267.72	-0.525928	0.14579	-3.60743	0.000309243	0.00367941	3.5097
ENSMUSG00000059456	Ptk2b	1831.57	-0.636176	0.122094	-5.21055	1.88e-07	8.24e-06	6.7252
ENSMUSG00000029204	Rhoh	1914.56	-0.716512	0.171759	-4.17163	3.02e-05	0.000599417	4.51937
ENSMUSG00000031833	Mast3	2763.85	-0.0606756	0.109078	-0.556256	0.578036	0.747765	0.238045
ENSMUSG00000043866	Taf10	2375.64	0.299351	0.134234	2.23007	0.0257431	0.0949482	1.58934
ENSMUSG00000085438	1700020I14Rik	3398.53	-0.362466	0.104949	-3.45374	0.000552871	0.00565582	3.25738
ENSMUSG00000020128	Vps54	2445.14	-0.273105	0.116955	-2.33513	0.0195364	0.0775638	1.70916
ENSMUSG00000029836	Cbx3	2477.06	0.322568	0.113754	2.83566	0.00457317	0.0271097	2.33978
ENSMUSG00000062115	Rai1	3223.62	0.0152493	0.112876	0.135097	0.892535	0.945436	0.0493748
ENSMUSG00000005370	Msh6	2711.37	0.100692	0.10432	0.965222	0.334434	0.5429	0.47569
ENSMUSG00000038708	Golga4	2216.98	-0.0984945	0.0975889	-1.00928	0.312841	0.521852	0.504677
ENSMUSG00000034252	Senp6	2694.8	-0.111625	0.0948736	-1.17657	0.239368	0.439142	0.620934
ENSMUSG00000024387	Csnk2b	2327.63	0.0798517	0.111989	0.713029	0.475828	0.666424	0.32255
ENSMUSG00000020897	Aurkb	2781.08	0.362014	0.110593	3.2734	0.00106262	0.00930593	2.97362
ENSMUSG00000021288	Klc1	2466.51	-0.0663692	0.111299	-0.596314	0.550966	0.726669	0.258876
ENSMUSG00000029050	Ski	2644.71	-0.126786	0.116528	-1.08803	0.276581	0.482574	0.558178
ENSMUSG00000031441	Atp11a	2885.39	0.156829	0.129723	1.20896	0.22668	0.423843	0.644587
ENSMUSG00000029110	Rnf4	2485	0.104685	0.0934585	1.12013	0.262659	0.467313	0.580607
ENSMUSG00000014195	Dnajc7	2599.01	-0.185935	0.132986	-1.39815	0.162067	0.339707	0.790306
ENSMUSG00000058835	Abi1	2000.24	-0.147063	0.113662	-1.29386	0.195713	0.384859	0.708381
ENSMUSG00000021610	Clptm1l	2629.08	0.22806	0.122691	1.85882	0.0630525	0.179302	1.2003
ENSMUSG00000021178	Psmc1	2839.96	0.425828	0.131009	3.25038	0.00115252	0.0098415	2.93835
ENSMUSG00000041846	Ppp4r3a	2348.88	0.0483377	0.10806	0.447324	0.654641	0.802665	0.183997
ENSMUSG00000054405	Dnajc8	2398.78	0.112575	0.0905551	1.24316	0.213807	0.409242	0.669978
ENSMUSG00000026029	Casp8	2831.48	0.433359	0.0942725	4.59688	4.29e-06	0.000117289	5.36767
ENSMUSG00000016256	Ctsz	3461	0.170646	0.179122	0.952682	0.340751	0.549367	0.467563
ENSMUSG00000003037	Rab8a	2568.4	-0.0868956	0.0996696	-0.871836	0.383298	0.587733	0.416463
ENSMUSG00000006519	Cyba	2809.22	0.127743	0.0987497	1.2936	0.195804	0.384938	0.708179
ENSMUSG00000000594	Gm2a	3581.86	-0.526084	0.144799	-3.6332	0.000279928	0.00341421	3.55295
ENSMUSG00000015092	Edf1	2464.82	0.320929	0.142454	2.25286	0.0242678	0.0909317	1.61497
ENSMUSG00000036712	Cyld	2206.21	-0.396049	0.123364	-3.21041	0.00132545	0.0109393	2.87764
ENSMUSG00000029570	Lfng	2882.45	-0.350456	0.104311	-3.35972	0.000780215	0.00732236	3.10779
ENSMUSG00000020496	Rnf187	2994.08	0.24435	0.0981629	2.48923	0.012802	0.0572724	1.89272
ENSMUSG00000040084	Bub1b	2928.99	0.259535	0.108586	2.39014	0.016842	0.0698875	1.77361
ENSMUSG00000020687	Cdc27	2161.23	0.129196	0.0993009	1.30106	0.193238	0.382038	0.713907
ENSMUSG00000067870	Rpl31-ps8	1641.51	0.196256	0.124766	1.57299	0.115721	0.272271	0.936587
ENSMUSG00000028960	Ube4b	2673.26	-0.0753568	0.0929318	-0.810883	0.417433	0.618446	0.379413
ENSMUSG00000042644	Itpr3	2401.87	-0.542974	0.152956	-3.54986	0.000385429	0.00431973	3.41406
ENSMUSG00000019942	Cdk1	2818.6	0.443397	0.123219	3.59844	0.000320126	0.003782	3.49468
ENSMUSG00000043008	Klhl6	1104.16	-1.16617	0.191028	-6.10469	1.03e-09	8e-08	8.98717
ENSMUSG00000026288	Inpp5d	2836.47	-0.0273449	0.0901032	-0.303484	0.761521	0.870582	0.118318
ENSMUSG00000003031	Cdkn1b	2230.58	-1.04154	0.339207	-3.07051	0.00213694	0.0156788	2.67021
ENSMUSG00000027852	Nras	2270.04	0.0977214	0.0970928	1.00647	0.314188	0.522752	0.502811
ENSMUSG00000032393	Dpp8	2862.58	-0.112137	0.0947009	-1.18411	0.236368	0.435685	0.62641
ENSMUSG00000031691	Tnpo2	2751.38	0.316154	0.118089	2.67725	0.007423	0.0386895	2.12942
ENSMUSG00000036270	Edc4	2448.44	0.0704061	0.105223	0.669114	0.503423	0.690122	0.298067
ENSMUSG00000058392	Rrp1b	1695.61	0.345916	0.12516	2.76378	0.00571367	0.032018	2.24308
ENSMUSG00000041483	Zfp281	1885.72	-1.019	0.125508	-8.11906	4.7e-16	1.29e-13	15.3281
ENSMUSG00000038976	Ppp1r9b	2412.48	-0.0925686	0.122972	-0.75276	0.451594	0.645446	0.345252
ENSMUSG00000037197	Rbm17	2337.41	0.255776	0.109079	2.34487	0.0190338	0.0762516	1.72047
ENSMUSG00000029227	Fip1l1	2203.83	0.130932	0.0959344	1.36481	0.172313	0.353281	0.763681
ENSMUSG00000022092	Ppp3cc	1906.06	0.180432	0.126082	1.43107	0.15241	0.325423	0.816987
ENSMUSG00000027810	Eif2a	1907.08	-0.0681308	0.0967131	-0.704463	0.481144	0.67069	0.317725
ENSMUSG00000012535	Tnpo3	2516.31	0.239318	0.108504	2.20562	0.0274104	0.0992269	1.56208
ENSMUSG00000024298	Zfp871	2476.08	-0.220294	0.120715	-1.8249	0.068016	0.189096	1.16739
ENSMUSG00000028214	Gem	200.459	-0.631568	0.235521	-2.68158	0.00732757	0.0383415	2.13504
ENSMUSG00000022551	Cyc1	2655.62	0.439212	0.136854	3.20936	0.00133031	0.010962	2.87605
ENSMUSG00000013858	Tmem259	2545.81	0.07986	0.103369	0.772575	0.439774	0.63645	0.356771
ENSMUSG00000021754	Map3k1	1453.03	-0.522632	0.17813	-2.934	0.00334629	0.021717	2.47544
ENSMUSG00000017715	Pgs1	1718.04	0.574286	0.133842	4.29076	1.78e-05	0.000386472	4.74943
ENSMUSG00000051790	Nlgn2	1491.91	0.160786	0.15711	1.0234	0.30612	0.514974	0.514109
ENSMUSG00000005575	Ube2m	2400.87	0.453329	0.144312	3.14132	0.0016819	0.0130459	2.7742
ENSMUSG00000022812	Gsk3b	1535.04	-0.0508183	0.100438	-0.505968	0.612879	0.772876	0.212625
ENSMUSG00000030733	Sh2b1	2319.2	-0.090561	0.107106	-0.845524	0.397818	0.600608	0.400315
ENSMUSG00000006398	Cdc20	3357.25	0.355724	0.120254	2.95811	0.00309528	0.0205588	2.5093
ENSMUSG00000042323	Pbrm1	2848.42	0.11633	0.0898812	1.29426	0.195575	0.384638	0.708687
ENSMUSG00000017677	Wsb1	1894.54	0.232682	0.118758	1.9593	0.0500779	0.153568	1.30035
ENSMUSG00000024474	Ik	2308.01	0.00978745	0.0905115	0.108135	0.913889	0.956298	0.0391067
ENSMUSG00000039114	Nrn1	2769.75	-1.56486	0.149123	-10.4938	9.23e-26	1.07e-22	25.0349
ENSMUSG00000038845	Phb	2288.6	0.406211	0.152114	2.67044	0.00757527	0.0392387	2.1206
ENSMUSG00000044167	Foxo1	2270.19	-0.827012	0.160814	-5.14266	2.71e-07	1.11e-05	6.56723
ENSMUSG00000018983	E2f2	3035.39	-0.177252	0.115411	-1.53584	0.124578	0.286491	0.904559
ENSMUSG00000030263	Lrmp	2828.15	0.110237	0.100868	1.09288	0.274445	0.48019	0.561545
ENSMUSG00000030759	Far1	2816.62	0.196611	0.1228	1.60106	0.109363	0.262024	0.961128
ENSMUSG00000005625	Psmd4	2131.21	0.326406	0.13356	2.44389	0.0145297	0.062747	1.83774
ENSMUSG00000034116	Vav1	2565.76	-0.0871769	0.0993285	-0.877662	0.380127	0.585413	0.420071
ENSMUSG00000019849	Prep	1797.6	0.177483	0.12757	1.39126	0.164148	0.34265	0.784764
ENSMUSG00000018765	Fxr2	2116.72	0.307234	0.118952	2.58284	0.00979907	0.0475789	2.00882
ENSMUSG00000020608	Smc6	2736.72	-0.101757	0.104512	-0.973637	0.330237	0.539108	0.481175
ENSMUSG00000022387	Brd1	2042.87	-0.00889523	0.112627	-0.0789794	0.937049	0.968822	0.0282377
ENSMUSG00000020257	Wdr82	3183.29	-0.0530517	0.108174	-0.490428	0.623831	0.781532	0.204933
ENSMUSG00000024048	Myl12a	2220.31	0.482449	0.128443	3.75612	0.000172568	0.00236927	3.76304
ENSMUSG00000029191	Rfc1	2648.44	0.170922	0.102619	1.6656	0.0957922	0.239052	1.01867
ENSMUSG00000020463	Ppp4r3b	2372.23	-0.0983772	0.0982254	-1.00155	0.316563	0.524855	0.49954
ENSMUSG00000009073	Nf2	2586.27	0.349454	0.0999248	3.49717	0.000470221	0.00500915	3.3277
ENSMUSG00000004789	Dlst	2438.22	0.267052	0.11249	2.37401	0.0175962	0.0721543	1.75458
ENSMUSG00000020580	Rock2	2615.35	-0.0162853	0.0922831	-0.176471	0.859924	0.928234	0.0655399
ENSMUSG00000024542	Cep192	2672.64	-0.0158154	0.0920151	-0.171879	0.863533	0.93003	0.0637211
ENSMUSG00000040363	Bcor	2728.28	-0.168737	0.0978843	-1.72384	0.0847371	0.219803	1.07193
ENSMUSG00000048307	Ankrd46	1544.78	-0.112478	0.109333	-1.02876	0.303591	0.512241	0.517711
ENSMUSG00000050565	Tor1aip2	2256.83	-0.28266	0.0919145	-3.07525	0.00210327	0.0155149	2.67711
ENSMUSG00000041815	Poldip3	2469.71	0.0385151	0.0901418	0.427273	0.669181	0.812434	0.174457
ENSMUSG00000024098	Twsg1	1358.91	-0.52347	0.122596	-4.26987	1.96e-05	0.000418545	4.70867
ENSMUSG00000084319	Tpt1-ps3	1364.89	-0.318218	0.0999723	-3.18306	0.00145729	0.0117323	2.83645
ENSMUSG00000026420	Il24	873.338	3.25773	0.626212	5.20228	1.97e-07	8.55e-06	6.70584
ENSMUSG00000022439	Parvg	2741.66	0.183066	0.0969593	1.88807	0.0590166	0.171318	1.22903
ENSMUSG00000003360	Ddx23	2357.12	0.167789	0.116378	1.44176	0.149369	0.321008	0.82574
ENSMUSG00000036202	Rif1	2995.98	0.243034	0.111507	2.17955	0.029291	0.104157	1.53327
ENSMUSG00000038056	Kmt2c	2670.52	-0.578806	0.155806	-3.71491	0.000203278	0.0026789	3.69191
ENSMUSG00000042772	Smg7	2388.54	0.00181493	0.105411	0.0172177	0.986263	0.993347	0.0060073
ENSMUSG00000019777	Hdac2	2011.99	0.180961	0.12868	1.40628	0.15964	0.336129	0.796857
ENSMUSG00000060073	Psma3	1921.61	0.474438	0.136618	3.47273	0.000515194	0.00539664	3.28803
ENSMUSG00000031239	Itm2a	2218.3	-0.448962	0.102797	-4.36745	1.26e-05	0.000291762	4.90064
ENSMUSG00000036309	Skp1a	2792.82	-0.0829895	0.0909341	-0.912633	0.361436	0.56818	0.441969
ENSMUSG00000022024	Sugt1	1824.46	0.123989	0.122346	1.01342	0.310858	0.520099	0.507438
ENSMUSG00000054693	Adam10	3126.41	0.00366044	0.0989836	0.0369802	0.970501	0.985903	0.0130041
ENSMUSG00000040354	Mars	2564.28	0.685557	0.156887	4.36975	1.24e-05	0.00028914	4.90523
ENSMUSG00000024122	Pdpk1	2496.66	-0.0154521	0.0915236	-0.168832	0.865929	0.931345	0.0625178
ENSMUSG00000030629	Zfand6	1950.98	-0.406561	0.122282	-3.32478	0.000884868	0.00808784	3.05312
ENSMUSG00000021024	Psma6	2427.73	0.423204	0.120137	3.52268	0.000427212	0.00466649	3.36936
ENSMUSG00000001151	Pcnt	2879.29	0.114532	0.099078	1.15598	0.247691	0.448804	0.606089
ENSMUSG00000040720	Virma	2654.43	-0.124173	0.0935731	-1.32702	0.184502	0.369666	0.734
ENSMUSG00000035890	Rnf126	1955.84	0.330808	0.128423	2.57593	0.00999696	0.0482024	2.00013
ENSMUSG00000028284	Map3k7	2707.66	-0.119152	0.0871001	-1.368	0.171314	0.351902	0.766208
ENSMUSG00000047888	Tnrc6b	2166.85	-0.540925	0.146919	-3.68179	0.000231603	0.00294648	3.63526
ENSMUSG00000033952	Aspm	2945.27	-0.130944	0.105104	-1.24585	0.212818	0.408107	0.671991
ENSMUSG00000063480	Snu13	2558.67	0.476059	0.130742	3.64122	0.000271346	0.00332841	3.56648
ENSMUSG00000053469	Tg	1841.18	0.642114	0.192675	3.33263	0.000860299	0.00791138	3.06535
ENSMUSG00000006442	Srm	2411.99	0.756159	0.173812	4.35044	1.36e-05	0.000311027	4.86689
ENSMUSG00000021366	Hivep1	2593.46	0.0720739	0.118661	0.607393	0.54359	0.721227	0.264729
ENSMUSG00000026790	Odf2	2507.42	0.159437	0.0930287	1.71385	0.0865565	0.223275	1.0627
ENSMUSG00000032212	Sltm	2334.2	0.142947	0.098929	1.44495	0.148473	0.320132	0.828354
ENSMUSG00000020644	Id2	1676.64	0.396733	0.127783	3.10473	0.00190452	0.014387	2.72021
ENSMUSG00000036751	Cox6b1	1999.78	0.200414	0.114475	1.75073	0.0799926	0.211428	1.09695
ENSMUSG00000026483	Fam129a	2222.82	-0.887602	0.103565	-8.57044	1.03e-17	3.79e-15	16.9868
ENSMUSG00000028496	Mllt3	1871.94	-0.235794	0.0965996	-2.44094	0.0146491	0.0631026	1.83419
ENSMUSG00000040128	Pnrc1	1536.65	-0.930395	0.19992	-4.65384	3.26e-06	9.29e-05	5.48705
ENSMUSG00000003068	Stk11	2541.21	0.115272	0.0951683	1.21125	0.2258	0.422864	0.646276
ENSMUSG00000025190	Got1	1675.84	0.355734	0.159847	2.22546	0.0260503	0.0957063	1.58419
ENSMUSG00000039637	Coro7	2923.34	0.233134	0.101956	2.28661	0.0222183	0.0851157	1.65329
ENSMUSG00000035929	H2-Q4	1745.62	0.0167208	0.141364	0.118282	0.905844	0.952257	0.0429466
ENSMUSG00000032253	Phip	2389.39	-0.188304	0.110097	-1.71034	0.0872024	0.22419	1.05947
ENSMUSG00000031299	Pdha1	2141.75	0.141935	0.0961979	1.47545	0.140091	0.308402	0.853589
ENSMUSG00000025066	Sfr1	2045.66	0.105516	0.10571	0.998169	0.318197	0.526241	0.497304
ENSMUSG00000055681	Cope	2083.64	0.0605356	0.101797	0.594671	0.552064	0.727727	0.258011
ENSMUSG00000034566	Atp5h	2119.22	0.107304	0.107918	0.994307	0.320073	0.528127	0.49475
ENSMUSG00000063694	Cycs	2035.88	0.565631	0.175218	3.22816	0.00124589	0.0104029	2.90452
ENSMUSG00000024969	Mark2	2589.11	0.0183404	0.106432	0.17232	0.863186	0.930027	0.0638956
ENSMUSG00000029250	Polr2b	2632.23	0.159111	0.0979101	1.62507	0.104148	0.253233	0.98235
ENSMUSG00000024539	Ptpn2	1180.36	0.25193	0.125357	2.00969	0.0444636	0.140883	1.352
ENSMUSG00000033953	Ppp3r1	2136.29	0.242921	0.119614	2.03088	0.0422667	0.135403	1.374
ENSMUSG00000025580	Eif4a3	2787.34	0.420702	0.121545	3.46128	0.00053762	0.00556387	3.26952
ENSMUSG00000030451	Herc2	2556.84	-0.0621101	0.120209	-0.516686	0.605376	0.766863	0.217975
ENSMUSG00000018008	Cyth4	2837.43	-0.0989854	0.102381	-0.966831	0.333629	0.542419	0.476737
ENSMUSG00000059714	Flot1	649.225	0.037913	0.118202	0.320747	0.748402	0.86292	0.125865
ENSMUSG00000040761	Spen	2271.71	0.0461909	0.106911	0.43205	0.665705	0.810053	0.176718
ENSMUSG00000003131	Pafah1b2	2336.09	0.271294	0.106325	2.55154	0.0107247	0.0506192	1.96961
ENSMUSG00000004837	Grap	2978.11	-0.241069	0.0917827	-2.62652	0.00862622	0.0432258	2.06418
ENSMUSG00000042700	Sipa1l1	1094.98	-0.434061	0.150807	-2.87826	0.00399879	0.0244853	2.39807
ENSMUSG00000032577	Mapkapk3	2904.33	0.169514	0.104477	1.62251	0.104695	0.253948	0.980075
ENSMUSG00000027406	Idh3b	2199.05	0.0697892	0.0921436	0.757396	0.448813	0.643645	0.347935
ENSMUSG00000020790	Ankfy1	2482.54	0.0906512	0.093961	0.964774	0.334658	0.543147	0.475399
ENSMUSG00000038429	Usp5	2602.52	0.333485	0.109238	3.05284	0.00226688	0.0163691	2.64457
ENSMUSG00000027823	Gmps	2405.88	0.367987	0.134062	2.7449	0.00605284	0.0334215	2.21804
ENSMUSG00000091896	Ube2d2a	2343.85	-0.0692182	0.0989687	-0.699395	0.484305	0.673831	0.314881
ENSMUSG00000029152	Ociad1	2189.8	-0.000960887	0.10232	-0.00939104	0.992507	0.996487	0.00326636
ENSMUSG00000102869	2900097C17Rik	2110.16	0.310026	0.10696	2.89853	0.00374914	0.0234426	2.42607
ENSMUSG00000042390	Gatad2b	1928.01	-0.0446974	0.0979418	-0.456367	0.648126	0.798296	0.18834
ENSMUSG00000031540	Kat6a	2459.7	-0.0375227	0.0956837	-0.392154	0.694945	0.830169	0.15805
ENSMUSG00000026980	Ly75	1162.26	-0.217362	0.119913	-1.81267	0.0698832	0.192612	1.15563
ENSMUSG00000006310	Zbtb32	1315.13	-0.283789	0.174095	-1.63008	0.103085	0.251523	0.986803
ENSMUSG00000031060	Rbm10	2295.37	0.253566	0.108084	2.346	0.0189759	0.076081	1.7218
ENSMUSG00000025246	Tbl1x	2467.77	-0.0823229	0.0885104	-0.930093	0.352323	0.559578	0.453059
ENSMUSG00000052488	Cherp	2732.63	0.148196	0.102115	1.45127	0.146706	0.317832	0.833553
ENSMUSG00000001419	Mef2d	2746.94	-0.711562	0.139648	-5.09541	3.48e-07	1.38e-05	6.45844
ENSMUSG00000029063	Nadk	2766	0.103304	0.0948802	1.08878	0.27625	0.482174	0.558697
ENSMUSG00000029422	Rsrc2	1818.37	-0.0896363	0.101143	-0.886236	0.37549	0.581475	0.425401
ENSMUSG00000003868	Ruvbl2	2092.3	0.538054	0.133591	4.02762	5.63e-05	0.000989187	4.24915
ENSMUSG00000075700	Selenot	2580.03	0.219492	0.100834	2.17677	0.0294981	0.104745	1.53021
ENSMUSG00000020198	Ap3d1	2509.35	0.168297	0.103659	1.62356	0.10447	0.25373	0.981008
ENSMUSG00000044894	Uqcrq	1573.12	0.439581	0.177566	2.47559	0.0133017	0.058702	1.87609
ENSMUSG00000037815	Ctnna1	2166.4	-0.0796808	0.119714	-0.665596	0.50567	0.69168	0.296133
ENSMUSG00000015714	Cers2	2303.1	0.24514	0.11013	2.22592	0.0260195	0.0956396	1.5847
ENSMUSG00000074129	Rpl13a	1421.18	0.186264	0.133147	1.39894	0.161831	0.339554	0.790938
ENSMUSG00000061306	Slc38a10	2266.7	0.210636	0.112817	1.86707	0.0618923	0.177106	1.20836
ENSMUSG00000003380	Rabac1	1543.91	-0.244335	0.133321	-1.83268	0.0668497	0.186716	1.1749
ENSMUSG00000040667	Nup88	2500.73	0.27572	0.102099	2.70051	0.00692325	0.036902	2.15969
ENSMUSG00000025503	Taldo1	2300.96	0.422725	0.104137	4.0593	4.92e-05	0.000890029	4.30786
ENSMUSG00000032330	Cox7a2	1799.71	0.272351	0.134463	2.02548	0.0428184	0.136879	1.36837
ENSMUSG00000037706	Cd81	1800.65	0.0959951	0.125619	0.764178	0.444761	0.64036	0.351873
ENSMUSG00000026554	Dcaf8	2720.02	-0.518615	0.12016	-4.31605	1.59e-05	0.000355529	4.79902
ENSMUSG00000020271	Fbxw11	1949.6	-0.0491793	0.108816	-0.451949	0.651306	0.800606	0.186215
ENSMUSG00000079197	Psme2	2377.64	0.151783	0.126318	1.2016	0.22952	0.427448	0.639179
ENSMUSG00000036990	Otud4	2478.2	0.0122534	0.108744	0.112681	0.910283	0.954376	0.0408235
ENSMUSG00000020101	Vsir	1782.12	-0.787161	0.187719	-4.1933	2.75e-05	0.000558118	4.56078
ENSMUSG00000028330	Ncbp1	2484.01	0.234234	0.11532	2.03116	0.0422389	0.135342	1.37429
ENSMUSG00000028381	Ugcg	2147.84	-0.89113	0.164075	-5.43125	5.6e-08	2.84e-06	7.25211
ENSMUSG00000032216	Nedd4	1819.47	-0.0508428	0.111048	-0.457844	0.647064	0.797569	0.189053
ENSMUSG00000034297	Med13	1776.72	-0.142511	0.118551	-1.20211	0.229319	0.427291	0.63956
ENSMUSG00000024271	Elp2	2566.98	0.383092	0.101206	3.78528	0.000153535	0.00215737	3.81379
ENSMUSG00000003099	Ppp5c	2711.83	0.359914	0.132898	2.7082	0.00676499	0.0363025	2.16973
ENSMUSG00000038965	Ube2l3	2639.19	0.164417	0.0929877	1.76816	0.0770337	0.206176	1.11332
ENSMUSG00000020262	Adarb1	1434.91	0.167662	0.147246	1.13865	0.254849	0.456978	0.593717
ENSMUSG00000000171	Sdhd	1984.81	0.294853	0.123667	2.38424	0.0171143	0.0706805	1.76664
ENSMUSG00000009907	Vps4b	2091.81	-0.13342	0.093091	-1.43322	0.151796	0.324511	0.818739
ENSMUSG00000026421	Csrp1	2845.12	0.143815	0.0896543	1.6041	0.108692	0.260912	0.963803
ENSMUSG00000040407	Akap9	2013.79	-0.350477	0.102055	-3.4342	0.000594314	0.00597209	3.22598
ENSMUSG00000036768	Kif15	2936.99	0.217757	0.0983041	2.21513	0.026751	0.0975969	1.57266
ENSMUSG00000071655	Ubxn1	2117.47	0.0713837	0.111968	0.637536	0.523776	0.705566	0.280854
ENSMUSG00000027533	Fabp5	2532.66	0.55374	0.177361	3.12211	0.0017956	0.0137225	2.74579
ENSMUSG00000042404	Dennd4b	2258.53	-0.132231	0.115297	-1.14687	0.251436	0.45309	0.599573
ENSMUSG00000026021	Sumo1	2333.93	0.0684016	0.109859	0.622629	0.533528	0.713851	0.272843
ENSMUSG00000072501	Phf20l1	2573.5	-0.371468	0.130079	-2.85572	0.00429396	0.0258616	2.36714
ENSMUSG00000034290	Nek9	2497.37	-0.0212009	0.0935728	-0.226571	0.820757	0.90552	0.0857852
ENSMUSG00000025544	Tm9sf2	2432.3	0.0862935	0.107111	0.805648	0.420446	0.620535	0.37629
ENSMUSG00000059263	Usp47	2089.9	-0.0759615	0.0929274	-0.817428	0.413684	0.615014	0.383331
ENSMUSG00000051735	Rinl	2595.63	-0.130965	0.109212	-1.19918	0.230456	0.428669	0.637412
ENSMUSG00000005873	Reep5	2777.14	0.00255876	0.122156	0.0209467	0.983288	0.991383	0.0073192
ENSMUSG00000029174	Tbc1d1	1999.4	0.133488	0.0908128	1.46992	0.141583	0.310702	0.84899
ENSMUSG00000032745	Gpbp1	2268.04	0.0245857	0.110181	0.223138	0.823428	0.906872	0.0843745
ENSMUSG00000032020	Ubash3b	2383.74	-0.463752	0.113288	-4.09356	4.25e-05	0.000785997	4.37181
ENSMUSG00000020235	Fzr1	2626.42	0.150232	0.109132	1.37661	0.168633	0.348486	0.773058
ENSMUSG00000036180	Gatad2a	2607.74	0.275274	0.109038	2.52456	0.0115843	0.0534768	1.93613
ENSMUSG00000028849	Map7d1	2540.49	-0.0958786	0.125891	-0.7616	0.446299	0.641286	0.350374
ENSMUSG00000026014	Raph1	1581.32	-0.0573165	0.127125	-0.450867	0.652086	0.801054	0.185695
ENSMUSG00000052738	Suclg1	1462.47	0.218152	0.125875	1.73309	0.0830801	0.216886	1.0805
ENSMUSG00000020661	Dnmt3a	3073.38	-0.171738	0.100924	-1.70166	0.0888185	0.227259	1.0515
ENSMUSG00000031848	Lsm4	1910.87	0.355454	0.141979	2.50357	0.0122946	0.0554971	1.91028
ENSMUSG00000024571	Gm16286	2227.65	0.189942	0.111951	1.69666	0.0897604	0.229124	1.04692
ENSMUSG00000032349	Elovl5	2246.57	-0.128805	0.12873	-1.00059	0.317026	0.525285	0.498905
ENSMUSG00000022867	Usp25	2961.25	0.18527	0.0892646	2.07551	0.0379388	0.125764	1.42092
ENSMUSG00000064127	Med14	3287.4	-0.0860242	0.100379	-0.856994	0.391448	0.594573	0.407326
ENSMUSG00000108414	Snhg1	1608.71	0.383722	0.149855	2.56062	0.0104484	0.0497414	1.98095
ENSMUSG00000018286	Psmb6	2197.07	0.366277	0.144096	2.54189	0.0110256	0.0516126	1.9576
ENSMUSG00000056612	Ppp1r14b	2630	0.462899	0.14951	3.09611	0.00196079	0.0147016	2.70757
ENSMUSG00000019979	Apaf1	1573.06	-0.17297	0.111876	-1.54608	0.122086	0.282456	0.913335
ENSMUSG00000078619	Smarcd2	2759.27	0.135857	0.0879736	1.54429	0.122518	0.283095	0.911799
ENSMUSG00000024063	Lbh	2149.71	-0.847377	0.200753	-4.22099	2.43e-05	0.00050397	4.61397
ENSMUSG00000066551	Hmgb1	2838.77	0.382781	0.109604	3.49241	0.000478688	0.00507066	3.31995
ENSMUSG00000028180	Zranb2	2237.88	0.0805591	0.102533	0.785688	0.43205	0.630007	0.364466
ENSMUSG00000027109	Sp3	2341.2	-0.29172	0.102931	-2.83412	0.00459523	0.0272083	2.33769
ENSMUSG00000056770	Setd3	2299.97	0.0850276	0.0892764	0.952408	0.34089	0.549532	0.467386
ENSMUSG00000024870	Rab1b	2398.44	0.258464	0.100139	2.58106	0.00984984	0.0477676	2.00657
ENSMUSG00000035027	Map2k2	2356.53	0.319418	0.133882	2.38582	0.0170412	0.070447	1.7685
ENSMUSG00000022365	Derl1	1753.89	0.152704	0.114592	1.33259	0.182666	0.367062	0.738343
ENSMUSG00000008036	Ap2s1	2420.85	0.239026	0.106858	2.23686	0.0252954	0.0938064	1.59696
ENSMUSG00000070544	Top1	2583.64	0.409528	0.122137	3.35302	0.000799346	0.00748325	3.09727
ENSMUSG00000021326	Trim27	2309.28	0.215587	0.110399	1.95279	0.0508448	0.155255	1.29375
ENSMUSG00000032579	Hemk1	2397.54	0.470758	0.122245	3.85095	0.000117661	0.00175651	3.92937
ENSMUSG00000021171	Esyt2	2203.73	-0.383776	0.131754	-2.91281	0.00358193	0.022784	2.44588
ENSMUSG00000038909	Kat7	2128.18	0.00444572	0.101528	0.0437881	0.965073	0.983427	0.0154397
ENSMUSG00000024844	Banf1	2171.22	0.358235	0.154043	2.32555	0.0200424	0.0789896	1.69805
ENSMUSG00000021127	Zfp36l1	2945.04	-0.856715	0.142283	-6.02119	1.73e-09	1.3e-07	8.76161
ENSMUSG00000037674	Rfx7	2416.14	-0.172942	0.113519	-1.52346	0.127644	0.29099	0.894
ENSMUSG00000028577	Plaa	1978.79	0.247056	0.118529	2.08435	0.037128	0.123894	1.4303
ENSMUSG00000006589	Aprt	2243.46	0.407644	0.159101	2.56217	0.010402	0.0496311	1.98288
ENSMUSG00000074781	Ube2n	2544.75	0.303368	0.130272	2.32872	0.0198738	0.0785992	1.70172
ENSMUSG00000014959	Gorasp2	1828.22	0.338305	0.130981	2.58285	0.00979882	0.0475789	2.00883
ENSMUSG00000035851	Ythdc1	1813.2	-0.258748	0.100127	-2.58419	0.00976075	0.0474737	2.01052
ENSMUSG00000021149	Gtpbp4	2367.3	0.318824	0.153246	2.08047	0.0374829	0.124637	1.42617
ENSMUSG00000038773	Kdm3b	2559.93	-0.363626	0.123888	-2.93512	0.00333423	0.0216855	2.477
ENSMUSG00000029048	Rer1	2024.49	0.26788	0.113302	2.36431	0.0180638	0.0734398	1.74319
ENSMUSG00000015880	Ncapg	2381.33	0.206035	0.113787	1.8107	0.0701868	0.193112	1.15374
ENSMUSG00000042492	Tbc1d10b	2214.87	0.21554	0.108147	1.99303	0.0462584	0.145014	1.33481
ENSMUSG00000015341	Golga7	1495.95	-0.123515	0.108449	-1.13892	0.254736	0.45695	0.593909
ENSMUSG00000066037	Hnrnpr	2765.88	0.193054	0.0987007	1.95596	0.0504703	0.154268	1.29696
ENSMUSG00000030067	Foxp1	2455.67	-1.22155	0.157406	-7.7605	8.46e-15	1.72e-12	14.0726
ENSMUSG00000027367	Stard7	2331.61	0.230301	0.113748	2.02465	0.0429029	0.137091	1.36751
ENSMUSG00000027804	Ppid	2592.89	0.394894	0.129078	3.05934	0.00221826	0.0161263	2.65399
ENSMUSG00000033671	Cep350	2222.56	-0.270041	0.120067	-2.24908	0.0245075	0.0914547	1.6107
ENSMUSG00000039703	Nploc4	2290.9	0.387938	0.120822	3.21081	0.00132361	0.0109307	2.87824
ENSMUSG00000026878	Rab14	2183.87	0.0716522	0.0933458	0.7676	0.442725	0.638716	0.353866
ENSMUSG00000038611	Phrf1	2521.83	0.189136	0.0983032	1.92401	0.0543534	0.162124	1.26477
ENSMUSG00000028837	Psmb2	2186.71	0.237769	0.119479	1.99006	0.0465846	0.145552	1.33176
ENSMUSG00000056493	Foxk1	2541.11	-0.168751	0.0928866	-1.81675	0.0692559	0.191343	1.15954
ENSMUSG00000023952	Gtpbp2	2349.69	-0.29652	0.119403	-2.48335	0.0130152	0.0579168	1.88555
ENSMUSG00000024012	Mtch1	2560.37	0.304138	0.0982119	3.09675	0.00195654	0.0146909	2.70851
ENSMUSG00000061613	U2af1	2361.95	0.259329	0.131951	1.96534	0.0493749	0.151845	1.30649
ENSMUSG00000020330	Hmmr	2348.07	0.288948	0.102525	2.81831	0.00482776	0.0283069	2.31625
ENSMUSG00000047036	Zfp445	2824.54	-0.120357	0.0996154	-1.20821	0.226966	0.424272	0.64404
ENSMUSG00000024943	Smc5	1806.52	0.148895	0.0964135	1.54434	0.122506	0.283095	0.911844
ENSMUSG00000028894	Inpp5b	2787.54	0.289439	0.133833	2.16269	0.030565	0.10757	1.51478
ENSMUSG00000021012	Zc3h14	2160.74	-0.0642819	0.0965662	-0.665677	0.505617	0.69168	0.296178
ENSMUSG00000039232	Stx11	2221.4	-0.28723	0.142936	-2.0095	0.0444843	0.140918	1.35179
ENSMUSG00000096727	Psmb9	1958.88	0.305947	0.112238	2.72588	0.00641296	0.0349741	2.19294
ENSMUSG00000031862	Atp13a1	2559.44	0.167536	0.107507	1.55837	0.119147	0.277689	0.923918
ENSMUSG00000030921	Trim30a	3058.83	0.100195	0.10818	0.926189	0.354348	0.560966	0.45057
ENSMUSG00000006782	Cnp	2401.8	-0.315895	0.154052	-2.05057	0.0403084	0.130911	1.3946
ENSMUSG00000019254	Ppp1r12c	2179.72	0.157708	0.0939413	1.67879	0.0931922	0.234938	1.03062
ENSMUSG00000026914	Psmd14	1974.94	0.366829	0.127792	2.87051	0.00409806	0.0249612	2.38742
ENSMUSG00000034022	Cpsf1	2490.42	0.128316	0.105586	1.21528	0.224259	0.420988	0.64925
ENSMUSG00000022100	Xpo7	2428.62	0.146119	0.0992578	1.47211	0.14099	0.309673	0.850811
ENSMUSG00000038412	Higd1a	1251.05	0.390075	0.170092	2.29331	0.0218301	0.0840129	1.66094
ENSMUSG00000037791	Phf12	2133.37	-0.0359898	0.0982096	-0.36646	0.714022	0.84216	0.146288
ENSMUSG00000031246	Sh3bgrl	3820.62	-0.169702	0.138399	-1.22618	0.220129	0.416696	0.657322
ENSMUSG00000067194	Eif1ax	2234.89	0.318585	0.123485	2.57995	0.00988136	0.0478441	2.00518
ENSMUSG00000063200	Nol7	2273.62	0.2765	0.138981	1.98949	0.0466473	0.145717	1.33117
ENSMUSG00000040681	Hmgn1	1866.51	0.0922403	0.155976	0.591374	0.55427	0.729933	0.256279
ENSMUSG00000043733	Ptpn11	2365.11	0.23706	0.110278	2.14966	0.0315818	0.110119	1.50056
ENSMUSG00000041607	Mbp	2987.25	-0.197153	0.111104	-1.7745	0.0759809	0.204484	1.1193
ENSMUSG00000028954	Nub1	1671.08	-0.231166	0.106862	-2.16322	0.0305246	0.107478	1.51535
ENSMUSG00000037313	Tacc3	2703.36	0.39608	0.105065	3.76986	0.000163337	0.00227599	3.78692
ENSMUSG00000029772	Ahcyl2	3149.15	0.471261	0.102037	4.61855	3.86e-06	0.000108194	5.41292
ENSMUSG00000002981	Clptm1	2225.73	0.252726	0.105715	2.39063	0.0168195	0.0698132	1.77419
ENSMUSG00000006024	Napa	2133.43	0.112184	0.0931249	1.20466	0.228335	0.425985	0.641428
ENSMUSG00000029131	Dnajb6	1926.35	0.191198	0.100981	1.89341	0.0583033	0.170066	1.23431
ENSMUSG00000031754	Nudt21	1729.17	0.145715	0.0968616	1.50437	0.132487	0.297422	0.877826
ENSMUSG00000004626	Stxbp2	2334.38	-0.0916331	0.105209	-0.870966	0.383773	0.587955	0.415926
ENSMUSG00000022890	Atp5j	2139.78	0.19743	0.1141	1.73032	0.083573	0.217533	1.07793
ENSMUSG00000036499	Eea1	2354.23	0.249331	0.129018	1.93253	0.0532942	0.159936	1.27332
ENSMUSG00000041852	Tcf20	2111.48	-0.120252	0.0931615	-1.29079	0.196777	0.386346	0.706027
ENSMUSG00000001127	Araf	2318.47	-0.115822	0.0996612	-1.16216	0.245171	0.445649	0.610531
ENSMUSG00000020189	Osbpl8	1906.87	-0.0898038	0.0982675	-0.913871	0.360784	0.567571	0.442752
ENSMUSG00000041890	Git2	2304.85	-0.446277	0.131404	-3.39622	0.000683223	0.00660976	3.16544
ENSMUSG00000028334	Nans	2045.84	0.357641	0.146682	2.4382	0.0147606	0.0633805	1.8309
ENSMUSG00000022052	Ppp2r2a	1810.69	0.107949	0.0994067	1.08593	0.277511	0.483645	0.55672
ENSMUSG00000032594	Ip6k1	1912.48	-0.674447	0.146328	-4.60916	4.04e-06	0.000112155	5.39329
ENSMUSG00000030138	Bms1	2347.92	0.351791	0.126247	2.78654	0.00532747	0.0304084	2.27348
ENSMUSG00000040383	Aqr	2308.35	0.0661323	0.0978001	0.676199	0.498914	0.686127	0.301974
ENSMUSG00000050965	Prkca	2900.72	-0.12481	0.0944433	-1.32154	0.186322	0.372374	0.729736
ENSMUSG00000028042	Zbtb7b	2710.11	-0.248838	0.104778	-2.37491	0.0175532	0.072025	1.75564
ENSMUSG00000052298	Cdc42se2	2635.94	-0.606577	0.151415	-4.00605	6.17e-05	0.00106291	4.20941
ENSMUSG00000031865	Dctn1	2610.46	-0.00903484	0.0944201	-0.0956877	0.923769	0.961559	0.0344368
ENSMUSG00000027680	Fxr1	1696.28	-0.0249499	0.100168	-0.24908	0.803299	0.894779	0.0951227
ENSMUSG00000038975	Rabggtb	1452.04	0.291895	0.162155	1.8001	0.0718452	0.196196	1.1436
ENSMUSG00000035297	Cops4	1520.22	0.220788	0.112499	1.96258	0.0496949	0.152566	1.30369
ENSMUSG00000032560	Dnajc13	2299.09	0.0421035	0.0939627	0.448088	0.65409	0.802377	0.184363
ENSMUSG00000031527	Eri1	1885.64	0.114139	0.117738	0.969438	0.332327	0.541055	0.478435
ENSMUSG00000037544	Dlgap5	2295.87	0.289881	0.10768	2.69205	0.00710139	0.037573	2.14866
ENSMUSG00000041390	Mdfic	1591.7	-0.0263769	0.105662	-0.249634	0.802871	0.894407	0.0953545
ENSMUSG00000040459	Arglu1	2567.85	0.0964123	0.1011	0.953632	0.34027	0.549003	0.468176
ENSMUSG00000025001	Hells	2614.85	0.449997	0.139544	3.22476	0.0012608	0.0104983	2.89935
ENSMUSG00000053931	Cnn3	621.803	0.21411	0.156227	1.3705	0.170531	0.350814	0.768197
ENSMUSG00000006673	Qrich1	2285.6	0.0620793	0.0954993	0.650049	0.51566	0.699792	0.287636
ENSMUSG00000030102	Itpr1	2726.72	0.529536	0.139863	3.78611	0.000153024	0.00215219	3.81524
ENSMUSG00000058290	Espl1	3040.77	0.289379	0.107789	2.68467	0.00726012	0.0381299	2.13906
ENSMUSG00000031103	Elf4	2567.95	-0.195792	0.119031	-1.64489	0.0999931	0.24607	1.00003
ENSMUSG00000042410	Agps	2139.9	0.276629	0.107154	2.5816	0.00983432	0.0477083	2.00726
ENSMUSG00000014226	Cacybp	2359.06	0.411836	0.143252	2.87491	0.00404142	0.0247262	2.39347
ENSMUSG00000061479	Snrpa	2156.63	0.437242	0.118397	3.69303	0.000221599	0.00286382	3.65443
ENSMUSG00000038538	Ubn2	1976.2	-0.400403	0.112715	-3.55236	0.000381786	0.0043013	3.41818
ENSMUSG00000009555	Cdk9	2298.9	0.0975068	0.109388	0.891387	0.372721	0.578496	0.428616
ENSMUSG00000038037	Socs1	3335.85	0.808912	0.165228	4.89573	9.79e-07	3.37e-05	6.00902
ENSMUSG00000061755	Bod1l	2345.34	-0.232332	0.0916272	-2.53563	0.0112247	0.0522489	1.94983
ENSMUSG00000078429	Ctdsp2	2082.45	-0.715647	0.169647	-4.21846	2.46e-05	0.00050826	4.6091
ENSMUSG00000079139	Gm4204	1860.19	0.349987	0.121088	2.89036	0.00384802	0.0239021	2.41476
ENSMUSG00000020721	Helz	2142.5	-0.228695	0.105318	-2.17146	0.0298962	0.10586	1.52438
ENSMUSG00000050244	Heatr1	2245.15	0.478808	0.146874	3.26	0.00111413	0.00961178	2.95306
ENSMUSG00000024927	Rela	1914.8	-0.267772	0.0982705	-2.72484	0.00643322	0.0350426	2.19157
ENSMUSG00000029623	Pdap1	2152.79	0.603405	0.14513	4.15768	3.22e-05	0.000628815	4.49282
ENSMUSG00000028416	Bag1	2200.87	0.254857	0.118106	2.15787	0.030938	0.108452	1.50951
ENSMUSG00000020483	Dynll2	2990.15	0.590812	0.160686	3.6768	0.000236178	0.00299492	3.62676
ENSMUSG00000029475	Kdm2b	2320.04	0.16791	0.113997	1.47294	0.140767	0.309363	0.851499
ENSMUSG00000035248	Zcchc6	2008.21	-0.266193	0.104874	-2.53821	0.011142	0.0519441	1.95304
ENSMUSG00000004268	Emg1	2004.55	0.311968	0.125522	2.48536	0.0129421	0.0576425	1.88799
ENSMUSG00000059005	Hnrnpa3	2063.63	-0.0339169	0.109065	-0.310979	0.755816	0.867616	0.121584
ENSMUSG00000074578	Zfas1	1253.23	0.0866194	0.119492	0.724895	0.468516	0.660522	0.329275
ENSMUSG00000041355	Ssr2	1805.56	0.213717	0.124767	1.71293	0.0867262	0.223429	1.06185
ENSMUSG00000052533	Nup188	2289.36	0.287605	0.12433	2.31324	0.0207093	0.0807791	1.68384
ENSMUSG00000039067	Psmd7	2347.86	0.395543	0.139273	2.84006	0.00451055	0.0268547	2.34577
ENSMUSG00000035401	Emsy	2020.23	-0.156071	0.103256	-1.51149	0.130663	0.294859	0.883846
ENSMUSG00000032582	Rbm6	1680.35	0.0268614	0.0986424	0.272311	0.785383	0.884452	0.104919
ENSMUSG00000079562	Maea	1940.99	0.188502	0.107583	1.75216	0.0797468	0.211075	1.09829
ENSMUSG00000022789	Dnm1l	2126.69	0.00804694	0.104368	0.0771017	0.938543	0.969767	0.027546
ENSMUSG00000096472	Cdkn2d	1198.35	0.181614	0.127349	1.42611	0.153835	0.32743	0.812944
ENSMUSG00000029394	Cdk2ap1	2342.89	0.58381	0.135825	4.29824	1.72e-05	0.000376507	4.76406
ENSMUSG00000024095	Hnrnpll	3166.13	0.429909	0.112006	3.83828	0.0001239	0.00181846	3.90693
ENSMUSG00000070319	Eif3g	2058.67	0.398141	0.14586	2.72961	0.0063409	0.0346941	2.19785
ENSMUSG00000014077	Chp1	2004.22	-0.0200144	0.0961361	-0.208188	0.835082	0.914825	0.0782707
ENSMUSG00000025410	Dctn2	1976.32	0.147727	0.101421	1.45658	0.145234	0.315849	0.837933
ENSMUSG00000059895	Ptp4a3	2002.23	-0.0412735	0.106878	-0.386173	0.699369	0.832379	0.155294
ENSMUSG00000057036	Gm7536	1436.6	0.0255209	0.114082	0.223706	0.822986	0.906585	0.0846074
ENSMUSG00000041328	Pcf11	1858.75	-0.241993	0.097847	-2.47318	0.0133918	0.0589137	1.87316
ENSMUSG00000020859	Spag9	1661.5	-0.147176	0.100612	-1.4628	0.143521	0.313753	0.843084
ENSMUSG00000031447	Lamp1	2398.25	-0.0932781	0.1016	-0.918096	0.358568	0.5656	0.445428
ENSMUSG00000026965	Anapc2	2306.68	0.0285492	0.096872	0.29471	0.768215	0.874125	0.114517
ENSMUSG00000021273	Fdft1	1506.98	0.529054	0.14232	3.71736	0.000201317	0.00266144	3.69612
ENSMUSG00000024096	Ralbp1	2167.3	-0.0749172	0.0950212	-0.788426	0.430447	0.628678	0.36608
ENSMUSG00000004612	Nkg7	265	-0.638959	0.224668	-2.84401	0.00445497	0.0265869	2.35115
ENSMUSG00000042535	Gtpbp1	2634.05	0.11857	0.0977585	1.21288	0.225174	0.422338	0.647482
ENSMUSG00000026701	Prdx6	1910.49	-0.255425	0.0943924	-2.70599	0.00681013	0.0364668	2.16684
ENSMUSG00000040865	Ino80d	2127.44	-0.195364	0.10288	-1.89895	0.0575708	0.168619	1.2398
ENSMUSG00000056537	Rlim	1796.99	0.109693	0.110148	0.995865	0.319316	0.52728	0.49578
ENSMUSG00000041219	Arhgap11a	2504.6	0.241055	0.0944069	2.55336	0.0106689	0.0504412	1.97188
ENSMUSG00000050608	Minos1	1569.88	0.248864	0.139966	1.77804	0.0753978	0.203424	1.12264
ENSMUSG00000017478	Zc3h18	2379.11	0.405588	0.109986	3.68764	0.000226342	0.00290407	3.64524
ENSMUSG00000022962	Gart	2701.57	0.518096	0.144352	3.58911	0.000331807	0.00388647	3.47911
ENSMUSG00000035203	Epn1	2217	0.0878874	0.101328	0.867351	0.38575	0.589494	0.413695
ENSMUSG00000031604	Msmo1	1346.78	0.677573	0.137825	4.91618	8.82e-07	3.08e-05	6.05429
ENSMUSG00000024006	Stk38	2816.36	-0.519836	0.171318	-3.03435	0.00241059	0.0171519	2.61788
ENSMUSG00000023991	Foxp4	2240.34	-0.068571	0.117938	-0.581414	0.560962	0.73521	0.251067
ENSMUSG00000019951	Uhrf1bp1l	1614.2	0.0145376	0.101035	0.143886	0.88559	0.941666	0.0527672
ENSMUSG00000021819	Zswim8	2126.16	-0.155348	0.0940073	-1.65251	0.0984311	0.243273	1.00687
ENSMUSG00000031490	Eif4ebp1	919.116	0.534789	0.12812	4.17414	2.99e-05	0.000595977	4.52416
ENSMUSG00000032724	Abtb2	1300.17	0.509804	0.156804	3.25122	0.00114912	0.00982699	2.93963
ENSMUSG00000042029	Ncapg2	2680.26	0.336438	0.101521	3.31397	0.00091981	0.00833138	3.0363
ENSMUSG00000025487	Psmd13	2139.17	0.325512	0.141318	2.3034	0.0212563	0.0824153	1.67251
ENSMUSG00000056999	Ide	1986.7	0.172462	0.130358	1.32299	0.185837	0.371683	0.730867
ENSMUSG00000005034	Prkacb	2697.15	-0.171549	0.141047	-1.21626	0.223888	0.420899	0.64997
ENSMUSG00000040028	Elavl1	2262.29	0.373239	0.116235	3.21106	0.00132247	0.0109272	2.87862
ENSMUSG00000020982	Nemf	1772.11	-0.0295114	0.101751	-0.290034	0.77179	0.87594	0.112501
ENSMUSG00000002222	Rmnd5a	2419.9	-0.528631	0.109125	-4.84427	1.27e-06	4.23e-05	5.89592
ENSMUSG00000039176	Polg	2215.09	0.060232	0.0931454	0.646645	0.517862	0.701173	0.285786
ENSMUSG00000026202	Tuba4a	3091.23	0.592133	0.134727	4.39507	1.11e-05	0.000261859	4.9557
ENSMUSG00000050310	Rictor	1612.56	-0.683052	0.163365	-4.18113	2.9e-05	0.000582573	4.5375
ENSMUSG00000022564	Grina	1548.69	-0.593879	0.135184	-4.39311	1.12e-05	0.000263821	4.95178
ENSMUSG00000037318	Traf3ip3	2598.49	-1.06734	0.194191	-5.49633	3.88e-08	2.06e-06	7.41142
ENSMUSG00000025134	Alyref	2423.76	0.537899	0.135442	3.97144	7.14e-05	0.00119434	4.14606
ENSMUSG00000055723	Rras2	1696.61	0.143215	0.124603	1.14937	0.250403	0.452148	0.601361
ENSMUSG00000034525	Ice1	1985.07	-0.170498	0.108636	-1.56944	0.116545	0.273846	0.933505
ENSMUSG00000020124	Usp15	1695.11	0.177971	0.10605	1.67818	0.0933122	0.235122	1.03006
ENSMUSG00000032902	Slc16a1	1758.05	0.385982	0.126308	3.05587	0.00224405	0.0162354	2.64897
ENSMUSG00000021814	Anxa7	1800.59	0.0394447	0.097812	0.40327	0.686749	0.824949	0.163202
ENSMUSG00000028277	Ube2j1	2232.21	-0.0660155	0.0916958	-0.71994	0.471562	0.663108	0.326461
ENSMUSG00000026393	Nek7	2452.73	-0.175962	0.0984146	-1.78797	0.0737809	0.200462	1.13206
ENSMUSG00000024493	Lars	1963.06	0.498154	0.135661	3.67204	0.000240618	0.00303299	3.61867
ENSMUSG00000005981	Trap1	2089.21	0.155993	0.118311	1.3185	0.187336	0.373723	0.727378
ENSMUSG00000094410	Gm38394	1621.49	-0.393689	0.102738	-3.83197	0.000127123	0.00185061	3.89578
ENSMUSG00000035024	Ncapd3	2401.13	0.097755	0.110318	0.886119	0.375553	0.581513	0.425328
ENSMUSG00000027660	Skil	2221.87	-0.130756	0.0936242	-1.3966	0.162532	0.34022	0.78906
ENSMUSG00000016252	Atp5e	1725.88	0.393399	0.14373	2.73708	0.00619878	0.0340526	2.20769
ENSMUSG00000050357	Carmil2	2808.35	-0.318528	0.133501	-2.38596	0.0170347	0.070447	1.76867
ENSMUSG00000034602	Mon2	1932.49	-0.211367	0.0984595	-2.14674	0.0318141	0.110571	1.49738
ENSMUSG00000032316	Clk3	1553.42	0.127811	0.0974735	1.31124	0.189777	0.377026	0.721757
ENSMUSG00000030298	Sec13	1830.09	0.501441	0.150135	3.33993	0.000838009	0.00776796	3.07675
ENSMUSG00000016028	Celsr1	1658.4	0.622979	0.104522	5.96026	2.52e-09	1.8e-07	8.59889
ENSMUSG00000009090	Ap1b1	1901.15	-0.00177691	0.0974057	-0.0182423	0.985446	0.992828	0.00636737
ENSMUSG00000030835	Nomo1	2150.99	0.458008	0.142021	3.22494	0.00126	0.0104983	2.89963
ENSMUSG00000025159	Mms19	1929.14	-0.106713	0.109556	-0.974051	0.330031	0.53889	0.481445
ENSMUSG00000056724	Nbeal2	2409.84	0.0379162	0.135871	0.279059	0.780199	0.881437	0.107794
ENSMUSG00000031112	Stk26	1331.81	-0.0381192	0.108239	-0.352177	0.724706	0.848853	0.139838
ENSMUSG00000028953	Abcf2	2700.3	0.36631	0.146471	2.50091	0.0123876	0.0557855	1.90701
ENSMUSG00000015087	Rabl6	2126.38	0.198959	0.0977861	2.03463	0.041888	0.134614	1.37791
ENSMUSG00000038615	Nfe2l1	1902.59	0.288683	0.128187	2.25204	0.0243195	0.0910577	1.61404
ENSMUSG00000021987	Mtmr6	1548.84	-0.341561	0.10396	-3.2855	0.00101801	0.0090149	2.99225
ENSMUSG00000063888	Rpl7l1	2332.73	0.294791	0.138013	2.13597	0.0326822	0.112807	1.48569
ENSMUSG00000042572	Ube2q1	2206.35	0.0229302	0.089524	0.256135	0.797847	0.891408	0.0980806
ENSMUSG00000015316	Slamf1	1188.92	0.400732	0.110506	3.62635	0.000287456	0.00348149	3.54143
ENSMUSG00000030619	Eed	1467.51	0.185575	0.116087	1.59858	0.109914	0.263091	0.958948
ENSMUSG00000054874	Pcnx3	2279.36	-0.0664478	0.102274	-0.6497	0.515886	0.699836	0.287446
ENSMUSG00000019802	Sec63	1614.26	-0.064454	0.0995014	-0.64777	0.517134	0.700703	0.286397
ENSMUSG00000037486	Asxl2	1727.61	-0.121907	0.121272	-1.00523	0.314787	0.523013	0.501984
ENSMUSG00000041187	Prkd2	2634.69	-0.703721	0.181729	-3.87236	0.000107785	0.00165501	3.96744
ENSMUSG00000029322	Plac8	50.9128	0.636939	0.308439	2.06504	0.0389194	0.128001	1.40983
ENSMUSG00000020741	Cluh	2676.24	0.421008	0.163011	2.58271	0.0098029	0.0475789	2.00865
ENSMUSG00000024038	Ndufv3	1551.81	-0.00204204	0.145853	-0.0140006	0.988829	0.994441	0.0048786
ENSMUSG00000027665	Pik3ca	1800.84	-0.0940006	0.093476	-1.00561	0.314602	0.522879	0.502238
ENSMUSG00000045092	S1pr1	2006.35	-0.830973	0.199237	-4.17079	3.04e-05	0.000600049	4.51777
ENSMUSG00000026511	Srp9	1643.59	0.225096	0.101016	2.22832	0.0258591	0.0952514	1.58739
ENSMUSG00000029414	Kntc1	2780.81	0.167956	0.103535	1.62221	0.104758	0.254019	0.979814
ENSMUSG00000047459	Dynlrb1	2202.97	0.159139	0.121515	1.30962	0.190323	0.377862	0.720508
ENSMUSG00000061288	Taok3	1787.85	0.0159878	0.0972015	0.164481	0.869352	0.93321	0.0608042
ENSMUSG00000055670	Zzef1	2188.81	-0.137442	0.108702	-1.2644	0.206088	0.399061	0.685948
ENSMUSG00000021703	Serinc5	1158.55	-0.763632	0.117652	-6.49059	8.55e-11	8.64e-09	10.068
ENSMUSG00000028873	Cdca8	2398.22	0.29508	0.0962541	3.06564	0.00217206	0.015867	2.66313
ENSMUSG00000021843	Ktn1	1643.57	-0.0804973	0.11083	-0.726316	0.467645	0.659928	0.330083
ENSMUSG00000004096	Cwc15	1620.16	0.0327322	0.0940215	0.348136	0.727738	0.850453	0.138025
ENSMUSG00000040943	Tet2	1146.27	-0.096375	0.123533	-0.780157	0.435299	0.633028	0.361213
ENSMUSG00000039473	Ubn1	2215.88	-0.191424	0.117847	-1.62434	0.104303	0.253476	0.981702
ENSMUSG00000042133	Ppig	2041.52	0.016395	0.105605	0.155249	0.876625	0.937428	0.057186
ENSMUSG00000027951	Adar	2920.12	0.0903039	0.0978642	0.922747	0.356139	0.562732	0.44838
ENSMUSG00000052915	Msl1	2280.02	0.0167329	0.109401	0.15295	0.878438	0.937894	0.056289
ENSMUSG00000030867	Plk1	2421.12	0.491696	0.127168	3.86651	0.000110405	0.00168493	3.95701
ENSMUSG00000020720	Psmd12	2123.71	0.395102	0.131383	3.00726	0.00263612	0.0182235	2.57904
ENSMUSG00000029763	Exoc4	1966.31	-0.133526	0.0968347	-1.37891	0.167924	0.347689	0.774887
ENSMUSG00000021000	Mia2	2018.91	0.0511776	0.0971066	0.527025	0.598176	0.761586	0.223171
ENSMUSG00000020430	Pes1	1979.2	0.375956	0.139687	2.69142	0.00711489	0.0375909	2.14783
ENSMUSG00000032870	Smap2	2056.14	-0.311791	0.129843	-2.40129	0.0163375	0.0683209	1.78681
ENSMUSG00000060992	Copz1	1756.35	0.160549	0.101201	1.58644	0.112639	0.267499	0.948312
ENSMUSG00000016018	Skiv2l2	2066.23	0.244799	0.11433	2.14116	0.0322615	0.111774	1.49132
ENSMUSG00000021816	Ppp3cb	2231.59	0.188775	0.111555	1.69221	0.0906054	0.230695	1.04285
ENSMUSG00000027999	Pla2g12a	924.797	-0.00260857	0.152547	-0.0171001	0.986357	0.993347	0.00596597
ENSMUSG00000028580	Pum1	2075.37	-0.134522	0.105595	-1.27395	0.202682	0.394646	0.693185
ENSMUSG00000036940	Kdm1a	1990.28	0.106301	0.10436	1.0186	0.308392	0.517295	0.510897
ENSMUSG00000032449	Slc25a36	1595.88	-0.29895	0.153955	-1.9418	0.0521613	0.157902	1.28265
ENSMUSG00000024817	Uhrf2	1859.76	-0.196275	0.120059	-1.63481	0.102088	0.249959	0.991026
ENSMUSG00000001415	Smg5	2041.05	0.31028	0.123442	2.51356	0.0119519	0.0544327	1.92256
ENSMUSG00000031835	Mbtps1	2492.83	-0.248648	0.104801	-2.37257	0.017665	0.0723114	1.75289
ENSMUSG00000036781	Rps27l	1931.25	0.312609	0.168319	1.85724	0.0632774	0.179892	1.19875
ENSMUSG00000044627	Swi5	1860.1	0.341532	0.126714	2.69529	0.00703268	0.0372873	2.15288
ENSMUSG00000033487	Fndc3a	1352.92	-0.300501	0.117583	-2.55564	0.0105993	0.0502068	1.97472
ENSMUSG00000050335	Lgals3	1194.72	-0.901165	0.122384	-7.3634	1.79e-13	2.84e-11	12.7465
ENSMUSG00000028309	Rnf20	2149.83	-0.0171917	0.100791	-0.170567	0.864564	0.930611	0.0632027
ENSMUSG00000030603	Psmc4	2247.21	0.408532	0.131724	3.10143	0.00192591	0.0145122	2.71536
ENSMUSG00000042350	Arel1	1601.53	-0.898495	0.109545	-8.20204	2.36e-16	6.98e-14	15.6264
ENSMUSG00000033237	Arid2	2084.79	-0.0424358	0.0953186	-0.4452	0.656175	0.803444	0.18298
ENSMUSG00000033075	Senp1	2346.78	0.132963	0.0938476	1.4168	0.156541	0.331412	0.805373
ENSMUSG00000021244	Ylpm1	2427.73	-0.139892	0.103827	-1.34735	0.177866	0.360447	0.749906
ENSMUSG00000029407	Uso1	1673.01	0.278262	0.107368	2.59168	0.00955091	0.0466792	2.01996
ENSMUSG00000042502	Cd2bp2	2203.46	0.0783803	0.0971278	0.806981	0.419677	0.620258	0.377085
ENSMUSG00000006299	Aamp	1535.2	0.107916	0.116517	0.926177	0.354354	0.560966	0.450563
ENSMUSG00000005813	Metap1	1990.07	0.340306	0.148694	2.28863	0.0221009	0.0847952	1.65559
ENSMUSG00000056820	Tsnax	1990.54	0.280909	0.10396	2.70208	0.00689064	0.0367672	2.16174
ENSMUSG00000009863	Sdhb	1867.54	0.374275	0.108369	3.45372	0.000552917	0.00565582	3.25734
ENSMUSG00000030282	Cmas	1378.69	0.136855	0.114894	1.19115	0.233596	0.432639	0.631535
ENSMUSG00000020089	Ppa1	1913.73	0.634991	0.15705	4.04323	5.27e-05	0.000938657	4.27803
ENSMUSG00000060601	Nr1h2	1660.61	-0.0887217	0.113782	-0.779751	0.435537	0.63313	0.360975
ENSMUSG00000026926	Pmpca	2271.55	0.191325	0.119257	1.60431	0.108646	0.2609	0.963986
ENSMUSG00000027429	Sec23b	1733.69	0.342955	0.12413	2.76287	0.00572952	0.0320594	2.24188
ENSMUSG00000021929	Kpna3	2026.12	0.269483	0.133	2.02618	0.042746	0.136706	1.3691
ENSMUSG00000028552	Eps15	1942.81	-0.122682	0.0944842	-1.29844	0.194138	0.382883	0.71189
[truncated: 13,364 more rows]
