# Supplementary material for: Phosphoglycerate mutase regulates Treg differentiation through control of serine synthesis and one-carbon metabolism
Source: eLife. 2025 Jul 28;14:RP104423. doi: 10.7554/eLife.104423 (PMC12303568; doi:10.7554/eLife.104423)
Supplement: Supplementary file 2. [file elife-104423-supp2.xlsx]

## Sheet: Results
			Assay ID	Cd274 - ADS8832A							Cdkn1c - ADS4569									Ctla4 - ADS3784B				Foxp3 - ASY1724									Foxp3 - ADS569B															Foxp3 - ADS1183
CpG #'s are relative to the ATG translational start codon			From ATG	-5104	-5089	-5069	-5067	-5058	-5044	-5025	-350	-345	-336	-324	-318	-309	-299	-289	-275	3302	3351	3366	3403	-12908	-12894	-12887	-12881	-12876	-12874	-12866	-12862	-12860	-12118	-12114	-12112	-12104	-12101	-12098	-12095	-12092	-12089	-12083	-12080	-12074	-12071	-12062	-12059	-6750	-6741
			From TSS	-91	-76	-56	-54	-45	-31	-12	33	38	47	59	65	74	84	94	108	3448	3497	3512	3549	-6229	-6215	-6208	-6202	-6197	-6195	-6187	-6183	-6181	-5439	-5435	-5433	-5425	-5422	-5419	-5416	-5413	-5410	-5404	-5401	-5395	-5392	-5383	-5380	-71	-62
			GRCm38	Chr19:29367364	Chr19:29367379	Chr19:29367399	Chr19:29367401	Chr19:29367410	Chr19:29367424	Chr19:29367443	Chr7:143461018	Chr7:143461013	Chr7:143461004	Chr7:143460992	Chr7:143460986	Chr7:143460977	Chr7:143460967	Chr7:143460957	Chr7:143460943	Chr1:60912472	Chr1:60912521	Chr1:60912536	Chr1:60912573	ChrX:7573447	ChrX:7573461	ChrX:7573468	ChrX:7573474	ChrX:7573479	ChrX:7573481	ChrX:7573489	ChrX:7573493	ChrX:7573495	ChrX:7574237	ChrX:7574241	ChrX:7574243	ChrX:7574251	ChrX:7574254	ChrX:7574257	ChrX:7574260	ChrX:7574263	ChrX:7574266	ChrX:7574272	ChrX:7574275	ChrX:7574281	ChrX:7574284	ChrX:7574293	ChrX:7574296	ChrX:7579605	ChrX:7579614
			*GRCm39*	Chr19:29344764	Chr19:29344779	Chr19:29344799	Chr19:29344801	Chr19:29344810	Chr19:29344824	Chr19:29344843	Chr7:143014755	Chr7:143014750	Chr7:143014741	Chr7:143014729	Chr7:143014723	Chr7:143014714	Chr7:143014704	Chr7:143014694	Chr7:143014680	Chr1:60951631	Chr1:60951680	Chr1:60951695	Chr1:60951732	ChrX:7439686	ChrX:7439700	ChrX:7439707	ChrX:7439713	ChrX:7439718	ChrX:7439720	ChrX:7439728	ChrX:7439732	ChrX:7439734	ChrX:7440476	ChrX:7440480	ChrX:7440482	ChrX:7440490	ChrX:7440493	ChrX:7440496	ChrX:7440499	ChrX:7440502	ChrX:7440505	ChrX:7440511	ChrX:7440514	ChrX:7440520	ChrX:7440523	ChrX:7440532	ChrX:7440535	ChrX:7445844	ChrX:7445853
			Location	5-Upstream	5-Upstream	5-Upstream	5-Upstream	5-Upstream	5-Upstream	5-Upstream	5-UTR	5-UTR	5-UTR	5-UTR	5-UTR	5-UTR	5-UTR	5-UTR	5-UTR	Exon 2	Exon 2	Exon 2	Exon 2	5-Upstream	5-Upstream	5-Upstream	5-Upstream	5-Upstream	5-Upstream	5-Upstream	5-Upstream	5-Upstream	5-Upstream	5-Upstream	5-Upstream	5-Upstream	5-Upstream	5-Upstream	5-Upstream	5-Upstream	5-Upstream	5-Upstream	5-Upstream	5-Upstream	5-Upstream	5-Upstream	5-Upstream	5-Upstream	5-Upstream
			FASTA ID	Cd274.4910	Cd274.4925	Cd274.4945	Cd274.4947	Cd274.4956	Cd274.4970	Cd274.4989	Cdkn1c.5033	Cdkn1c.5038	Cdkn1c.5047	Cdkn1c.5059	Cdkn1c.5065	Cdkn1c.5074	Cdkn1c.5084	Cdkn1c.5094	Cdkn1c.5108	Ctla4.8448	Ctla4.8497	Ctla4.8512	Ctla4.8549	Foxp3.772	Foxp3.786	Foxp3.793	Foxp3.799	Foxp3.804	Foxp3.806	Foxp3.814	Foxp3.818	Foxp3.820	Foxp3.1562	Foxp3.1566	Foxp3.1568	Foxp3.1576	Foxp3.1579	Foxp3.1582	Foxp3.1585	Foxp3.1588	Foxp3.1591	Foxp3.1597	Foxp3.1600	Foxp3.1606	Foxp3.1609	Foxp3.1618	Foxp3.1621	Foxp3.6930	Foxp3.6939
Sequencing ID: S450	Customer ID	Barcode	EpigenDx ID	CpG#-77	CpG#-76	CpG#-75	CpG#-74	CpG#-73	CpG#-72 cg36296075	CpG#-71	CpG#-31	CpG#-30	CpG#-29	CpG#-28	CpG#-27	CpG#-26	CpG#-25	CpG#-24	CpG#-23	CpG#19	CpG#20	CpG#21	CpG#22	CpG#-238	CpG#-237	CpG#-236	CpG#-235	CpG#-234	CpG#-233	CpG#-232	CpG#-231	CpG#-230	CpG#-154	CpG#-153	CpG#-152	CpG#-151	CpG#-150	CpG#-149	CpG#-148	CpG#-147	CpG#-146	CpG#-145	CpG#-144	CpG#-143	CpG#-142	CpG#-141	CpG#-140	CpG#-68	CpG#-67
% Methylation	Serine-Free 1	EPDIndex431	B134285	0.191498	0.226501	0.290487	0.323741	0.24911	0.641254	0.219539	44.8352	39.5031	43.523	50.1363	47.479	47.5772	48.7598	40.6593	47.9431	90.9592	88.9648	92.1846	90.233	59.0566	82.7465	50.6993	42.3077	80.742	64.2729	76.9643	58.0071	65.897	0.510725	0.404449	0.505561	0.42508	0.826446	0	0.525762	0.530786	0.322581	0.545852	0.110497	0.111111	0	1.24858	0.121065	22.3246	26.7947
	Serine-Free 2	EPDIndex432	B134286	0.178359	0.289687	0.33389	0.496141	0.32591	0.871935	0.388673	48.1986	44.5635	47.4131	55.2691	50.7664	51.9345	52.3635	43.4273	51.2532	85.2273	88.4074	91.7823	89.9168	52.6448	79.0323	43.9636	41.0023	79.2711	61.2385	76.1261	59.6372	61.1738	0.60241	0.294118	0.294118	0.315457	0	0.302115	1.8018	0.304878	1.82927	0.934579	0	0	0.320513	6.07029	0.338983	22.9553	27.3611
	Serine-Free 3	EPDIndex433	B134287	0.430828	0.235405	0.367647	0.411523	0.182149	0.597152	0.564972	41.3918	37.6298	40	45.6712	44.1024	44.4367	45.5594	38.6404	45.9507	89.9497	90.0185	93.9091	91.7181	58.4507	82.243	51.8927	37.619	78.7639	64.6593	79.8107	57.4603	63.7658	0.388601	0.897436	0.25641	0.805369	0.635324	0.508259	0	0.1287	0.25974	0.263158	0.26738	0.664011	0.398406	1.87919	0.144928	22.5039	26.7223
	Serine 1	EPDIndex446	B134288	0.149365	0.216138	0.213828	0.0699301	0.423131	0.496454	0.670641	46.1713	38.893	43.4624	51.5441	46.4029	48.2684	47.093	41.3793	48.9377	92.1228	94.1624	96.0298	96.3768	66.3366	86.2573	53.9823	48.9614	86.4706	68.4524	81.9277	63.9053	68.75	0.402414	0.988142	0.596421	0.426439	1.01833	0	0.4158	0.209644	0.211864	0.429185	0	1.09409	0.438596	1.99557	0	20.3158	27.1436
	Serine 2	EPDIndex447	B134289	0.271739	0.179533	0.21815	0.216169	0.215424	0.21645	0.532387	42.5201	38.0952	43.5721	48.6486	46.7349	45.6522	47.6831	39.0366	47.2939	94.4139	93.5264	96.3516	96.4371	57.9869	87.6	53.0572	42.6877	82.7112	70.3922	83.6292	60.198	61.9048	0.530504	0.39267	0.395257	0.416089	0.398406	0.810811	1.2016	0.671141	0.409277	0.691563	0.556328	0.561798	0.574713	2.15517	0.469484	20.841	27.1261
	Serine 3	EPDIndex448	B134290	0.131752	0.444162	0.18622	0.3663	0.606796	0.308071	0.254291	41.4026	36.0589	39.9402	45.7719	44.1804	44.6325	43.6606	37.3321	43.8756	92.2392	94.1943	95.6776	93.2432	55.597	81.1881	48.6301	45.7912	80.9365	63.5135	82.4503	57.2881	60.2649	0	0.27933	0.27933	0.571429	0.561798	0.282486	0.564972	0	0.285714	0.288184	0	0.291545	0.294118	0.877193	0	21.518	27.2764
	SHIN 1	EPDIndex449	B134291	0.273723	0.266193	0.767263	0.339271	0.5	0.515464	0.884173	44.166	37.9906	40.0149	47.9228	43.4018	44.42	44.1826	38.2418	44.9521	93.7973	95.4338	96.4286	92.9825	60.1695	87.4494	54.1502	41.0853	81.4672	71.1538	86.3636	60.5263	71.5385	0	0.340136	0	0.359712	0.689655	1.06007	0.34965	1.05634	0.34965	0.722022	0.355872	0.719424	0	1.1236	0	24.4534	30.0044
	SHIN 2	EPDIndex450	B134292	0.566679	0.737463	0.314795	0.382343	0.716968	0.370745	0.203666	42.1386	36.5512	42.4919	48.665	45.7072	47.0588	46.8003	38.5344	46.8332	90.6173	92.1269	96.5636	92.4528	55.3846	85.0816	49.3023	42.9929	81.6038	67.6887	81.0304	56.6038	63.357	0.374532	0.742115	0.185529	0.578035	0.373134	0.376648	0.189753	0.764818	0	0.772201	0.194175	0.589391	0	1.61616	0	22.6977	30.1532
	SHIN 3	EPDIndex451	B134293	0.149925	0.248509	0.283019	0.467071	0.2792	0.691244	0.375411	43.737	37.9197	43.7725	47.7689	45.2549	44.3218	46.3751	37.9406	46.7589	93.7633	94.2876	95.5979	95.1572	58.3882	84.3882	54.0311	47.5524	82.9787	71.7765	82.0584	63.5724	70.8966	0.436681	0.862069	0.214133	0	0.436681	0.653595	0.221239	0.892857	0.907029	1.3986	0	0.70922	0.7109	2.13777	0.5	19.7623	25.266
	Methylation Controls	EPDIndex458	Low	0.3125	0.465839	0.757576	1.0479	0.452489	0.465116	1.2987	0.923788	0.113507	0.330033	0.436681	0.751073	0.643087	1.31723	0.554939	0.775194	1.9209	1.73536	1.39635	1.32114	0.207469	0.189394	0.754717	1.13422	0.934579	0.560748	0.369004	0.746269	0.753296	0.195312	0.387597	0.583658	0.207469	0.601202	0.801603	0.20284	0.819672	1.25	1.0661	0	1.53509	0.883002	1.98238	0.47619	1.0503	0.665188
		EPDIndex459	Med	73.9827	74.8695	75.2405	74.9522	74.5235	73.3416	75.1557	80.7867	80.1834	80.7122	77.9686	80.5392	78.3611	78.5503	78.1358	82.1925	39.1938	39.7709	40	39.1768	45.7849	47.6573	47.7632	46.103	47.0052	46.1638	46.2042	47.1279	48.1675	66.267	66.5615	67.911	69.6234	68.2002	69.36	67.4139	69.2863	68.1301	68.5033	68.1219	69.4971	68.547	70.1309	67.0415	45.5723	46.0032
		EPDIndex460	High	97.0209	96.5834	96.3504	96.6283	95.7173	94.7256	97.5182	96.6575	96.7141	97.3031	93.294	96.8085	94.2492	94.3557	92.5054	97.1551	95.2191	95.2569	96.8177	98.041	97.7819	96.5928	95.5932	95.2218	94.5578	96.7354	95.2055	94.6644	97.069	96.3211	96.6777	97.2659	97.3043	97.9764	98.0688	96.3682	98.0508	96.6752	96.8858	97.4848	96.9244	96.875	97.1379	92.3923	97.0467	93.1333
Total Reads	Serine-Free 1	EPDIndex431	B134285	2611	2649	2754	2780	2810	2807	2733	3185	3220	3304	3301	3332	3302	3306	3276	3306	907	1024	1062	1116	530	568	572	572	566	557	560	562	563	979	989	989	941	968	963	951	942	930	916	905	900	893	881	826	3364	3385
	Serine-Free 2	EPDIndex432	B134286	1682	1726	1797	1814	1841	1835	1801	2498	2520	2590	2638	2675	2688	2729	2731	2753	880	923	937	962	397	434	439	439	439	436	444	441	443	332	340	340	317	333	331	333	328	328	321	316	318	312	313	295	3289	3293
	Serine-Free 3	EPDIndex433	B134287	2089	2124	2176	2187	2196	2177	2124	2759	2793	2845	2853	2891	2867	2860	2839	2840	995	1082	1100	1135	568	642	634	630	631	631	634	630	632	772	780	780	745	787	787	778	777	770	760	748	753	753	745	690	3195	3237
	Serine 1	EPDIndex446	B134288	1339	1388	1403	1430	1418	1410	1342	1319	1337	1369	1360	1390	1386	1376	1363	1365	749	788	806	828	303	342	339	337	340	336	332	338	336	497	506	503	469	491	488	481	477	472	466	462	457	456	451	415	1900	1901
	Serine 2	EPDIndex447	B134289	2208	2228	2292	2313	2321	2310	2254	1992	1974	2038	2035	2052	2024	2007	1993	1977	1092	1174	1206	1263	457	500	507	506	509	510	507	505	504	754	764	759	721	753	740	749	745	733	723	719	712	696	696	639	2711	2728
	Serine 3	EPDIndex448	B134290	1518	1576	1611	1638	1648	1623	1573	1925	1969	2008	2034	2062	2068	2098	2084	2090	786	844	856	888	268	303	292	297	299	296	302	295	302	353	358	358	350	356	354	354	352	350	347	341	343	340	342	318	2477	2493
	SHIN 1	EPDIndex449	B134291	1096	1127	1173	1179	1200	1164	1131	1277	1274	1342	1348	1364	1362	1358	1365	1357	661	657	672	684	236	247	253	258	259	260	264	266	260	289	294	290	278	290	283	286	284	286	277	281	278	270	267	240	2241	2253
	SHIN 2	EPDIndex450	B134292	2647	2712	2859	2877	2929	2967	2946	2684	2714	2777	2809	2842	2822	2844	2852	2842	810	851	873	901	390	429	430	421	424	424	427	424	423	534	539	539	519	536	531	527	523	520	518	515	509	504	495	461	3692	3721
	SHIN 3	EPDIndex451	B134293	2001	2012	2120	2141	2149	2170	2131	2403	2442	2497	2510	2550	2536	2538	2525	2530	1411	1488	1522	1590	608	711	707	715	705	698	719	711	725	458	464	467	445	458	459	452	448	441	429	427	423	422	421	400	3365	3384
	Methylation Controls	EPDIndex458	Low	640	644	660	668	663	645	616	866	881	909	916	932	933	911	901	903	885	922	931	984	482	528	530	529	535	535	542	536	531	512	516	514	482	499	499	493	488	480	469	461	456	453	454	420	3618	3608
		EPDIndex459	Med	1499	1532	1559	1569	1574	1613	1606	1983	1963	2022	2038	2040	2038	2028	2017	2016	1166	1222	1265	1312	688	747	760	757	768	769	764	766	764	1251	1268	1259	1195	1239	1250	1249	1247	1230	1216	1214	1213	1170	1222	1156	4325	4341
		EPDIndex460	High	2249	2283	2329	2343	2335	2351	2337	1825	1826	1854	1864	1880	1878	1878	1868	1863	1004	1012	1037	1072	541	587	590	586	588	582	584	581	580	1196	1204	1207	1150	1186	1191	1184	1180	1173	1156	1153	1138	1120	1153	1091	3894	3932
[truncated: 44 more columns]

## Sheet: Summary
	NGS004V1						S450
	PCR ID	Gene	Assay ID	CpGs	Size (bp)	RSQ	Avg Reads
	PCR 15	Ikzf4	ADS3785	5	210	0.971	4526.09
	Ta = 58	Il2	ASY548	2	188	0.988	15446.3
		Foxp3	ADS443	6	181	0.951	532.644
		Ikzf2	ADS4020	6	147	0.991	20618.9
		Foxp3	ADS779B	2	144	0.981	12021.7
		Foxp3	ADS569B	15	113	0.947	468.969
	PCR 16	Tnfrsf18	ADS4018	4	210	0.973	648.7
	Ta = 55	Ctla4	ADS3784B	4	161	0.987	897.367
		Tnf	ASY2219	4	144	0.9	3215.12
		Foxp3	ADS442	2	129	0.975	297.767
		Foxp3	ADS779A	4	111	0.963	95.0357
		Foxp3	ASY1724	9	104	0.994	421.089
	PCR 17	Cd274	ADS8832A	7	149	0.952	1701.68
	Ta = 52	Il2ra	ADS4019	3	144	0.949	527.044
		Il4	ADS017B	3	129	0.985	3859.11
		Cdkn1c	ADS4569	9	123	0.755	2108.51
		Foxp3	ADS1183	5	105	0.978	2773.28
